# Supplementary material
Source: publisher site journal article supplement (https://www.spandidos-publications.com/2796/downloadSupplementary)
Supplement: Supplementary file 1 [file downloadSupplementary]

## Sheet: 96h_all drugs
Table SI. The maximum and average enrichment scores(ES) of known compounds compared with irradiated eIF4G1-silenced cells. Entries are ranged according to their maximum ES and entries in red refer to those with both maximum ES and average ES higher than the thresholds. This table shows ES of all compounds compared with eIF4G1-silenced cells at 96 h after irradiation. The threshold of maximum ES i…
Drugbank_id	Drug_name	Pert_id	Pert_name	Drug_group	ATC_code	Drug_description	Drug_indication	Pubchem_id	ES_maximum	ES_average
DB00580	Valdecoxib	BRD-K12994359	valdecoxib	investigational;withdrawn;	M01AH03;	Valdecoxib was removed from the Canadian, U.S., and E.U. markets in 2005 due to concerns about possible increased risk of heart attack and stroke.	For the treatment of osteoarthritis and dysmenorrhoea	119607	0.722215	0.275413
DB02546	Vorinostat	BRD-K81418486	vorinostat	approved;investigational;	L01XX38;	Vorinostat (rINN) or suberoylanilide hydroxamic acid (SAHA), is a drug currently under investigation for the treatment of cutaneous T cell lymphoma (CTCL), a type of skin cancer, to be used when the disease persists, gets worse, or comes back during or after treatment with other medicines. It is the first in a new class of agents known as histone deacetylase inhibitors. A recent study suggested t…	For the treatment of cutaneous manifestations in patients with cutaneous T-cell lymphoma who have progressive, persistent or recurrent disease on or following two systemic therapies.	5311	0.71665	0.0480558
DB04297	7-[4-(Dimethylamino)Phenyl]-N-Hydroxy-4,6-Dimethyl-7-Oxo-2,4-Heptadienamide	BRD-K68202742	trichostatin-a	experimental;		nucleoside metabolic process		444732	0.71263	0.505422
DB08009	5-[(E)-(5-CHLORO-2-OXO-1,2-DIHYDRO-3H-INDOL-3-YLIDENE)METHYL]-N-[2-(DIETHYLAMINO)ETHYL]-2,4-DIMETHYL-1H-PYRROLE-3-CARBOXAMIDE	BRD-K60623809	SU-11652	experimental;		nucleobase-containing small molecule metabolic process		5329103	0.709355	0.63657
DB08700	3-[(1R)-1-(2,6-dichloro-3-fluorophenyl)ethoxy]-5-(1-piperidin-4-yl-1H-pyrazol-4-yl)pyridin-2-amine	BRD-K78431006	crizotinib	experimental;		innate immune response		11626560	0.70479	0.305359
DB08080	LATRUNCULIN B	BRD-A19248578	latrunculin-b	experimental;		protein tyrosine kinase activity		6436219	0.70427	0.568675
DB04960	Tipifarnib	BRD-K62965247	tipifarnib-P2	investigational;		Tipifarnib (R-115777) is a substance that is being studied in the treatment of acute myeloid leukemia (AML) and other types of cancer. It belongs to the family of drugs called farnesyltransferase inhibitors. It is also called Zarnestra. In June 2005, the FDA issued a Not Approvable Letter for Zarnestra.	Investigated for use/treatment in colorectal cancer, leukemia (myeloid), pancreatic cancer, and solid tumors.	159324	0.69832	0.5251
DB00544	Fluorouracil	BRD-K24844714	fluorouracil	approved;	L01BC02;L01BC52;	A pyrimidine analog that is an antineoplastic antimetabolite. It interferes with DNA synthesis by blocking the thymidylate synthetase conversion of deoxyuridylic acid to thymidylic acid. [PubChem]	For the topical treatment of multiple actinic or solar keratoses. In the 5% strength it is also useful in the treatment of superficial basal cell carcinomas when conventional methods are impractical, such as with multiple lesions or difficult treatment sites. Fluorouracil injection is indicated in the palliative management of some types of cancer, including colon, esophageal, gastric, rectum, bre…	3385	0.69672	0.134976
DB06926	(9Z,11E,13S)-13-hydroxyoctadeca-9,11-dienoic acid	BRD-K86465814	HO-013	experimental;		positive regulation of T cell receptor signaling pathway		6443013	0.688015	0.0988425
DB00322	Floxuridine	BRD-K47832606	floxuridine	approved;		An antineoplastic antimetabolite that is metabolized to fluorouracil when administered by rapid injection. Floxuridine is available as a sterile, nonpyrogenic, lyophilized powder for reconstitution. When administered by slow, continuous, intra-arterial infusion, it is converted to floxuridine monophosphate. It has been used to treat hepatic metastases of gastrointestinal adenocarcinomas and for p…	For palliative management of gastrointestinal adenocarcinoma metastatic to the liver, when given by continuous regional intra-arterial infusion in carefully selected patients who are considered incurable by surgery or other means. Also for the palliative management of liver cancer (usually administered by hepatic intra-arterial infusion).	5790	0.687985	0.578357
DB00342	Terfenadine	BRD-A06352418	terfenadine	withdrawn;	R06AX12;	In the U.S., Terfenadine was superseded by fexofenadine in the 1990s due to the risk of cardiac arrhythmia caused by QT interval prolongation.	For the treatment of allergic rhinitis, hay fever, and allergic skin disorders.	5405	0.68768	0.346562
DB09073	Palbociclib Isethionate	BRD-K51313569	palbociclib	approved;	L01XE33;	This compound belongs to the class of organic compounds known as pyridinylpiperazines. These are compounds containing a pyridinylpiperazine skeleton, which consists of a pyridine linked (not fused) to a piperazine by a bond by a single bond that is not part of a ring.	Palbociclib is indicated in combination with letrozole for the treatment of postmenopausal women with estrogen receptor (ER)-positive, human epidermal growth factor receptor 2 (HER2)-negative advanced breast cancer as initial endocrine-based therapy for their metastatic disease. This indication is approved under accelerated approval based on progression-free survival (PFS). Continued approval for…	5330286	0.68268	0.56126
DB07350	(2E)-N-hydroxy-3-[1-methyl-4-(phenylacetyl)-1H-pyrrol-2-yl]prop-2-enamide	BRD-K74733595	APHA-compound-8	experimental;		anaerobic electron transport chain		10379137	0.679365	0.568203
DB00293	Raltitrexed	BRD-K89839824	raltitrexed	approved;investigational;	L01BA03;	Raltitrexed (brand name Tomudex&amp;reg;) is a chemotherapy drug manufactured AstraZeneca Company, is an antimetabolite used in chemotherapy. It is an inhibitor of thymidylate synthase.	For the treatment of malignant neoplasm of colon and rectum	104758	0.66992	0.600958
DB05022	Amonafide	BRD-K56334280	amonafide	investigational;		Amonafide is a substance that is being studied in the treatment of cancer. It belongs to the families of drugs called topoisomerase inhibitors and intercalating agents.	Investigated for use/treatment in breast cancer, ovarian cancer, and prostate cancer.	50515	0.66947	0.57554
DB03777	Rbt205 Inhibitor	BRD-K31342827	bisindolylmaleimide	experimental;		This compound belongs to the class of organic compounds known as alpha-hydroxyaldehydes. These are organic compounds containing an aldehyde substituted with a hydroxyl group on the adjacent carbon.		2396	0.66777	0.45573
DB05424	CI-1033	BRD-K50168500	canertinib	investigational;		transcription initiation from RNA polymerase II promoter	Investigated for use/treatment in breast cancer and lung cancer.	156414	0.665135	0.205369
DB06616	Bosutinib	BRD-K99964838	bosutinib	approved;	L01XE14;	Bosutinib is a Bcr-Abl kinase inhibitor for the treatment of Philadelphia chromosome-positive (Ph+) chronic myelogenous leukemia (CML). Compared to other tyrosine kinase inhibitors, it has a more favourable hematologic toxicity profile. FDA approved on September 4, 2012.	Treatment of chronic, accelerated, or blast phase Philadelphia chromosome-positive (Ph+) chronic myelogenous leukemia (CML) with resistance or intolerance to prior therapy in adult patients.	5328940	0.661575	0.512408
DB07403	4-[(3-CHLORO-4-{[(2R)-3,3,3-TRIFLUORO-2-HYDROXY-2-METHYLPROPANOYL]AMINO}PHENYL)SULFONYL]-N,N-DIMETHYLBENZAMIDE	BRD-K52836380	AZD-7545	experimental;		maintenance of mitochondrion location		16741245	0.658105	0.342882
DB00675	Tamoxifen Citrate	BRD-K93754473	tamoxifen	approved;	L02BA01;	This compound belongs to the class of organic compounds known as stilbenes. These are organic compounds containing a 1,2-diphenylethylene moiety. Stilbenes (C6-C2-C6 ) are derived from the common phenylpropene (C6-C3) skeleton building block. The introduction of one or more hydroxyl groups to a phenyl ring lead to stilbenoids.	Tamoxifen is indicated for the treatment of metastatic breast cancer in women and men and ductal carcinoma in Situ.	2733526	0.65312	0.4803
DB04690	Camptothecin	BRD-K37890730	camptothecin	experimental;		An alkaloid isolated from the stem wood of the Chinese tree, &lt;i&gt;Camptotheca acuminata&lt;/i&gt;. This compound selectively inhibits the nuclear enzyme DNA topoisomerase, type I. Several semisynthetic analogs of camptothecin have demonstrated antitumor activity. [PubChem]	Investigated for the treatment of cancer.	24360	0.648705	0.405285
DB07340	N~6~-cyclohexyl-N~2~-(4-morpholin-4-ylphenyl)-9H-purine-2,6-diamine	BRD-K77286328	reversine	experimental;		memory		210332	0.648155	0.566982
DB00934	Maprotiline Hydrochloride	BRD-K25433859	maprotiline	approved;	N06AA21;	This compound belongs to the class of organic compounds known as anthracenes. These are organic compounds containing a system of three linearly fused benzene rings.	For treatment of depression, including the depressed phase of bipolar depression, psychotic depression, and involutional melancholia, and may also be helpful in treating certain patients suffering severe depressive neurosis.	4011	0.646325	0.30969
DB02709	Resveratrol	BRD-K80738081	resveratrol	experimental;investigational;		Resveratrol (3,5,4'-trihydroxystilbene) is a polyphenolic phytoalexin. It is a stilbenoid, a derivate of stilbene, and is produced in plants with the help of the enzyme stilbene synthase. It exists as two structural isomers: cis-(Z) and trans-(E), with the trans-isomer shown in the top image. The trans- form can undergo isomerisation to the cis- form when heated or exposed to ultraviolet irradiat…	Being investigated for the treatment of Herpes labialis infections (cold sores).	445154	0.643405	0.0992318
DB01254	Dasatinib monohydrate	BRD-K49328571	dasatinib	approved;investigational;	L01XE06;	This compound belongs to the class of organic compounds known as n-arylpiperazines. These are organic compounds containing a piperazine ring where the nitrogen ring atom carries an aryl group.	For the treatment of adults with chronic, accelerated, or myeloid or lymphoid blast phase chronic myeloid leukemia with resistance or intolerance to prior therapy. Also indicated for the treatment of adults with Philadelphia chromosome-positive acute lymphoblastic leukemia with resistance or intolerance to prior therapy.	3062316	0.64253	0.530611
DB00903	Ethacrynate sodium	BRD-K63630713	etacrynic-acid	approved;	C03CC01;	This compound belongs to the class of organic compounds known as phenoxyacetic acid derivatives. These are compounds containing an anisole where the methane group is linked to an acetic acid or a derivative.	For the treatment of high blood pressure and edema caused by diseases like congestive heart failure, liver failure, and kidney failure.	3278	0.63636	0.317107
DB08911	Trametinib	BRD-K12343256	trametinib	approved;	L01XE25;	Trametinib dimethyl sulfoxide is a kinase inhibitor. Each 1-mg tablet contains 1.127 mg trametinib dimethyl sulfoxide equivalent to 1 mg of trametinib non-solvated parent. FDA approved on May 29, 2013.	Trametinib is indicated for the treatment of unresectable or metastatic melanoma with BRAF V600E or V600K mutations, as detected by an FDA-approved test.	11707110	0.63271	0.181055
DB00993	Azathioprine Sodium	BRD-K32821942	azathioprine	approved;	L04AX01;	This compound belongs to the class of organic compounds known as diarylthioethers. These are organosulfur compounds containing a thioether group that is substituted by two aryl groups.	For use in rheumatoid arthritis, preventing renal transplant rejection, Crohn's disease, and colitis.	2265	0.63268	0.27982
DB01100	Pimozide	BRD-K01292756	pimozide	approved;	N05AG02;	A diphenylbutylpiperidine that is effective as an antipsychotic agent and as an alternative to haloperidol for the suppression of vocal and motor tics in patients with Tourette syndrome. Although the precise mechanism of action is unknown, blockade of postsynaptic dopamine receptors has been postulated. (From AMA Drug Evaluations Annual, 1994, p403)	Used for the suppression of motor and phonic tics in patients with Tourette's Disorder who have failed to respond satisfactorily to standard treatment.	16362	0.62877	0.152987
DB04608	9-HYDROXY-4-PHENYL-6H-PYRROLO[3,4-C]CARBAZOLE-1,3-DIONE	BRD-K82823804	SA-792987	experimental;		organ regeneration		4369491	0.62553	0.465949
DB08881	Vemurafenib	BRD-K56343971	vemurafenib	approved;	L01XE15;	Vemurafenib is a BRAF enzyme inhibitor developed by Plexxikon and Genentech for the treatment of late-stage melanoma. [Wikipedia] The cobas? 4800 BRAF B600 mutation test provided by Roche Molecular Systems is the diagnostic test to confirm eligibility for treatment. FDA approved on August 17, 2011 under the company Hoffmann La Roche.	Treatment of unresectable or metastatic melanoma in patients with the BRAF-V600 mutation.	42611257	0.62201	0.144079
DB00380	Dexrazoxane hydrochloride	BRD-K07265709	razoxane	approved;withdrawn;	V03AF02;	This compound belongs to the class of organic compounds known as alpha amino acids and derivatives. These are amino acids in which the amino group is attached to the carbon atom immediately adjacent to the carboxylate group (alpha carbon), or a derivative thereof.	For reducing the incidence and severity of cardiomyopathy associated with doxorubicin administration in women with metastatic breast cancer who have received a cumulative doxorubicin hydrochloride dose of 300 mg/m^2 and would benefit from continued doxorubicin therapy. Also approved for the treatment of extravasation from intravenous anthracyclines.	71384	0.61069	0.25228
DB03880	Batimastat	BRD-K82818427	batimastat	experimental;		carbohydrate metabolic process		5362422	0.60422	0.458965
DB08142	4-{[(2,6-dichlorophenyl)carbonyl]amino}-N-piperidin-4-yl-1H-pyrazole-3-carboxamide	BRD-K13390322	AT-7519	experimental;		organ regeneration		11338033	0.601775	0.358859
DB04849	AZD2171	BRD-K86930074	cediranib	investigational;		The novel indole-ether quinazoline AZD2171 is a highly potent (IC&lt;sub&gt;50&lt;/sub&gt; &amp;lt; 1 nmol/L) ATP-competitive inhibitor of recombinant KDR tyrosine kinase in vitro. It is being developed clinically as a once-daily oral therapy for the treatment of cancer.	For the treatment of liver cancer, advanced non-small cell lung cancer (NSCLC), advanced colorectal cancer (CRC) and other solid tumors.	9933475	0.601195	0.485775
DB04751	Purvalanol A	BRD-K50836978	purvalanol-a	experimental;		This compound belongs to the class of organic compounds known as xanthenes. These are polycyclic aromatic compounds containing a xanthene moiety, which consists of two benzene rings joined to each other by a pyran ring.		456214	0.60101	0.597947
DB06144	Sertindole	BRD-K69116396	sertindole	approved;withdrawn;	N05AE03;	Sertindole, a neuroleptic, is one of the newer antipsychotic medications available. Serdolect is developed by the Danish pharmaceutical company H. Lundbeck. Like the other atypical antipsychotics, it has activity at dopamine and serotonin receptors in the brain. It is used in the treatment of schizophrenia. It is classified chemically as a phenylindole derivative. It was first marketed in 1996 in…	Used in the treatment of schizophrenia.	60149	0.60088	0.28099
DB08167	3,7-BIS(DIMETHYLAMINO)PHENOTHIAZIN-5-IUM	BRD-K16406336	methylene-blue	experimental;		apoptotic process		4139	0.59912	0.334126
DB07859	4-(4-CHLOROPHENYL)-4-[4-(1H-PYRAZOL-4-YL)PHENYL]PIPERIDINE	BRD-K12040459	AT7867	experimental;		regulation of G2/M transition of mitotic cell cycle		11175137	0.59704	0.355859
DB03496	Flavopiridol hydrochloride	BRD-K87909389	alvocidib	experimental;investigational;		This compound belongs to the class of organic compounds known as flavones. These are flavonoids with a structure based on the backbone of 2-phenylchromen-4-one (2-phenyl-1-benzopyran-4-one).	Investigated for use/treatment in esophageal cancer, leukemia (lymphoid), lung cancer, liver cancer, and lymphoma (unspecified).	5287969	0.590165	0.198755
DB02656	2-(4-Morpholinyl)-8-Phenyl-4h-1-Benzopyran-4-One	BRD-K27305650	LY-294002	experimental;		asparagine metabolic process		3973	0.588695	0.291171
DB00637	Astemizole	BRD-K37249724	astemizole	approved;withdrawn;	R06AX11;	Astemizole is a long-acting, non-sedating second generation antihistamine used in the treatment of allergy symptoms. It was withdrawn from market by the manufacturer in 1999 due to the potential to cause arrhythmias at high doses, especially when when taken with CYP inhibitors or grapefruit juice.	Astemizole was indicated for use in the relieving allergy symptoms, particularly rhinitis and conjunctivitis. It has been withdrawn from the market however due to concerns of arrhythmias.	2247	0.580925	0.12052
DB00146	Calcidiol	BRD-K77175907	calcifediol	approved;nutraceutical;	A11CC06;	The major circulating metabolite of vitamin D3 (cholecalciferol). It is produced in the liver and is the best indicator of the body's vitamin D stores. It is effective in the treatment of rickets and osteomalacia, both in azotemic and non-azotemic patients. Calcifediol also has mineralizing properties. [PubChem]	Used to treat vitamin D deficiency or insufficiency, refractory rickets (vitamin D resistant rickets), familial hypophosphatemia and hypoparathyroidism, and in the management of hypocalcemia and renal osteodystrophy in patients with chronic renal failure undergoing dialysis. Also used in conjunction with calcium in the management and prevention of primary or corticosteroid-induced osteoporosis.	5283731	0.580125	0.287325
DB01195	Flecainide acetate	BRD-A09472452	flecainide	approved;withdrawn;	C01BC04;	This compound belongs to the class of organic compounds known as salicylamides. These are carboxamide derivatives of salicylic acid. Salicylic acid is the ortho-hydroxylated derivative of benzoic acid.	Flecainide is is a class Ic antiarrhythmic agent and as such, it is used for the prevention of paroxysmal supraventricular tachycardias (PSVT), including atrioventricular nodal reentrant tachycardia, atrioventricular reentrant tachycardia and other supraventricular tachycardias of unspecified mechanism associated with disablin.	3356	0.572275	0.114312
DB05448	PX-12	BRD-A56592690	PX-12	investigational;		PX-12 (1-methylpropyl 2-imidazolyl disulfide) is a small-molecule inhibitor of Trx-1 (thioredoxin-1), stimulates apoptosis, down-regulates HIF-1α and vascular endothelial growth factor (VEGF) and inhibits tumor growth in animal models. Since high levels of Trx-1 have been associated with colorectal, gastric and lung cancers, PX-12 is indicated as a potential cancer treatment in combination with c…	Investigated for use/treatment in cancer/tumors (unspecified), gastric cancer, and pancreatic cancer.	219104	0.56415	0.53618
DB08073	(2S)-1-(1H-INDOL-3-YL)-3-{[5-(3-METHYL-1H-INDAZOL-5-YL)PYRIDIN-3-YL]OXY}PROPAN-2-AMINE	BRD-K38615104	A-443644	experimental;		regulation of smooth muscle cell migration		10172943	0.563725	0.501497
DB00850	Perphenazine enanthate	BRD-K10995081	perphenazine	approved;	N05AB03;	This compound belongs to the class of organic compounds known as phenothiazines. These are polycyclic aromatic compounds containing a phenothiazine moiety, which is a linear tricyclic system that consists of a two benzene rings joined by a para-thiazine ring.	For use in the management of the manifestations of psychotic disorders and for the control of severe nausea and vomiting in adults.	4748	0.56207	0.448665
DB08597	6-[4-(2-piperidin-1-ylethoxy)phenyl]-3-pyridin-4-ylpyrazolo[1,5-a]pyrimidine	BRD-K54233340	dorsomorphin	experimental;		RNA phosphodiester bond hydrolysis, endonucleolytic		11524144	0.561915	0.499827
DB04842	Fluspirilene	BRD-K77947974	fluspirilene	approved;	N05AG01;	A long-acting injectable antipsychotic agent used for chronic schizophrenia.	Used for the treatment of schizophrenia.	3396	0.559225	0.221881
DB01083	Orlistat	BRD-K63343048	orlistat	approved;investigational;	A08AB01;	Orlistat is a drug designed to treat obesity. Its primary function is preventing the absorption of fats from the human diet, thereby reducing caloric intake. Orlistat works by inhibiting pancreatic lipase, an enzyme that breaks down triglycerides in the intestine. Without this enzyme, triglycerides from the diet are prevented from being hydrolyzed into absorbable free fatty acids and are excreted…	For obesity management including weight loss and weight maintenance when used in conjunction with a reduced-calorie diet. Also used to reduce the risk for weight regain after prior weight loss. Use of orlistat is pending revision due to reports of liver-related adverse events.	3034010	0.55587	0.2609
DB00257	Clotrimazole	BRD-K15916496	clotrimazole	approved;vet_approved;	A01AB18;D01AC01;G01AF02;	An imidazole derivative with a broad spectrum of antimycotic activity. It inhibits biosynthesis of the sterol ergostol, an important component of fungal cell membranes. Its action leads to increased membrane permeability and apparent disruption of enzyme systems bound to the membrane. [PubChem]	For the local treatment of oropharyngeal candidiasis and vaginal yeast infections, also used in fungal infections of the skin such as ringworm, athlete's foot, and jock itch.	2812	0.55472	0.085175
DB00227	Lovastatin	BRD-K09416995	lovastatin	approved;investigational;	C10AA02;C10BA01;	Lovastatin is a cholesterol-lowering agent that belongs to the class of medications called statins. It was the second agent of this class discovered. It was discovered by Alfred Alberts and his team at Merck in 1978 after screening only 18 compounds over 2 weeks. The agent, also known as mevinolin, was isolated from the fungi &lt;i&gt;Aspergillus terreus&lt;/i&gt;. Research on this compound was s…	For management as an adjunct to diet to reduce elevated total-C, LDL-C, apo B, and TG levels in patients with primary hypercholesterolemia and mixed dyslipidemia. For primary prevention of coronary heart disease and to slow progression of coronary atherosclerosis in patients with coronary heart disease.	53232	0.553535	0.458685
DB00269	Chlorotrianisene	BRD-K27062708	chlorotrianisene	withdrawn;	G03CA06;	A powerful synthetic, non-steroidal estrogen. [PubChem]	Used to treat symptoms of menopause, deficiencies in ovary function (including underdevelopment of female sexual characteristics and some types of infertility), and in rare cases, prostate cancer. Chlorotrianisene may also be used to prevent breast engorgement following childbirth.	11289	0.552415	0.117358
DB00412	Rosiglitazone Maleate	BRD-A97437073	rosiglitazone	approved;investigational;	A10BD03;A10BD04;A10BG02;	This compound belongs to the class of organic compounds known as phenol ethers. These are aromatic compounds containing an ether group substituted with a benzene ring.	Rosiglitazone is indicated as an adjunct to diet and exercise to improve glycemic control in adults with type 2 diabetes mellitus.	77999	0.548895	0.0289338
DB00673	Aprepitant	BRD-K52827117	aprepitant	approved;investigational;	A04AD12;	Aprepitant, an antiemetic, is a substance P/neurokinin 1 (NK1) receptor antagonist which, in combination with other antiemetic agents, is indicated for the prevention of acute and delayed nausea and vomiting associated with initial and repeat courses of highly emetogenic cancer chemotherapy. Aprepitant is a selective high-affinity antagonist of human substance P/neurokinin 1 (NK1) receptors. Apre…	For the prevention of nausea and vomiting associated with highly emetogenic cancer chemotherapy, including high-dose cisplatin (in combination with other antiemetic agents).	6918365	0.54652	0.470807
DB00203	Sildenafil Citrate	BRD-K50128260/BRD-K79759585	sildenafil	approved;investigational;	G04BE03;	This compound belongs to the class of organic compounds known as benzenesulfonamides. These are organic compounds containing a sulfonamide group that is S-linked to a benzene ring.	For the treatment of erectile dysfunction and to relieve symptoms of pulmonary arterial hypertension (PAH).	5212	0.542365	0.160869
DB07101	N-{[(2R)-2,3-dihydroxypropyl]oxy}-3,4-difluoro-2-[(2-fluoro-4-iodophenyl)amino]benzamide	BRD-K49865102	PD-0325901	experimental;		innate immune response		9826528	0.542195	0.152368
DB00518	Albendazole	BRD-K79131256	albendazole	approved;vet_approved;	P02CA03;	A benzimidazole broad-spectrum anthelmintic structurally related to mebendazole that is effective against many diseases. (From Martindale, The Extra Pharmacopoeia, 30th ed, p38)	For the treatment of parenchymal neurocysticercosis due to active lesions caused by larval forms of the pork tapeworm, &lt;i&gt;Taenia solium&lt;/i&gt; and for the treatment of cystic hydatid disease of the liver, lung, and peritoneum, caused by the larval form of the dog tapeworm, &lt;i&gt;Echinococcus granulosus&lt;/i&gt;.	2082	0.537565	0.038125
DB03083	IC261	BRD-K09638361	SA-63133	experimental;		regulation of smooth muscle cell migration		5288600	0.53587	0.334779
DB00249	Idoxuridine	BRD-K76634210	idoxuridine	approved;	D06BB01;J05AB02;S01AD01;	An analog of deoxyuridine that inhibits viral DNA synthesis. The drug is used as an antiviral agent. [PubChem]	For use in keratoconjunctivitis and keratitis caused by herpes simplex virus.	5905	0.535585	0.285482
DB09101	Elvitegravir	BRD-K54472332	elvitegravir	approved;	J05AR09;J05AR18;J05AX11;	The metabolism of Theophylline can be increased when combined with Thyroid extract.	Elvitegravir in combination with an HIV protease inhibitor coadministered with ritonavir and with other antiretroviral drug(s) is indicated for the treatment of HIV-1 infection in antiretroviral treatment-experienced adults.	5277135	0.535165	0.466517
DB04942	Tamibarotene	BRD-K36627727	tamibarotene	approved;investigational;		Tamibarotene is a novel synthetic retinoid for acute promyelocytic leukaemia (APL). Tamibarotene is currently approved in Japan for treatment of recurrent APL, and is undergoing clinical trials in the United States.	Investigated for use/treatment in leukemia (unspecified).	108143	0.53498	0.527655
DB00987	Cytarabine	BRD-K33106058	cytarabine	approved;investigational;	L01BC01;	A pyrimidine nucleoside analog that is used mainly in the treatment of leukemia, especially acute non-lymphoblastic leukemia. Cytarabine is an antimetabolite antineoplastic agent that inhibits the synthesis of DNA. Its actions are specific for the S phase of the cell cycle. It also has antiviral and immunosuppressant properties. (From Martindale, The Extra Pharmacopoeia, 30th ed, p472)	For the treatment of acute non-lymphocytic leukemia, acute lymphocytic leukemia and blast phase of chronic myelocytic leukemia.	6253	0.53452	0.296312
DB00317	Gefitinib	BRD-K64052750	gefitinib	approved;investigational;	L01XE02;	Gefitinib (originally coded ZD1839) is a drug used in the treatment of certain types of cancer. Acting in a similar manner to erlotinib (marketed as Tarceva), gefitinib selectively targets the mutant proteins in malignant cells. It is marketed by AstraZeneca under the trade name Iressa. [Wikipedia]	For the continued treatment of patients with locally advanced or metastatic non-small cell lung cancer after failure of either platinum-based or docetaxel chemotherapies.	123631	0.53375	0.0999046
DB09079	Nintedanib Esylate	BRD-K49075727	nintedanib	approved;	L01XE31;	This compound belongs to the class of organic compounds known as indolecarboxylic acids. These are compounds containing a carboxylic acid group linked to an indole.	Nintedanib is indicated for the treatment of idiopathic pulmonary fibrosis (IPF).	9809715	0.532205	0.310532
DB00401	Nisoldipine	BRD-A96107863/BRD-A84465106	nisoldipine	approved;	C08CA07;	Nisoldipine is a 1,4-dihydropyridine calcium channel blocker. It acts primarily on vascular smooth muscle cells by stabilizing voltage-gated L-type calcium channels in their inactive conformation. By inhibiting the influx of calcium in smooth muscle cells, nisoldipine prevents calcium-dependent smooth muscle contraction and subsequent vasoconstriction. Nisoldipine may be used in alone or in combi…	For the treatment of hypertension. It may be used alone or in combination with other antihypertensive agents.	4499	0.53119	0.164027
DB08059	(1S,6BR,9AS,11R,11BR)-9A,11B-DIMETHYL-1-[(METHYLOXY)METHYL]-3,6,9-TRIOXO-1,6,6B,7,8,9,9A,10,11,11B-DECAHYDRO-3H-FURO[4,3,2-DE]INDENO[4,5-H][2]BENZOPYRAN-11-YL ACETATE	BRD-K87343924	wortmannin	experimental;		protein ADP-ribosylation		312145	0.530705	0.530705
DB00499	Flutamide	BRD-K28307902	flutamide	approved;	L02BB01;	An antiandrogen with about the same potency as cyproterone in rodent and canine species.	For the management of locally confined Stage B2-C and Stage D2 metastatic carcinoma of the prostate	3397	0.52639	0.0360217
DB07352	5,7-dihydroxy-2-(4-hydroxyphenyl)-4H-chromen-4-one	BRD-K01493881	apigenin	experimental;		proteolysis		5280443	0.523345	0.491997
DB08901	Ponatinib Hydrochloride	BRD-K44227013	ponatinib	approved;	L01XE24;	This compound belongs to the class of organic compounds known as n-phenylbenzamides. These are benzamides that are N-linked to a phenyl group via the carboxamide group.	Ponatinib is indicated for the treatment of adult patients with chronic phase, accelerated phase, or blast phase chronic myeloid leukemia (CML) that is resistant or intolerant to prior tyrosine kinase inhibitor therapy or Philadelphia chromosome positive acute lymphoblastic leukemia (Ph+ALL) that is resistant or intolerant to prior tyrosine kinase inhibitor therapy.	24826799	0.522965	0.0767981
DB00641	Simvastatin	BRD-K22134346	simvastatin	approved;	A10BH51;C10AA01;C10BA02;C10BA04;C10BX01;C10BX04;	Simvastatin is a lipid-lowering agent that is derived synthetically from the fermentation of Aspergillus terreus. It is a potent competitive inhibitor of 3-hydroxy-3-methylglutaryl coenzyme A reductase (hydroxymethylglutaryl COA reductases), which is the rate-limiting enzyme in cholesterol biosynthesis. It may also interfere with steroid hormone production. Due to the induction of hepatic LDL rec…	For the treatment of hypercholesterolemia and for the reduction in the risk of cardiac heart disease mortality and cardiovascular events. It can also be used in adolescent patients for the treatment of heterozygous familial hypercholesterolemia.	54454	0.52266	0.426627
DB00523	Alitretinoin	BRD-K35483542	alitretinoin	approved;investigational;	D11AH04;L01XX22;	An important regulator of gene expression during growth and development, and in neoplasms. Tretinoin, also known as retinoic acid and derived from maternal vitamin A, is essential for normal growth; and embryonic development. An excess of tretinoin can be teratogenic. It is used in the treatment of psoriasis; acne vulgaris; and several other skin diseases. It has also been approved for use in pro…	For topical treatment of cutaneous lesions in patients with AIDS-related Kaposi's sarcoma.	449171	0.522525	0.46908
DB04868	Nilotinib hydrochloride monohydrate	BRD-K81528515	nilotinib	approved;investigational;	L01XE08;	This compound belongs to the class of organic compounds known as n-phenylbenzamides. These are benzamides that are N-linked to a phenyl group via the carboxamide group.	For the potential treatment of various leukemias, including chronic myeloid leukemia (CML).	644241	0.521655	0.173251
DB00982	Isotretinoin	BRD-K76723084	isotretinoin	approved;	D10AD04;D10AD54;D10BA01;	Isotretinoin is a medication used for the treatment of severe acne. It is sometimes used in prevention of certain skin cancers. It is a retinoid, meaning it derives from vitamin A and is found in small quantities naturally in the body. Isotretinoin binds to and activates nuclear retinoic acid receptors (RAR), thereby regulating cell proliferation and differentiation. This agent also exhibits immu…	For the treatment of severe recalcitrant nodular acne	5282379	0.52089	0.492555
DB00253	Medrysone	BRD-K56515112	medrysone	approved;	S01BA08;	Medrysone is a corticosteroid used in ophthalmology. [Wikipedia]	For the treatment of allergic conjunctivitis, vernal conjunctivitis, episcleritis, and epinephrine sensitivity.	247839	0.52053	0.269238
DB04209	Dequadin	BRD-K77685957	dequalinium	experimental;		A topical bacteriostat that is available as various salts. It is used in wound dressings and mouth infections and may also have antifungal action, but may cause skin ulceration. [PubChem]		2993	0.51917	0.284407
DB01782	2,6-Dihydroanthra/1,9-Cd/Pyrazol-6-One	BRD-K01567962	pyrazolanthrone	experimental;		substantia nigra development		8515	0.514	0.242599
DB00507	Nitazoxanide	BRD-K96471533	nitazoxanide	approved;investigational;vet_approved;	P01AX11;	Nitazoxanide, also known by the brand name Alinia, is a synthetic nitrothiazolyl-salicylamide derivative and an anti-protozoal agent. It is approved for treatment of infectious diarrhea caused by Cryptosporidium parvum and Giardia lamblia in patients 1 year of age and older. Following oral administration it is rapidly hydrolyzed to its active metabolite, tizoxanide, which is 99% protein bound. Pe…	For the treatment of diarrhea in adults and children caused by the protozoa &lt;i&gt;Giardia lamblia&lt;/i&gt; and for the treatment of diarrhea in children caused by the protozoa &lt;i&gt;Cryptosporidium parvum&lt;/i&gt;.	41684	0.513495	0.0498975
DB00162	Vitamin A acetate	BRD-K64634304/BRD-K22429181	tretinoin/retinol	approved;nutraceutical;vet_approved;	A11CA01;D10AD02;R01AX02;S01XA02;	This compound belongs to the class of organic compounds known as retinoids. These are oxygenated derivatives of 3,7-dimethyl-1-(2,6,6-trimethylcyclohex-1-enyl)nona-1,3,5,7-tetraene and derivatives thereof.	For the treatment of vitamin A deficiency.	445354	0.51345	0.242911
DB05318	NGX-4010	BRD-K50590187	capsaicin	investigational;		NGX-4010 is a NeurogesX's novel high-concentration trans-capsaicin dermal patch.	Investigated for use/treatment in neurologic disorders, pain (acute or chronic), and post herpetic neuralgia.	1548943	0.513395	0.245317
DB00622	Nicardipine Hydrochloride	BRD-A26711594	nicardipine	approved;	C08CA04;	This compound belongs to the class of organic compounds known as dihydropyridinecarboxylic acids and derivatives. These are compounds containing a dihydropyridine moiety bearing a carboxylic acid group.	Used for the management of patients with chronic stable angina and for the treatment of hypertension.	4474	0.512255	0.424198
DB00197	Troglitazone	BRD-A13084692	troglitazone	withdrawn;	A10BG01;	Troglitazone was withdrawn in 2000 due to risk of hepatotoxicity. It was superseded by pioglitazone and rosiglitazone.	For the treatment of Type II diabetes mellitus. It is used alone or in combination with a sulfonylurea, metformin, or insulin as an adjunct to diet and exercise.	5591	0.509255	0.250509
DB00472	Fluoxetine Hydrochloride	BRD-A31159102	fluoxetine	approved;vet_approved;	N06AB03;N06CA03;	This compound belongs to the class of organic compounds known as phenylpropylamines. These are compounds containing a phenylpropylamine moiety, which consists of a phenyl group substituted at the third carbon by an propan-1-amine.	Labeled indication include: major depressive disorder (MDD), moderate to severe bulimia nervosa, obsessive-compulsive disorder (OCD), premenstrual dysphoric disorder (PMDD), panic disorder with or without agoraphobia, and combination treatment with olanzapine for treatment-resistant or bipolar I depression. Unlabeled indications include: selective mutism, mild dementia-associated agitation in non…	3386	0.508265	0.474635
DB07361	1-(3-chlorophenyl)-3-{5-[2-(thieno[3,2-d]pyrimidin-4-ylamino)ethyl]-1,3-thiazol-2-yl}urea	BRD-K71512533	SNS-314	experimental;		protein phosphorylation		24995524	0.50632	0.270852
DB02690	NU1025	BRD-K48692744	NU-1025	experimental;		positive regulation of endothelial cell proliferation		63306	0.50201	0.0239075
DB00188	Bortezomib	BRD-K88510285	bortezomib	approved;investigational;	L01XX32;	Bortezomib (originally PS-341 and marketed as Velcade by Millennium Pharmaceuticals) is the first therapeutic proteasome inhibitor to be tested in humans. It is approved in the U.S. for treating relapsed multiple myeloma and mantle cell lymphoma. In multiple myeloma, complete clinical responses have been obtained in patients with otherwise refractory or rapidly advancing disease.	For treatment of multiple myeloma in patients who have not been successfully treated with at least two previous therapies.	387447	0.499635	0.36808
DB01007	Tioconazole	BRD-A33084557	tioconazole	approved;	D01AC07;G01AF08;	Tioconazole is an antifungal medication of the Imidazole class used to treat infections caused by a fungus or yeast. Tioconazole topical (skin) preparations are also available for ringworm, jock itch, athlete's foot, and tinea versicolor or sun fungus. Tioconazole interacts with 14-alpha demethylase, a cytochrome P-450 enzyme that converts lanosterol to ergosterol, an essential component of the y…	For the local treatment of vulvovaginal candidiasis (moniliasis).	5482	0.49843	0.444707
DB00861	Diflunisal	BRD-K22031190	diflunisal	approved;	N02BA11;	Diflunisal, a salicylate derivative, is a nonsteroidal anti-inflammatory agent (NSAIA) with pharmacologic actions similar to other prototypical NSAIAs. Diflunisal possesses anti-inflammatory, analgesic and antipyretic activity. Though its mechanism of action has not been clearly established, most of its actions appear to be associated with inhibition of prostaglandin synthesis via the arachidonic…	For symptomatic treatment of mild to moderate pain accompanied by inflammation (e.g. musculoskeletal trauma, post-dental extraction, post-episiotomy), osteoarthritis, and rheumatoid arthritis.	3059	0.497995	0.401505
DB00421	Spironolactone	BRD-K90027355	spironolactone	approved;	C03DA01;	A potassium sparing diuretic that acts by antagonism of aldosterone in the distal renal tubules. It is used mainly in the treatment of refractory edema in patients with congestive heart failure, nephrotic syndrome, or hepatic cirrhosis. Its effects on the endocrine system are utilized in the treatments of hirsutism and acne but they can lead to adverse effects. (From Martindale, The Extra Pharmac…	Used primarily to treat low-renin hypertension, hypokalemia, and Conn's syndrome.	5833	0.496055	0.419872
DB00292	Etomidate	BRD-K55055802	BRD-K55055802	approved;	N01AX07;	Imidazole derivative anesthetic and hypnotic with little effect on blood gases, ventilation, or the cardiovascular system. It has been proposed as an induction anesthetic. [PubChem]	Used in the induction of general anesthesia.	667484	0.49464	0.422075
DB07697	1-(2,3-dihydro-1,4-benzodioxin-6-ylsulfonyl)-4-[(4-methoxyphenyl)sulfonyl]piperazine	BRD-K44241590	ASN-05257430	experimental;		cellular component disassembly involved in execution phase of apoptosis		650361	0.493535	0.36544
DB00758	Clopidogrel Bisulfate	BRD-K27721098	clopidogrel	approved;nutraceutical;	B01AC04;	This compound belongs to the class of organic compounds known as alpha amino acid esters. These are ester derivatives of alpha amino acids.	For the reduction of atherosclerotic events (myocardial infarction, stroke, and vascular death) in patients with atherosclerosis documented by recent stroke, recent myocardial infarction, or established peripheral arterial disease.	60606	0.49087	0.21934
DB00193	Tramadol Hydrochloride	BRD-K04412738	tramadol	approved;investigational;	N02AX02;N02AX52;	This compound belongs to the class of organic compounds known as anisoles. These are organic compounds containing a methoxybenzene or a derivative thereof.	Indicated in the treatment of moderate to severe pain. Consider for those prone to constipation or respiratory depression. Tramadol is used to treat postoperative, dental, cancer, and acute musculosketetal pain and as an adjuvant to NSAID therapy in patients with osteoarthritis.	33741	0.490245	0.0585
DB00593	Ethosuximide	BRD-A99633051	ethosuximide	approved;	N03AD01;N03AD51;	An anticonvulsant especially useful in the treatment of absence seizures unaccompanied by other types of seizures. [PubChem]	For the treatment of petit mal epilepsy.	3291	0.489875	0.074865
DB01889	16,17-Androstene-3-Ol	BRD-K24994810	androstenol	experimental;		organ regeneration		101989	0.489795	0.03834
DB00868	Benzonatate	BRD-K91699951	benzonatate	approved;	R05DB01;	Benzonatate is a non-narcotic oral antitussive (cough suppressant) drug which works by anesthetizing the tissues of the lungs and pleura responsible for the cough reflex. It is chemically related to other ester anesthetics such as procaine. It has an anesthetic (numbing) action similar to that of benzocaine and numbs the stretch sensors in the lungs. It is the stretching of these sensors with bre…	For the symptomatic relief of cough. Has also been applied locally in the oral cavity in adults by releasing the drug from the liquid-filled capsules to provide oropharyngeal anesthesia for conscious intubation.	7699	0.48723	0.46952
DB01054	Nitrendipine	BRD-A02006392/BRD-A12560204	nitrendipine	approved;	C08CA08;C09BB06;	A calcium channel blocker with marked vasodilator action. It is an effective antihypertensive agent and differs from other calcium channel blockers in that it does not reduce glomerular filtration rate and is mildly natriuretic, rather than sodium retentive. [PubChem]	For the treatment of mild to moderate hypertension	4507	0.48643	0.312415
DB00966	Telmisartan	BRD-K73999723	telmisartan	approved;investigational;	C09CA07;C09DA07;C09DB04;	Telmisartan is an angiotensin II receptor antagonist (ARB) used in the management of hypertension. Generally, angiotensin II receptor blockers (ARBs) such as telmisartan bind to the angiotensin II type 1 (AT1) receptors with high affinity, causing inhibition of the action of angiotensin II on vascular smooth muscle, ultimately leading to a reduction in arterial blood pressure. Recent studies sugg…	Used alone or in combination with other classes of antihypertensives for the treatment of hypertension. Also used in the treatment of diabetic nephropathy in hypertensive patients with type 2 diabetes mellitus, as well as the treatment of congestive heart failure (only in patients who cannot tolerate ACE inhibitors).	65999	0.485815	0.250663
DB01153	Sertaconazole nitrate	BRD-A95939040	sertaconazole	approved;	D01AC14;G01AF19;	This compound belongs to the class of organic compounds known as benzothiophenes. These are organic compounds containing a benzene fused to a thiepine ring (a five-membered ring with six carbon atoms and one sulfur atom).	For the topical treatment of interdigital tinea pedis in immunocompetent patients 12 years of age and older, caused by &lt;i&gt;Trichophyton rubrum&lt;/i&gt;, &lt;i&gt;Trichophyton mentagrophytes&lt;/i&gt;, and &lt;i&gt;Epidermophyton floccosum&lt;/i&gt;.	65863	0.485585	0.061405
DB00783	Estradiol acetate	BRD-K18910433	estradiol	approved;investigational;vet_approved;	G02BB01;G03AA14;G03AB08;G03CA03;G03CA53;G03EA01;G03EA02;G03EA03;G03FA01;G03FA02;G03FA03;G03FA04;G03FA05;G03FA06;G03FA07;G03FA08;G03FA09;G03FA10;G03FA11;G03FA12;G03FA13;G03FA14;G03FA15;G03FA16;G03FA17;G03FB01;G03FB02;G03FB03;G03FB04;G03FB05;G03FB06;G03FB07;G03FB08;G03FB09;G03FB10;G03FB11;G03FB12;G03HB01;	This compound belongs to the class of organic compounds known as estrogens and derivatives. These are steroids with a structure containing a 3-hydroxylated estrane.	For the treatment of urogenital symptoms associated with post-menopausal atrophy of the vagina (such as dryness, burning, pruritus and dyspareunia) and/or the lower urinary tract (urinary urgency and dysuria).	5757	0.485205	0.059585
DB02300	Calcipotriol hydrate	BRD-K56429665	calcipotriol	approved;	D05AX02;D05AX52;	This compound belongs to the class of organic compounds known as triterpenoids. These are terpene molecules containing 8 isoprene units.	For the treatment of moderate plaque psoriasis in adults.	5288783	0.48448	0.024455
DB00370	Mirtazapine	BRD-A64977602	mirtazapine	approved;	N06AX11;	Mirtazapine is an antidepressant introduced by Organon International in 1996 used for the treatment of moderate to severe depression. Mirtazapine has a tetracyclic chemical structure and is classified as a noradrenergic and specific serotonergic antidepressant (NaSSA). It is the only tetracyclic antidepressant that has been approved by the Food and Drug Administration to treat depression. [Wikipe…	For the treatment of major depressive disorder.	4205	0.48436	0.437503
DB01601	Lopinavir	BRD-K99451608	lopinavir	approved;	J05AR10;	Lopinavir (ABT-378) is an antiretroviral of the protease inhibitor class. It is marketed by Abbott as Kaletra, a co-formulation with a sub-therapeutic dose of ritonavir, as a component of combination therapy to treat HIV/AIDS.	Indicated in combination with other antiretroviral agents for the treatment of HIV-infection.	92727	0.484255	0.407618
DB00603	Medroxyprogesterone acetate	BRD-K82216340	medroxyprogesterone	approved;investigational;		small molecule metabolic process	Used as a contraceptive and to treat secondary amenorrhea, abnormal uterine bleeding, pain associated with endometriosis, endometrial and renal cell carcinomas, paraphilia in males, GnRH-dependent forms of precocious puberty, as well as to prevent endometrial changes associated with estrogens.	6279	0.48274	0.468417
DB00959	Methylprednisolone acetate	BRD-K35240538	methylprednisolone	approved;vet_approved;	D07AA01;D07CA02;D10AA02;H02AB04;H02BX01;S01CA08;	This compound belongs to the class of organic compounds known as 21-hydroxysteroids. These are steroids carrying a hydroxyl group at the 21-position of the steroid backbone.	Adjunctive therapy for short-term administration in rheumatoid arthritis.	6741	0.48265	0.441195
DB00242	Cladribine	BRD-K93034159	cladribine	approved;investigational;	L01BB04;	An antineoplastic agent used in the treatment of lymphoproliferative diseases including hairy-cell leukemia. [PubChem]	For the treatment of active hairy cell leukemia (leukemic reticuloendotheliosis) as defined by clinically significant anemia, neutropenia, thrombocytopenia, or disease-related symptoms. Also used as an alternative agent for the treatment of chronic lymphocytic leukemia (CLL), low-grade non-Hodgkin's lymphoma, and cutaneous T-cell lymphoma.	20279	0.481415	0.257632
DB04910	Oxibendazole	BRD-K52075715	oxibendazole	investigational;vet_approved;		Oxibendazole is a polymerase inhibitor in phase III trials for the treatment of helminth intestinal infections.	Investigated for use/treatment in infectious and parasitic disease (unspecified) and pediatric indications.	4622	0.48077	0.237555
DB00400	Griseofulvin	BRD-K08273968	griseofulvin	approved;vet_approved;	D01AA08;D01BA01;	An antifungal antibiotic. Griseofulvin may be given by mouth in the treatment of tinea infections. [PubChem]	For the treatment of ringworm infections of the skin, hair, and nails, namely: tinea corporis, tinea pedis, tinea cruris, tinea barbae, cradle cap or other conditions caused by &lt;i&gt;Trichophyton&lt;/i&gt; or &lt;i&gt;Microsporum&lt;/i&gt; fungi.	441140	0.48014	0.0730775
DB00645	Dyclonine hydrochloride	BRD-K72259270	dyclonine	approved;	N01BX02;R02AD04;	This compound belongs to the class of organic compounds known as phenylpropylamines. These are compounds containing a phenylpropylamine moiety, which consists of a phenyl group substituted at the third carbon by an propan-1-amine.	Used to provide topical anesthesia of accessible mucous membranes prior to examination, endoscopy or instrumentation, or other procedures involving the esophagus, larynx, mouth, pharynx or throat, respiratory tract or trachea, urinary tract, or vagina. Also used to suppress the gag reflex and/or other laryngeal and esophageal reflexes to facilitate dental examination or procedures (including oral…	3180	0.47974	0.240957
DB00397	Phenylpropanolamine hydrochloride	BRD-K27853494	phenylpropanolamine	approved;vet_approved;withdrawn;	R01BA01;R01BA51;	This compound belongs to the class of organic compounds known as phenylpropanes. These are organic compounds containing a phenylpropane moiety.	For the treatment of nasal congestion, control of urinary incontinence, priapism and obesity.	26934	0.47892	0.0759425
DB01165	Ofloxacin	BRD-A24228527	ofloxacin	approved;	J01MA01;J01RA09;S01AE01;S02AA16;	A synthetic fluoroquinolone (fluoroquinolones) antibacterial agent that inhibits the supercoiling activity of bacterial DNA gyrase, halting DNA replication. [PubChem]	For the treatment of infections (respiratory tract, kidney, skin, soft tissue, UTI), urethral and cervical gonorrhoea.	4583	0.478545	0.04616
DB00358	Mefloquine Hydrochloride	BRD-A89585551	mefloquine	approved;	P01BC02;P01BF02;	This compound belongs to the class of organic compounds known as quinolines and derivatives. These are compounds containing a quinoline moiety, which consists of a benzene ring fused to a pyrimidine ring to form benzo[b]azabenzene.	For the treatment of mild to moderate acute malaria caused by Mefloquineuine-susceptible strains of &lt;i&gt;Plasmodium falciparum&lt;/i&gt; (both chloroquine-susceptible and resistant strains) or by &lt;i&gt;Plasmodium vivax&lt;/i&gt;. Also for the prophylaxis of &lt;i&gt;Plasmodium falciparum&lt;/i&gt; and &lt;i&gt;Plasmodium vivax&lt;/i&gt; malaria infections, including prophylaxis of chloroqu…	4046	0.477465	0.433532
DB00909	Zonisamide	BRD-K48300629	zonisamide	approved;investigational;	N03AX15;	Zonisamide is a sulfonamide anticonvulsant approved for use as an adjunctive therapy in adults with partial-onset seizures. Zonisamide may be a carbonic anhydrase inhibitor although this is not one of the primary mechanisms of action. Zonisamide may act by blocking repetitive firing of voltage-gated sodium channels leading to a reduction of T-type calcium channel currents, or by binding allosteri…	For use as adjunctive treatment of partial seizures in adults with epilepsy.	5734	0.475785	0.0339725
DB01238	Aripiprazole lauroxil	BRD-K70358946	aripiprazole	approved;investigational;	N05AX12;	This compound belongs to the class of organic compounds known as phenylpiperazines. These are compounds containing a phenylpiperazine skeleton, which consists of a piperazine bound to a phenyl group.	For the treatment of schizophrenia and related psychotic disorders.	60795	0.475075	0.214755
DB00428	Streptozocin	BRD-K34411947	streptozotocin	approved;	L01AD04;	An antibiotic that is produced by Stretomyces achromogenes. It is used as an antineoplastic agent and to induce diabetes in experimental animals. [PubChem]	For the treatment of malignant neoplasms of pancreas (metastatic islet cell carcinoma).	29327	0.473375	0.266692
DB08899	Enzalutamide	BRD-K56851771	enzalutamide	approved;	L02BB04;	Enzalutamide is an androgen receptor inhibitor for the treatment of castration-resistant prostate cancer. FDA approved on August 31, 2012.	Enzalutamide is indicated for the treatment of patients with metastatic castration-resistant prostate cancer who have previously received docetaxel.	15951529	0.473275	0.064325
DB00205	Pyrimethamine Hydrochloride	BRD-K88429204	pyrimethamine	approved;vet_approved;	P01BD01;P01BD51;P01BF04;	This compound belongs to the class of organic compounds known as phenylpyrimidines. These are polycyclic aromatic compounds containing a benzene ring linked to a pyrimidine ring through a CC or CN bond. Pyrimidine is a 6-membered ring consisting of four carbon atoms and two nitrogen centers at the 1- and 3- ring positions.	For the treatment of toxoplasmosis and acute malaria; For the prevention of malaria in areas non-resistant to pyrimethamine	4993	0.47312	0.028455
DB04824	Phenolphthalein	BRD-K19227686	phenolphthalein	withdrawn;	A06AB04;	Phenolphthalein was withdrawn in Canada due to concerns with carcinogenicity in 1997.	Used for over a century as a laxative.	4764	0.47082	0.47082
DB05508	PTI-901	BRD-K88172511	naltrexone	investigational;		PTI-901 (low-dose naltrexone HCI) is Pain Therapeutics' novel drug candidate to treat men or women with IBS. It is believed that an imbalance of opioid activity in the gut contributes to the symptoms that comprise IBS. Such an imbalance may be triggered by emotional stress, metabolic disorders or intrinsic release of opioids from neurons in the gut. PTI-901 is the first in a new class of drugs ca…	Investigated for use/treatment in irritable bowel syndrome (IBS).	5485201	0.47067	0.41496
DB00643	Mebendazole	BRD-K77987382	mebendazole	approved;vet_approved;	P02CA01;P02CA51;	A benzimidazole that acts by interfering with carbohydrate metabolism and inhibiting polymerization of microtubules. [PubChem]	For the treatment of &lt;i&gt;Enterobius vermicularis&lt;/i&gt; (pinworm), &lt;i&gt;Trichuris trichiura&lt;/i&gt; (whipworm), &lt;i&gt;Ascaris lumbricoides&lt;/i&gt; (common roundworm), &lt;i&gt;Ancylostoma duodenale&lt;/i&gt; (common hookworm), &lt;i&gt;Necator americanus&lt;/i&gt; (American hookworm) in single or mixed infections.	4030	0.4706	0.0636475
DB06148	Mianserin hydrochloride	BRD-A19661776	mianserin	approved;	N06AX03;	This compound belongs to the class of organic compounds known as dibenzazepines. These are compounds with two benzene rings connected by an azepine ring. Azepine is an unsaturated seven-member heterocycle with one nitrogen atom replacing a carbon atom.	For the treatment of depression.	4184	0.468595	0.21508
DB00434	Cyproheptadine Hydrochloride	BRD-K28143534	cyproheptadine	approved;	R06AX02;	This compound belongs to the class of organic compounds known as dibenzocycloheptenes. These are compounds containing a dibenzocycloheptene moiety, which consists of two benzene connected by a cycloheptene ring.	For treatment of perennial and seasonal allergic rhinitis, vasomotor rhinitis, allergic conjunctivitis due to inhalant allergens and foods, mild uncomplicated allergic skin manifestations of urticaria and angioedema, amelioration of allergic reactions to blood or plasma, cold urticaria, dermatographism, and as therapy for anaphylactic reactions adjunctive to epinephrine.	2913	0.46504	0.391147
DB00973	Ezetimibe	BRD-K42260897	ezetimibe	approved;	C10AX09;C10BA02;C10BA05;C10BA06;	Ezetimibe is an anti-hyperlipidemic medication which is used to lower cholesterol levels. Specifically, it appears to bind to a critical mediator of cholesterol absorption, the Niemann-Pick C1-Like 1 (NPC1L1) protein on the gastrointestinal tract epithelial cells as well as in hepatocytes.	For use as adjunctive therapy to diet for the reduction of elevated total-C, LDL-C, and Apo B in patients with primary (heterozygous familial and non-familial) hypercholesterolemia.	150311	0.464725	0.0722725
DB00740	Riluzole Hydrochloride	BRD-K21283037	riluzole	approved;investigational;	N07XX02;	This compound belongs to the class of organic compounds known as benzothiazoles. These are organic compounds containing a benzene fused to a thiazole ring (a five-membered ring with four carbon atoms, one nitrogen atom and one sulfur atom).	For the treatment of amyotrophic lateral sclerosis (ALS, Lou Gehrig's Disease)	5070	0.46304	0.017905
DB08809	Dichloroacetic Acid	BRD-K13664374	dichloroacetic-acid	experimental;		Dichloroacetic acid, often abbreviated DCA, is an acid analogue of acetic acid in which two of the three hydrogen atoms of the methyl group have been replaced by chlorine atoms. The salts and esters of dichloroacetic acid are called dichloroacetates. Salts of DCA are used as drugs since they inhibit the enzyme pyruvate dehydrogenase kinase. Early reports of its activity against brain cancer cells…		6597	0.46243	0.224725
DB00591	Fluocinolone Acetonide	BRD-K94353609	fluocinolone	approved;investigational;vet_approved;	C05AA10;D07AC04;D07BC02;D07CC02;S01BA15;S01CA10;S02BA08;S02CA05;	A glucocorticoid derivative used topically in the treatment of various skin disorders. It is usually employed as a cream, gel, lotion, or ointment. It has also been used topically in the treatment of inflammatory eye, ear, and nose disorders. (From Martindale, The Extra Pharmacopoeia, 30th ed, p732). It is also being investigated by Sivida and Alimera, under the brand name Medidur, as a sustained…	For the relief of the inflammatory and pruritic manifestations of corticosteroid-responsive dermatoses. Also for the treatment of chronic non-infectious uveitis affecting the posterior segment of the eye (Retisert).	6215	0.46235	0.0685425
DB00350	Minoxidil	BRD-K14888893	minoxidil	approved;	C02DC01;D11AX01;	A potent direct-acting peripheral vasodilator (vasodilator agents) that reduces peripheral resistance and produces a fall in blood pressure. (From Martindale, The Extra Pharmacopoeia, 30th ed, p371)	For the treatment of severe hypertension and in the topical treatment (regrowth) of androgenic alopecia in males and females and stabilisation of hair loss in patients with androgenic alopecia.	4201	0.4621	0.230327
DB00999	Hydrochlorothiazide	BRD-K13078532	hydrochlorothiazide	approved;vet_approved;	C03AA03;C03AB03;C03AX01;C03EA01;C09DX01;C09DX03;C09XA52;C09XA54;	A thiazide diuretic often considered the prototypical member of this class. It reduces the reabsorption of electrolytes from the renal tubules. This results in increased excretion of water and electrolytes, including sodium, potassium, chloride, and magnesium. It has been used in the treatment of several disorders including edema, hypertension, diabetes insipidus, and hypoparathyroidism. [PubChem]	For the treatment of high blood pressure and management of edema.	3639	0.45971	0.396325
DB04104	3-Methyladenine	BRD-K81647657	BRD-K81647657	experimental;		regulation of mRNA 3'-end processing		1673	0.459535	0.416013
DB00455	Loratadine	BRD-K82795137	loratadine	approved;	R06AX13;	Loratadine is a derivative of azatadine and a second-generation histamine H1 receptor antagonist used in the treatment of allergic rhinitis and urticaria. Unlike most classical antihistamines (histamine H1 antagonists) it lacks central nervous system depressing effects such as drowsiness. [PubChem]	A self-medication that is used alone or in combination with pseudoephedrine sulfate for the symptomatic relief of seasonal allergic rhinitis. Also used for the symptomatic relief of pruritus, erythema, and urticaria associated with chronic idiopathic urticaria in patients (not for children under 6 unless directed by a clincian).	3957	0.45852	0.38821
DB00649	Stavudine	BRD-K93880783	stavudine	approved;investigational;	J05AF04;J05AR07;	A dideoxynucleoside analog that inhibits reverse transcriptase and has in vitro activity against HIV. [PubChem]	For the treatment of human immunovirus (HIV) infections.	18283	0.458	0.07535
DB00181	Baclofen	BRD-A84174873	baclofen	approved;	M03BX01;	Baclofen is a gamma-amino-butyric acid (GABA) derivative used as a skeletal muscle relaxant. Baclofen stimulates GABA-B receptors leading to decreased frequency and amplitude of muscle spasms. It is especially useful in treating muscle spasticity associated with spinal cord injury. It appears to act primarily at the spinal cord level by inhibiting spinal polysynaptic afferent pathways and, to a l…	For the alleviation of signs and symptoms of spasticity resulting from multiple sclerosis, particularly for the relief of flexor spasms and concomitant pain, clonus, and muscular rigidity.	2284	0.457475	0.443755
DB00900	Didanosine	BRD-K99063460	didanosine	approved;	J05AF02;	A dideoxynucleoside compound in which the 3&amp;#39;-hydroxy group on the sugar moiety has been replaced by a hydrogen. This modification prevents the formation of phosphodiester linkages which are needed for the completion of nucleic acid chains. Didanosine is a potent inhibitor of HIV replication, acting as a chain-terminator of viral DNA by binding to reverse transcriptase; ddI is then metabol…	For use, in combination with other antiretroviral agents, in the treatment of HIV-1 infection in adults.	50599	0.45744	0.225192
DB01143	Amifostine trihydrate	BRD-K73947551	amifostine	approved;investigational;	V03AF05;	This compound belongs to the class of organic compounds known as organothiophosphorus compounds. These are organic derivatives of thiophosphonic acid, thiophosphoric acid, dithiophosphoric acid, or phosphorotrithioic acid, or derivatives thereof. Thiophosphonic acid, dithiophosphoric acid, thiophosphoric acid, and phosphorotrithioic acid are thiophosphorus compounds with the formula OP(O)(=S), OP…	For reduction in the cumulative renal toxicity in patients with ovarian cancer (using cisplatin) and moderate to severe xerostomia in patients undergoing post-operative radiation treatment for head and neck cancer.	2141	0.45699	0.189131
DB08916	Afatinib Dimaleate	BRD-K66175015	afatinib	approved;	L01XE13;	This compound belongs to the class of organic compounds known as quinazolinamines. These are heterocyclic aromatic compounds containing a quianazoline moiety substituted by one or more amine groups.	Afatinib is a kinase inhibitor indicated for the first-line treatment of patient with metastatic non-small cell lung cancer (NSCLC) whose tumours have epidermal growth factor receptor (EGFR) exon 19 deletions or exon 21 (L858R) substitution mutations as detected by an FDA-approved test.	10184653	0.45675	0.265275
DB08313	nocodazole	BRD-K12539581	nocodazole	experimental;		organ regeneration		4122	0.45653	0.0402706
DB01418	Acenocoumarol	BRD-A65051990	acenocoumarol	approved;	B01AA07;	Acenocoumarol is a coumarin derivative used as an anticoagulant. Coumarin derivatives inhibit the reduction of vitamin K by vitamin K reductase. This prevents carboxylation of vitamin K-dependent clotting factors, II, VII, XI and X, and interferes with coagulation. Hematocrit, hemoglobin, international normalized ratio and liver panel should be monitored. Patients on acenocoumarol are prohibited …	For the treatment and prevention of thromboembolic diseases. More specifically, it is indicated for the for the prevention of cerebral embolism, deep vein thrombosis, pulmonary embolism, thromboembolism in infarction and transient ischemic attacks. It is used for the treatment of deep vein thrombosis and myocardial infarction.	54676537	0.456015	0.18221
DB07628	6-(2-fluorobenzyl)-2,4-dimethyl-4,6-dihydro-5H-thieno[2',3':4,5]pyrrolo[2,3-d]pyridazin-5-one	BRD-K81538844	BRD-K81538844	experimental;		extracellular matrix disassembly		654376	0.455925	0.192075
DB00567	Cefalexin hydrochloride	BRD-K90733503	cefalexin	approved;vet_approved;	J01DB01;	This compound belongs to the class of organic compounds known as n-acyl-alpha amino acids and derivatives. These are compounds containing an alpha amino acid (or a derivative thereof) which bears an acyl group at its terminal nitrogen atom.	For the treatment of respiratory tract infections caused by &lt;i&gt;Streptococcus pneumoniae&lt;/i&gt; and &lt;i&gt;Streptococcus pyogenes&lt;/i&gt;; otitis media due to &lt;i&gt;Streptococcus pneumoniae&lt;/i&gt;, &lt;i&gt;Haemophilus influenzae&lt;/i&gt;, &lt;i&gt;Staphylococcus aureus&lt;/i&gt;, &lt;i&gt;Streptococcus pyogenes&lt;/i&gt;, and &lt;i&gt;Moraxella catarrhalis&lt;/i&gt;; skin and …	27447	0.455915	0.224908
DB00809	Tropicamide	BRD-A79672927	tropicamide	approved;	S01FA06;S01FA56;	One of the muscarinic antagonists with pharmacologic action similar to atropine and used mainly as an ophthalmic parasympatholytic or mydriatic. [PubChem]	Indicated to induce mydriasis (dilation of the pupil) and cycloplegia (paralysis of the ciliary muscle of the eye) in diagnostic procedures, such as measurement of refractive errors and examination of the fundus of the eye.	5593	0.45577	0.0266525
DB00432	Trifluridine	BRD-K03243820	trifluridine	approved;	L01BC59;S01AD02;	An antiviral derivative of thymidine used mainly in the treatment of primary keratoconjunctivitis and recurrent epithelial keratitis due to herpes simplex virus. (From Martindale, The Extra Pharmacopoeia, 30th ed, p557)	Ophthalmic solution for the treatment of primay keratoconjunctivitis and recurrent epithelial keratitis due to herpes simplex virus, types 1 and 2.	6256	0.45549	0.230295
DB00564	Carbamazepine	BRD-K71799949	carbamazepine	approved;investigational;	N03AF01;	An anticonvulsant used to control grand mal and psychomotor or focal seizures. Its mode of action is not fully understood, but some of its actions resemble those of phenytoin; although there is little chemical resemblance between the two compounds, their three-dimensional structure is similar. [PubChem]	For the treatment of epilepsy and pain associated with true trigeminal neuralgia.	2554	0.454995	0.16227
DB07138	5-(2,6-dichlorophenyl)-2-[(2,4-difluorophenyl)sulfanyl]-6H-pyrimido[1,6-b]pyridazin-6-one	BRD-K91900765	VX-745	experimental;		organ regeneration		3038525	0.454925	0.148344
DB01622	Thioproperazine	BRD-K08619574	thioproperazine	approved;	N05AB08;	drug transmembrane transport	For the treatment of all types of acute and chronic schizophrenia, including those which did not respond to the usual neuroleptics; manic syndromes.	9429	0.45345	0.386113
DB01244	Bepridil hydrochloride	BRD-A91008255	bepridil	approved;withdrawn;	C08EA02;	This compound belongs to the class of organic compounds known as phenylmethylamines. These are compounds containing a phenylmethtylamine moiety, which consists of a phenyl group substituted by an methanamine.	For the treatment of hypertension, and chronic stable angina (classic effort-associated angina).	2351	0.45293	0.421185
DB01599	Probucol	BRD-K72029282	probucol	approved;	C10AX02;	A drug used to lower LDL and HDL cholesterol yet has little effect on serum-triglyceride or VLDL cholesterol. (From Martindale, The Extra Pharmacopoeia, 30th ed, p993).	Used to lower LDL and HDL cholesterol.	4912	0.452215	0.233363
DB00680	moricizine hydrochloride	BRD-K21548250	moracizine	approved;withdrawn;	C01BG01;	This compound belongs to the class of organic compounds known as phenothiazines. These are polycyclic aromatic compounds containing a phenothiazine moiety, which is a linear tricyclic system that consists of a two benzene rings joined by a para-thiazine ring.	Used to treat irregular heartbeats (arrhythmias) and maintain a normal heart rate.	34633	0.4506	0.417953
DB04846	Celiprolol	BRD-A95602221	celiprolol	approved;investigational;	C07AB08;	Celiprolol is indicated for the management of mild to moderate hypertension and effort-induced angina pectoris. It has a unique pharmacology: it is a selective β1 receptor antagonist, but a β2 receptor partial agonist. It is also a weak α2 receptor antagonist. In 2010 a clinical trial has suggested a use for this medication in the prevention of vascular complications of a rare inherited disease c…	Celiprolol is indicated for the management of mild to moderate hypertension and effort-induced angina pectoris.	2663	0.450455	0.182727
DB03044	1-(5-Tert-Butyl-2-P-Tolyl-2h-Pyrazol-3-Yl)-3-[4-(2-Morpholin-4-Yl-Ethoxy)-Naphthalen-1-Yl]-Urea	BRD-K74065929	doramapimod	experimental;		This compound belongs to the class of organic compounds known as l-alpha-amino acids. These are alpha amino acids which have the L-configuration of the alpha-carbon atom.		156422	0.449995	0.105044
DB00331	Metformin Hydrochloride	BRD-K79602928	metformin	approved;	A10BA02;A10BD02;A10BD03;A10BD05;A10BD07;A10BD08;A10BD10;A10BD11;A10BD13;A10BD14;A10BD15;A10BD16;A10BD17;A10BD18;A10BD20;	This compound belongs to the class of organic compounds known as biguanides. These are organic compounds containing two N-linked guanidines.	For use as an adjunct to diet and exercise in adult patients (18 years and older) with NIDDM. May also be used for the management of metabolic and reproductive abnormalities associated with polycystic ovary syndrome (PCOS). Jentadueto is for the treatment of patients when both linagliptin and metformin is appropriate.	4091	0.449785	0.397935
DB00527	Cinchocaine hydrochloride	BRD-K99121711	cinchocaine	approved;vet_approved;	C05AD04;D04AB02;N01BB06;S01HA06;S02DA04;	This compound belongs to the class of organic compounds known as quinoline carboxamides. These are quinolines in which the quinoline ring system is substituted by one or more carboxamide groups.	For production of local or regional anesthesia by infiltration techniques such as percutaneous injection and intravenous regional anesthesia by peripheral nerve block techniques such as brachial plexus and intercostal and by central neural techniques such as lumbar and caudal epidural blocks.	3025	0.449115	0.219087
DB04552	Niflumic Acid	BRD-K98763141	niflumic-acid	approved;	M01AX02;M02AA17;	An analgesic and anti-inflammatory agent used in the treatment of rheumatoid arthritis. [PubChem]	Used in the treatment of rheumatoid arthritis.	4488	0.44781	0.011445
DB00180	Flunisolide acetate	BRD-K49577446	flunisolide	approved;investigational;	R01AD04;R03BA03;	This compound belongs to the class of organic compounds known as 21-hydroxysteroids. These are steroids carrying a hydroxyl group at the 21-position of the steroid backbone.	For the maintenance treatment of asthma as a prophylactic therapy.	82153	0.446815	0.397505
DB00867	Ritodrine Hydrochloride	BRD-K51465424	ritodrine	approved;	G02CA01;	This compound belongs to the class of organic compounds known as phenethylamines. These are compounds containing a phenethylamine moiety, which consists of a phenyl group substituted at the second position by an ethan-1-amine.	For the treatment and prophylaxis of premature labour	33572	0.44651	0.230697
DB01166	Cilostazol	BRD-K67017579	cilostazol	approved;	B01AC23;	Cilostazol is a medication used in the alleviation of the symptom of intermittent claudication in individuals with peripheral vascular disease. It is manufactured by Otsuka Pharmaceutical Co. under the trade name Pletal. Although drugs similar to cilostazol have increased the risk of death in patients with congestive heart failure, studies of significant size have not addressed people without the…	For the reduction of symptoms of intermittent claudication (pain in the legs that occurs with walking and disappears with rest).	2754	0.44645	0.18856
DB08183	3-{(3R,4R)-4-methyl-3-[methyl(7H-pyrrolo[2,3-d]pyrimidin-4-yl)amino]piperidin-1-yl}-3-oxopropanenitrile	BRD-K31283835	tofacitinib	experimental;		organ regeneration		9926791	0.446315	0.429318
DB00363	Clozapine	BRD-K37289225	clozapine	approved;	N05AH02;	A tricyclic dibenzodiazepine, classified as an atypical antipsychotic agent. It binds several types of central nervous system receptors, and displays a unique pharmacological profile. Clozapine is a serotonin antagonist, with strong binding to 5-HT 2A/2C receptor subtype. It also displays strong affinity to several dopaminergic receptors, but shows only weak antagonism at the dopamine D2 receptor…	For use in patients with treatment-resistant schizophrenia.	2818	0.445835	0.195683
DB00970	Dactinomycin	BRD-K70578146	dactinomycin	approved;	L01DA01;	A compound composed of a two cyclic peptides attached to a phenoxazine that is derived from streptomyces parvullus. It binds to DNA and inhibits RNA synthesis (transcription), with chain elongation more sensitive than initiation, termination, or release. As a result of impaired mRNA production, protein synthesis also declines after dactinomycin therapy. (From AMA Drug Evaluations Annual, 1993, p2…	For the treatment of Wilms' tumor, childhood rhabdomyosarcoma, Ewing's sarcoma and metastatic, nonseminomatous testicular cancer as part of a combination chemotherapy and/or multi-modality treatment regimen	457193	0.445545	0.246555
DB01172	Kanamycin sulfate	BRD-K08327065	kanamycin	approved;vet_approved;	A07AA08;J01GB04;S01AA24;	This compound belongs to the class of organic compounds known as amino sugars. These are sugars having one alcoholic hydroxy group replaced by an amino group; systematically known as x-amino-x-deoxymonosaccharides. These compounds do not include Glycosylamines.	For treatment of infections where one or more of the following are the known or suspected pathogens: &lt;i&gt;E. coli&lt;/i&gt;, &lt;i&gt;Proteus&lt;/i&gt; species (both indole-positive and indole-negative), &lt;i&gt;E. aerogenes, K. pneumoniae, S. marcescens,&lt;/i&gt; and &lt;i&gt;Acinetobacter&lt;/i&gt; species.	6032	0.44543	0.205
DB00712	Flurbiprofen Sodium	BRD-A86044036	flurbiprofen	approved;investigational;	M01AE09;M02AA19;R02AX01;S01BC04;	This compound belongs to the class of organic compounds known as biphenyls and derivatives. These are organic compounds containing to benzene rings linked together by a C-C bond.	Flurbiprofen tablets are indicated for the acute or long-term symptomatic treatment of rheumatoid arthritis, osteorarthritis and anklosing spondylitis. It may also be used to treat pain associated with dysmenorrhea and mild to moderate pain accompanied by inflammation (e.g. bursitis, tendonitis, soft tissue trauma). Topical ophthalmic formulations may be used pre-operatively to prevent intraopera…	3394	0.44493	0.20409
DB00297	Bupivacaine hydrochloride	BRD-A01636364	bupivacaine	approved;investigational;	N01BB01;N01BB51;	This compound belongs to the class of organic compounds known as alpha amino acid amides. These are amide derivatives of alpha amino acids.	For the production of local or regional anesthesia or analgesia for surgery, for oral surgery procedures, for diagnostic and therapeutic procedures, and for obstetrical procedures.	2474	0.44405	0.20026
DB01234	Dexamethasone acetate	BRD-K38775274	dexamethasone	approved;investigational;vet_approved;	A01AC02;C05AA09;D07AB19;D07CB04;D07XB05;D10AA03;H02AB02;R01AD03;R01AD53;S01BA01;S01CA01;S01CB01;S02BA06;S02CA06;S03BA01;S03CA01;	This compound belongs to the class of organic compounds known as 21-hydroxysteroids. These are steroids carrying a hydroxyl group at the 21-position of the steroid backbone.		5743	0.442565	0.386815
DB02789	Pregnenolone	BRD-K43880410	pregnenolone	experimental;		A 21-carbon steroid, derived from CHOLESTEROL and found in steroid hormone-producing tissues. Pregnenolone is the precursor to GONADAL STEROID HORMONES and the adrenal CORTICOSTEROIDS. [PubChem]		8955	0.44207	0.1782
DB08621	Thiamphenicol	BRD-K79711234	thiamphenicol	experimental;	J01BA02;J01BA52;	neurological system process		27200	0.442055	0.0013075
DB01140	Cefadroxil hemihydrate	BRD-K63242551	cefadroxil	approved;vet_approved;withdrawn;	J01DB05;	This compound belongs to the class of organic compounds known as cephalosporins. These are compounds containing a 1,2-thiazine fused to a 2-azetidinone to for a oxo-5-thia-1-azabicyclo[4.2.0]oct-2-ene-2-carboxylic acid moiety or a derivative thereof.	For the treatment of the following infections (skin, UTI, ENT) caused by; &lt;i&gt;S. pneumoniae, H. influenzae, staphylococci, S. pyogenes&lt;/i&gt; (group A beta-hemolytic streptococci), &lt;i&gt;E. coli, P. mirabilis, Klebsiella&lt;/i&gt; sp, coagulase-negative staphylococci and &lt;i&gt;Streptococcus pyogenes&lt;/i&gt;	47965	0.4415	0.280288
DB00498	Phenindione	BRD-K70592963	phenindione	approved;	B01AA02;	An indandione that has been used as an anticoagulant. Phenindione has actions similar to warfarin, but it is now rarely employed because of its higher incidence of severe adverse effects. (From Martindale, The Extra Pharmacopoeia, 30th ed, p234)	For the treatment of pulmonary embolism, cardiomyopathy, atrial fibrillation and flutter, cerebral embolism, mural thrombosis, and thrombophili. Also used for anticoagulant prophylaxis.	4760	0.440835	0.241773
DB01219	Dantrolene Sodium	BRD-K81272440	dantrolene	approved;	M03CA01;	This compound belongs to the class of organic compounds known as hydantoins. These are heterocyclic compounds containing an imidazolidine substituted by ketone group at positions 2 and 4.	For use, along with appropriate supportive measures, for the management of the fulminant hypermetabolism of skeletal muscle characteristic of malignant hyperthermia crises in patients of all ages. Also used preoperatively, and sometimes postoperatively, to prevent or attenuate the development of clinical and laboratory signs of malignant hyperthermia in individuals judged to be malignant hyperthe…	6914273	0.43952	0.0360175
DB00302	Tranexamic Acid	BRD-K15014948	tranexamic-acid	approved;	B02AA02;	Antifibrinolytic hemostatic used in severe hemorrhage. [PubChem]	For use in patients with hemophilia for short term use (two to eight days) to reduce or prevent hemorrhage and reduce the need for replacement therapy during and following tooth extraction. It can also be used for excessive bleeding in menstruation, surgery, or trauma cases.	5526	0.438995	0.051075
DB00309	Vindesine Sulfate	BRD-K59753975	vindesine	approved;	L01CA03;	This compound belongs to the class of organic compounds known as vinca alkaloids. These are alkaloids with a dimeric chemical structure composed of an indole nucleus (catharanthine), and a dihydroindole nucleus (vindoline), joined together.	For the treatment of acute leukaemia, malignant lymphoma, Hodgkin's disease, acute erythraemia and acute panmyelosis	40839	0.43767	0.23789
DB06151	Acetylcysteine amide	BRD-K59058747	acetylcysteine	approved;	R05CB01;S01XA08;V03AB23;	This compound belongs to the class of organic compounds known as n-acyl-aliphatic-alpha amino acids. These are alpha amino acids carrying a N-acylated aliphatic chain.	Acetylcysteine is used mainly as a mucolytic and in the management of paracetamol (acetaminophen) overdose.	12035	0.437205	0.0226328
DB02733	Purvalanol	BRD-K41564320	purvalanol-b	experimental;		This compound belongs to the class of organic compounds known as (5'-&gt;5')-dinucleotides. These are dinucleotides where the two bases are connected via a (5'-&gt;5')-phosphodiester linkage.		448991	0.43686	0.261085
DB00845	Clofazimine	BRD-K56614220	clofazimine	approved;investigational;	J04BA01;	A fat-soluble riminophenazine dye used for the treatment of leprosy. It has been used investigationally in combination with other antimycobacterial drugs to treat Mycobacterium avium infections in AIDS patients. Clofazimine also has a marked anti-inflammatory effect and is given to control the leprosy reaction, erythema nodosum leprosum. (From AMA Drug Evaluations Annual, 1993, p1619)	For the treatment of lepromatous leprosy, including dapsone-resistant lepromatous leprosy and lepromatous leprosy complicated by erythema nodosum leprosum.	2794	0.436535	0.22339
DB08927	Amperozide	BRD-K52397688	amperozide	experimental;		Amperozide is an atypical antipsychotic of the diphenylbutylpiperazine class which acts as an antagonist at the 5-HT2A receptor. It does not block dopamine receptors as with most antipsychotic drugs, but does inhibit dopamine release, and alters the firing pattern of dopaminergic neurons. It was investigated for the treatment of schizophrenia in humans, but never adopted clinically, its main use …		73333	0.435555	0.435555
DB00336	Nitrofural	BRD-K79092138/BRD-K53815609	nitrofural	approved;vet_approved;	B05CA03;D08AF01;D09AA03;P01CC02;S01AX04;S02AA02;	A topical anti-infective agent effective against gram-negative and gram-positive bacteria. It is used for superficial wounds, burns, ulcers, and skin infections. Nitrofurazone has also been administered orally in the treatment of trypanosomiasis. [PubChem]	For the treatement of bacterial skin infections including pyodermas, infected dermatoses and infections of cuts, wounds, burns and ulcers due to susceptible organisms.	5447130	0.435105	0.243487
DB01136	Carvedilol phosphate	BRD-A10977446	carvedilol	approved;investigational;	C07AG02;	This compound belongs to the class of organic compounds known as carbazoles. These are compounds containing a three ring system containing a pyrrole ring fused on either side to a benzene ring.	For the treatment of mild or moderate (NYHA class II or III) heart failure of ischemic or cardiomyopathic origin.	2585	0.434825	0.212037
DB01119	Diazoxide	BRD-K73109821	diazoxide	approved;	C02DA01;V03AH01;	A benzothiadiazine derivative that is a peripheral vasodilator used for hypertensive emergencies. It lacks diuretic effect, apparently because it lacks a sulfonamide group. [PubChem]	Used parentally to treat hypertensive emergencies. Also used to treat hypoglycemia secondary to insulinoma.	3019	0.433985	0.247918
DB00525	Tolnaftate	BRD-K44273375	tolnaftate	approved;vet_approved;	D01AE18;	Tolnaftate is a synthetic over-the-counter anti-fungal agent. It may come as a cream, powder, spray, or liquid aerosol, and is used to treat jock itch, athlete's foot and ringworm. It is sold under several brand names, most notably Tinactin and Odor Eaters.	Tolnaftate topical is used to treat skin infections such as athlete's foot, jock itch, and ringworm infections. Tolnaftate is also used, along with other antifungals, to treat infections of the nails, scalp, palms, and soles of the feet. The powder and powder aerosol may be used to prevent athlete's foot.	5510	0.432995	0.416345
DB00938	Salmeterol xinafoate	BRD-A01320529	salmeterol	approved;	R03AC12;R03AK06;R03AK12;	This compound belongs to the class of organic compounds known as benzyl alcohols. These are organic compounds containing the phenylmethanol substructure.	For the treatment of asthma and chronic obstructive pulmonary disease (COPD).	5152	0.43286	0.426727
DB00892	Benoxinate hydrochloride	BRD-K04185004	oxybuprocaine	approved;	D04AB03;S01HA02;	This compound belongs to the class of organic compounds known as benzoic acid esters. These are ester derivatives of benzoic acid.	Used to temporarily numb the front surface of the eye so that the eye pressure can be measured or a foreign body removed.	4633	0.432775	0.0250575
DB00459	Acitretin	BRD-K90699611/BRD-K62012036	acitretin	approved;	D05BB02;	An oral retinoid effective in the treatment of psoriasis. It is the major metabolite of etretinate with the advantage of a much shorter half-life when compared with etretinate. [PubChem]	For the treatment of severe psoriasis in adults.	5284513	0.43234	0.171788
DB01086	Benzocaine hydrochloride	BRD-K75466013	benzocaine	approved;	C05AD03;D04AB04;N01BA05;R02AD01;	This compound belongs to the class of organic compounds known as benzoic acid esters. These are ester derivatives of benzoic acid.	For general use as a lubricant and topical anesthetic on esophagus, larynx, mouth, nasal cavity, rectum, respiratory tract or trachea, urinary tract, vagina. It is also used to suppress gag reflex.	2337	0.431905	0.224282
DB01645	Genistein	BRD-K43797669	genistein	investigational;		transcription initiation from RNA polymerase II promoter	Currently Genistein is being studied in clinical trials as a treatment for prostate cancer.	5280961	0.431795	0.106879
DB01393	Bezafibrate	BRD-K46018455	bezafibrate	approved;	C10AB02;	Antilipemic agent that lowers cholesterol and triglycerides. It decreases low density lipoproteins and increases high density lipoproteins. [PubChem]	For the treatment of primary hyperlipidaemia types IIa, IIb, III, IV and V (Fredrickson classification) corresponding to groups I, II and III of the European Atherosclerosis Society guidelines - when diet alone or improvements in lifestyle such as increased exercise or weight reduction do not lead to an adequate response. Also for the treatment of secondary hyperlipidaemias, e.g. severe hypertrig…	39042	0.43123	0.420913
DB01104	Sertraline Hydrochloride	BRD-K82036761	sertraline	approved;	N06AB06;	This compound belongs to the class of organic compounds known as tametralines. These are compounds containing a tametraline moiety, which consists of a tetrahydronaphthalene linked to a phenyl group to form N-methyl-4-phenyl-1,2,3,4-tetrahydronaphthalen-1-amine skeleton.	For the management of major depressive disorder, posttraumatic stress disorder, obsessive-compulsive disorder, panic disorder with or without agoraphobia, premenstrual dysphoric disorder, social phobia, premature ejaculation, and vascular headaches.	68617	0.43073	0.240313
DB01273	Varenicline tartrate	BRD-K18855837	varenicline	approved;investigational;	N07BA03;	This compound belongs to the class of organic compounds known as benzazepines. These are organic compounds containing a benzene ring fused to an azepine ring (unsaturated seven-membered heterocycle with one nitrogen atom replacing a carbon atom).	For use as an aid in smoking cessation.	5310966	0.43023	0.207265
DB00283	Clemastine fumarate	BRD-K30240666	clemastine	approved;	D04AA14;R06AA04;R06AA54;	This compound belongs to the class of organic compounds known as diphenylmethanes. These are compounds containing a diphenylmethane moiety, which consists of a methane wherein two hydrogen atoms are replaced by two phenyl groups.	For the relief of symptoms associated with allergic rhinitis such as sneezing, rhinorrhea, pruritus and acrimation. Also for the management of mild, uncomplicated allergic skin manifestations of urticaria and angioedema. Used as self-medication for temporary relief of symptoms associated with the common cold.	26987	0.430065	0.426737
DB00806	Pentoxifylline	BRD-K57569181	pentoxifylline	approved;investigational;	C04AD03;	A methylxanthine derivative that inhibits phosphodiesterase and affects blood rheology. It improves blood flow by increasing erythrocyte and leukocyte flexibility. It also inhibits platelet aggregation. Pentoxifylline modulates immunologic activity by stimulating cytokine production. [PubChem]	For the treatment of patients with intermittent lameness or immobility arising from chronic occlusive arterial disease of the limbs.	4740	0.429775	0.0571108
DB06228	Rivaroxaban	BRD-K37130656	rivaroxaban	approved;	B01AF01;	Rivaroxaban is an anticoagulant and the first orally active direct factor Xa inhibitor. Unlike warfarin, routine lab monitoring of INR is not necessary. However there is no antidote available in the event of a major bleed. Only the 10 mg tablet can be taken without regard to food. The 15 mg and 20 mg tablet should be taken with food. FDA approved on July 1, 2011.		9875401	0.429035	0.182113
DB08078	{4-[3-(4-acetyl-3-hydroxy-2-propylphenoxy)propoxy]phenoxy}acetic acid	BRD-K98372770	L-2167	experimental;		receptor-mediated endocytosis		6603901	0.42819	0.166595
DB00452	Framycetin sulfate	BRD-K71013094	neomycin	approved;	D09AA01;R01AX08;S01AA07;	This compound belongs to the class of organic compounds known as amino sugars. These are sugars having one alcoholic hydroxy group replaced by an amino group; systematically known as x-amino-x-deoxymonosaccharides. These compounds do not include Glycosylamines.	For the treatment of bacterial blepharitis, bacterial bonjunctivitis, corneal injuries, corneal ulcers and meibomianitis. For the prophylaxis of ocular infections following foreign body removal	8378	0.42766	0.412672
DB08439	Parecoxib	BRD-K13800121	parecoxib	approved;	M01AH04;	Parecoxib is a water-soluble and injectable prodrug of valdecoxib. It is marketed as Dynastat in the European Union. Parecoxib is a COX2 selective inhibitor in the same category as celecoxib (Celebrex) and rofecoxib (Vioxx). As it is injectable, it can be used perioperatively when patients are unable to take oral medications. It is approved through much of Europe for short term perioperative pain…	Used for short term perioperative pain control.	119828	0.427515	0.232992
DB01088	Iloprost	BRD-A45664787	iloprost	approved;investigational;	B01AC11;	Iloprost is a synthetic analogue of prostacyclin PGI2. Iloprost dilates systemic and pulmonary arterial vascular beds. It is used to treat pulmonary arterial hypertension (PAH).	Used for the treatment of pulmonary arterial hypertension.	5311181	0.425585	0.051195
DB00394	Beclomethasone dipropionate monohydrate	BRD-K97810537	beclometasone	approved;investigational;	A07EA07;D07AC15;D07CC04;R01AD01;R03AK08;R03BA01;	This compound belongs to the class of organic compounds known as gluco/mineralocorticoids, progestogins and derivatives. These are steroids with a structure based on a hydroxylated prostane moiety.	Used in the maintenance treatment of asthma as prophylactic therapy in patients 5 years of age and older, and in treating symptoms for allergic rhinitis (seasonal or perennial) in patients 12 years of age and older. Also being investigated for oral treatment in mild-to-moderate Crohn's disease of ileal or ileal-right colonic localisation and for topical use mild-to-moderate graft versus host dise…	21700	0.42534	0.048655
DB00590	Doxazosin	BRD-A13188892	doxazosin	approved;	C02CA04;	Doxazosin is a quinazoline-derivative that selectively antagonizes postsynaptic &amp;alpha;&lt;sub&gt;1&lt;/sub&gt;-adrenergic receptors. It may be used to mild to moderate hypertension and in the management of symptomatic benign prostatic hyperplasia (BPH). &amp;alpha;&lt;sub&gt;1&lt;/sub&gt;-Receptors mediate contraction and hypertrophic growth of smooth muscle cells. Antagonism of these recept…	For treatment and management of mild to moderate hypertension and urinary obstruction symptoms caused by BPH.	3157	0.424395	0.20408
DB01406	Danazol	BRD-K48970916	danazol	approved;	G03XA01;	A synthetic steroid with antigonadotropic and anti-estrogenic activities that acts as an anterior pituitary suppressant by inhibiting the pituitary output of gonadotropins. It possesses some androgenic properties. Danazol has been used in the treatment of endometriosis and some benign breast disorders. [PubChem]	For the treatment of endometriosis and fibrocystic breast disease (in patients unresponsive to simple measures). Also used for the prophylactic treatment of all types of hereditary angioedema in males and females.	28417	0.42439	0.201467
DB00451	Levothyroxine sodium	BRD-K30685142	levothyroxine	approved;	H03AA01;	This compound belongs to the class of organic compounds known as diphenylethers. These are aromatic compounds containing two benzene rings linked to each other through an ether group.	For use alone or in combination with antithyroid agents to treat hypothyroidism, goiter, chronic lymphocytic thyroiditis, myxedema coma, and stupor.	5819	0.42424	0.222055
DB00844	Nalbuphine hydrochloride	BRD-K66404838	nalbuphine	approved;	N02AF02;	This compound belongs to the class of organic compounds known as morphinans. These are polycyclic compounds with a four-ring skeleton with three condensed six-member rings forming a partially hydrogenated phenanthrene moiety, one of which is aromatic while the two others are alicyclic.	For the relief of moderate to severe pain.	5311304	0.4237	0.374375
DB00130	L-Glutamine	BRD-K83896451	glutamine	approved;investigational;nutraceutical;	A16AA03;	A non-essential amino acid present abundantly throughout the body and is involved in many metabolic processes. It is synthesized from glutamic acid and ammonia. It is the principal carrier of nitrogen in the body and is an important energy source for many cells. [PubChem]	Used for nutritional supplementation, also for treating dietary shortage or imbalance.	5961	0.42322	0.0678447
DB00312	Pentobarbital Sodium	BRD-A44448661	pentobarbital	approved;vet_approved;	N05CA01;	This compound belongs to the class of organic compounds known as barbituric acid derivatives. These are compounds containing a perhydropyrimidine ring substituted at C-2, -4 and -6 by oxo groups.	For the short-term treatment of insomnia.	4737	0.42307	0.386155
DB00389	Carbimazole	BRD-K87156652	carbimazole	approved;	H03BB01;	An imidazole antithyroid agent. Carbimazole is metabolized to methimazole, which is responsible for the antithyroid activity. [PubChem]	For the treatment of hyperthyroidism and thyrotoxicosis. It is also used to prepare patients for thyroidectomy.	31072	0.42287	0.415055
DB00357	Aminoglutethimide	BRD-A25234499	aminoglutethimide	approved;	L02BG01;	An aromatase inhibitor that produces a state of medical adrenalectomy by blocking the production of adrenal steroids. It also blocks the conversion of androgens to estrogens. Aminoglutethimide has been used in the treatment of advanced breast and prostate cancer. It was formerly used for its weak anticonvulsant properties. (From Martindale, The Extra Pharmacopoeia, 30th ed, p454)	For the suppression of adrenal function in selected patients with Cushing's syndrome, malignant neoplasm of the female breast, and carcinoma in situ of the breast.	2145	0.422665	0.26076
DB00537	Ciprofloxacin Hydrochloride	BRD-K04804440	ciprofloxacin	approved;investigational;	J01MA02;J01RA10;J01RA11;J01RA12;S01AE03;S02AA15;S03AA07;	This compound belongs to the class of organic compounds known as quinoline carboxylic acids. These are quinolines in which the quinoline ring system is substituted by a carboxyl group at one or more positions.	For the treatment of the following infections caused by susceptible organisms: urinary tract infections, acute uncomplicated cystitis, chronic bacterial prostatitis, lower respiratory tract infections, acute sinusitis, skin and skin structure infections, bone and joint infections, complicated intra-abdominal infections (used in combination with metronidazole), infectious diarrhea, typhoid fever (…	2764	0.422145	0.041395
DB07423	(2S)-3-[4-(acetylamino)phenoxy]-2-hydroxy-2-methyl-N-[4-nitro-3-(trifluoromethyl)phenyl]propanamide	BRD-K82164249	andarine	experimental;		intracellular receptor signaling pathway		9824562	0.422055	0.195362
DB00822	Disulfiram	BRD-K32744045	disulfiram	approved;	N07BB01;P03AA04;P03AA54;	A carbamate derivative used as an alcohol deterrent. It is a relatively nontoxic substance when administered alone, but markedly alters the intermediary metabolism of alcohol. When alcohol is ingested after administration of disulfiram, blood acetaldehyde concentrations are increased, followed by flushing, systemic vasodilation, respiratory difficulties, nausea, hypotension, and other symptoms (a…	For the treatment and management of chronic alcoholism	3117	0.421855	0.24678
DB00313	Divalproex sodium	BRD-K41260949	valproic-acid	approved;investigational;	N03AG01;	This compound belongs to the class of organic compounds known as methyl-branched fatty acids. These are fatty acids with an acyl chain that has a methyl branch. Usually, they are saturated and contain only one or more methyl group. However, branches other than methyl may be present.	For treatment and management of seizure disorders, mania, and prophylactic treatment of migraine headache. In epileptics, valproic acid is used to control absence seizures, tonic-clonic seizures (grand mal), complex partial seizures, and the seizures associated with Lennox-Gastaut syndrome.	3121	0.421355	0.135044
DB00890	Dienestrol	BRD-K95309561	dienestrol	approved;	G03CB01;G03CC02;	Dienestrol is a synthetic, non-steroidal estrogen. It is an estrogen receptor agonist. Estrogens work partly by increasing a normal clear discharge from the vagina and making the vulva and urethra healthy. Using or applying an estrogen relieves or lessens: dryness and soreness in the vagina, itching, redness, or soreness of the vulva. Conditions that are treated with vaginal estrogens include a g…	For use in the treatment of atrophic vaginitis and kraurosis vulvae.	667476	0.421195	0.107152
DB00978	Lomefloxacin hydrochloride	BRD-A75850590	lomefloxacin	approved;	J01MA07;S01AE04;	This compound belongs to the class of organic compounds known as quinoline carboxylic acids. These are quinolines in which the quinoline ring system is substituted by a carboxyl group at one or more positions.	For the treatment of bacterial infections of the respiratory tract (chronic bronchitis) and urinary tract, and as a pre-operative prophylactic to prevent urinary tract infection caused by: &lt;i&gt;S.pneumoniae&lt;/i&gt;, &lt;i&gt;H.influenzae&lt;/i&gt;, &lt;i&gt;S.aureus&lt;/i&gt;, &lt;i&gt;P.aeruginosa&lt;/i&gt;, &lt;i&gt;E. cloacae&lt;/i&gt;, &lt;i&gt;P. mirabilis&lt;/i&gt;, &lt;i&gt;C. civers…	3948	0.42076	0.374695
DB01110	Miconazole nitrate	BRD-A82396632	miconazole	approved;investigational;vet_approved;	A01AB09;A07AC01;D01AC02;D01AC52;G01AF04;J02AB01;S02AA13;	This compound belongs to the class of organic compounds known as benzylethers. These are aromatic ethers with the general formula ROCR' (R = alkyl, aryl; R'=benzene).	For topical application in the treatment of tinea pedis (athlete&amp;rsquo;s foot), tinea cruris, and tinea corporis caused by &lt;i&gt;Trichophyton rubrum&lt;/i&gt;, &lt;i&gt;Trichophyton mentagrophytes&lt;/i&gt;, and &lt;i&gt;Epidermophyton floccosum&lt;/i&gt;, in the treatment of cutaneous candidiasis (moniliasis), and in the treatment of tinea versicolor.	4189	0.42056	0.39757
DB00744	Zileuton	BRD-A56359832	zileuton	approved;investigational;withdrawn;		Leukotrienes are substances that induce numerous biological effects including augmentation of neutrophil and eosinophil migration, neutrophil and monocyte aggregation, leukocyte adhesion, increased capillary permeability, and smooth muscle contraction. These effects contribute to inflammation, edema, mucus secretion, and bronchoconstriction in the airways of asthmatic patients. Zileuton relieves …	For the prophylaxis and chronic treatment of asthma in adults and children 12 years of age and older.	60490	0.419505	0.244347
DB00393	Nimodipine	BRD-A24891640/BRD-A58048407	nimodipine	approved;	C08CA06;	Nimodipine is a 1,4-dihydropyridine calcium channel blocker. It acts primarily on vascular smooth muscle cells by stabilizing voltage-gated L-type calcium channels in their inactive conformation. By inhibiting the influx of calcium in smooth muscle cells, nimodipine prevents calcium-dependent smooth muscle contraction and subsequent vasoconstriction. Compared to other calcium channel blocking age…	For use as an adjunct to improve neurologic outcome following subarachnoid hemorrhage (SAH) from ruptured intracranial berry aneurysms by reducing the incidence and severity of ischemic deficits.	4497	0.419325	0.225501
DB01029	Irbesartan	BRD-K60038276	irbesartan	approved;investigational;	C09CA04;C09DA04;C09DB05;	Irbesartan is an angiotensin receptor blocker (ARB) used mainly for the treatment of hypertension. It competes with angiotensin II for binding at the AT1 receptor subtype. Unlike ACE inhibitors, ARBs do not have the adverse effect of dry cough. The use of ARBs is pending revision due to findings from several clinical trials suggesting that this class of drugs may be associated with a small increa…	For the treatment of hypertension, as well as diabetic nephropathy with an elevated serum creatinine and proteinuria (&amp;gt;300 mg/day) in patients with type 2 diabetes and hypertension. Irbesartan is also used as a second line agent in the treatment of congestive heart failure.	3749	0.418925	0.24535
DB00480	Lenalidomide	BRD-A17883755	lenalidomide	approved;	L04AX04;	Lenalidomide (initially known as CC-5013 and marketed as Revlimid? by Celgene) is a derivative of thalidomide introduced in 2004. It was initially intended as a treatment for multiple myeloma, for which thalidomide is an accepted therapeutic modality, but has also shown efficacy in the hematological disorders known as the myelodysplastic syndromes. [Wikipedia] FDA approved on December 27, 2005.	Lenalidomide is indicated for the treatment of multiple myeloma in combination with dexamethasone. It is also indicated for the treatment of patients with transfusion-dependent anemia due to low- or intermediate- risk myelodysplastic syndromes (MDS) associated with a deletion 5q cytogenetic abnormality with or without additional cytogenetic abnormalities.	216326	0.418915	0.2255
DB00722	Lisinopril	BRD-K67966701	lisinopril	approved;investigational;	C09AA03;C09BA03;C09BB03;C10BX07;	Lisinopril is a potent, competitive inhibitor of angiotensin-converting enzyme (ACE), the enzyme responsible for the conversion of angiotensin I (ATI) to angiotensin II (ATII). ATII regulates blood pressure and is a key component of the renin-angiotensin-aldosterone system (RAAS). Lisinopril may be used to treat hypertension and symptomatic congestive heart failure, to improve survival in certain…	For the treatment of hypertension and symptomatic congestive heart failure. May be used in conjunction with thrombolytic agents, aspirin and/or &amp;beta;-blockers to improve survival in hemodynamically stable individuals following myocardial infarction. May be used to slow the progression of renal disease in hypertensive patients with diabetes mellitus and microalbuminuria or overt nephropathy.	5362119	0.418845	0.233245
DB00734	Risperidone	BRD-K53857191	risperidone	approved;investigational;	N05AX08;	Risperidone, a benzisoxazole derivative, is an atypical antipsychotic drug with high affinity for 5-hydrotryptamine (5-HT) and dopamine D2 receptors. It is used primarily in the management of schizophrenia, inappropriate behavior in severe dementia and manic episodes associated with bipolar I disorder. Risperidone is effective for treating the positive and negative symptoms of schizophrenia owing…	For the treatment of schizophrenia in adults and in adolescents, ages 13 to 17, and for the short-term treatment of manic or mixed episodes of bipolar I disorder in children and adolescents ages 10 to 17. May also be used to manage symptoms of inappropriate behavior due to aggression and/or psychosis in patients with severe dementia.	5073	0.418425	0.223087
DB01041	Thalidomide	BRD-A93255169	thalidomide	approved;investigational;withdrawn;	L04AX02;	A piperidinyl isoindole originally introduced as a non-barbiturate hypnotic, but withdrawn from the market due to teratogenic effects. It has been reintroduced and used for a number of immunological and inflammatory disorders. Thalidomide displays immunosuppresive and anti-angiogenic activity. It inhibits release of tumor necrosis factor-alpha from monocytes, and modulates other cytokine action. …	For the acute treatment of the cutaneous manifestations of moderate to severe erythema nodosum leprosum (ENL). Also for use as maintenance therapy for prevention and suppression of the cutaneous manifestations of ENL recurrence.	5426	0.418165	0.18935
DB00709	3-TC	BRD-K02992638	lamivudine	approved;investigational;	J05AF05;J05AR01;J05AR02;J05AR04;J05AR05;J05AR07;J05AR11;J05AR12;J05AR13;J05AR16;	This compound belongs to the class of organic compounds known as 3'-thia pyrimidine nucleosides. These are nucleoside analogues with a structure that consists of a pyrimidine base, which is N-substituted at the 1-position with a 3'-thia derivative (1,3-oxazolidine) of the ribose moiety that is characteristic of nucleosides.	For the treatment of HIV infection and chronic hepatitis B (HBV).	60825	0.41792	0.060855
DB01182	Propafenone hydrochloride	BRD-A26334849	propafenone	approved;	C01BC03;	This compound belongs to the class of organic compounds known as chalcones and dihydrochalcones. These are organic compounds containing 1,3-Diphenylpropenone (benzylideneacetophenone), ArCH=CH(=O)Ar,or its derivatives formed by substitution.	Used to prolong the time to recurrence of paroxysmal atrial fibrillation/flutter (PAF) associated with disabling symptoms in patients without structural heart disease. Also used for the treatment of life-threatening documented ventricular arrhythmias, such as sustained ventricular tachycardia.	4932	0.417805	0.185292
DB02052	Indirubin-3'-Monoxime	BRD-K53959060	indirubin	experimental;		cysteine-type endopeptidase activity		5326739	0.417085	0.132835
DB01059	Norfloxacin	BRD-K11196887	norfloxacin	approved;	J01MA06;J01RA13;S01AE02;	A synthetic fluoroquinolone (fluoroquinolones) with broad-spectrum antibacterial activity against most gram-negative and gram-positive bacteria. Norfloxacin inhibits bacterial DNA gyrase. [PubChem]	For the treatment of urinary tract infection	4539	0.415955	0.211157
DB01056	Tocainide hydrochloride	BRD-A92670106	tocainide	approved;	C01BB03;	This compound belongs to the class of organic compounds known as alpha amino acid amides. These are amide derivatives of alpha amino acids.	For the treatment of documented ventricular arrhythmias, such as sustained ventricular tachycardia, that, in the judgment of the physician, are life-threatening.	38945	0.41586	0.229518
DB00834	Mifepristone	BRD-K37270826	mifepristone	approved;investigational;	G03XB01;G03XB51;	A progestational and glucocorticoid hormone antagonist. Its inhibition of progesterone induces bleeding during the luteal phase and in early pregnancy by releasing endogenous prostaglandins from the endometrium or decidua. As a glucocorticoid receptor antagonist, the drug has been used to treat hypercortisolism in patients with nonpituitary cushing syndrome [PubChem]. The two marketed forms of mi…	For the medical termination of intrauterine pregnancy through 49 days' pregnancy. Also indicated to control hyperglycemia secondary to hypercortisolism in adult patients with endogenous Cushing's syndrome who have type 2 diabetes mellitus or glucose intolerance and are not candidates for surgery or have had unsuccessful surgery.	55245	0.41579	0.226722
DB00449	Dipivefrin Hydrochloride	BRD-A47494775	dipivefrine	approved;	S01EA02;	This compound belongs to the class of organic compounds known as phenol esters. These are aromatic compounds containing a benzene ring substituted by a hydroxyl group and an ester group.	Dipivefrin is a prodrug which is used as initial therapy for the control of intraocular pressure in chronic open-angle glaucoma.	3105	0.415315	0.366822
DB00745	Modafinil	BRD-A16332958	modafinil	approved;investigational;	N06BA07;	Modafinil is a stimulant drug marketed as a 'wakefulness promoting agent' and is one of the stimulants used in the treatment of narcolepsy. Narcolepsy is caused by dysfunction of a family of wakefulness-promoting and sleep-suppressing peptides, the orexins, whose neurons are activated by modafinil. The prexin neuron activation is associated with psychoactivation and euphoria. The exact mechanism …	To improve wakefulness in patients with excessive daytime sleepiness (EDS) associated with narcolepsy.	4236	0.41501	0.02072
DB01198	Zopiclone	BRD-A34309505	zopiclone	approved;	N05CF01;	Zopiclone is a novel hypnotic agent used in the treatment of insomnia. Its mechanism of action is based on modulating benzodiazepine receptors. In addition to zopiclone's benzodiazepine pharmacological properties it also has some barbiturate like properties.	For the short-term treatment of insomnia.	5735	0.414765	0.18643
DB01222	Budesonide	BRD-A34299591	budesonide	approved;	A07EA06;D07AC09;R01AD05;R03AK07;R03AK12;R03BA02;	Budesonide is a glucocorticoid used in the management of asthma, the treatment of various skin disorders, and allergic rhinitis. [PubChem] The extended release oral tablet, marketed as Uceris, was FDA approved on January 14, 2013 for the management of ulcerative colitis. Budesonide is provided as a mixture of two epimers (22R and 22S). Interestingly, the 22R form is two times more active than the…	The oral capsule is used for the treatment of mild to moderate active Crohn's disease. The oral tablet is used for induction of remission in patients with active, mild to moderate ulcerative colitis. The oral inhalation formulation is used for the treatment of asthma, non-infectious rhinitis (including hay fever and other allergies), and for treatment and prevention of nasal polyposis.	5281004	0.414635	0.389375
DB04946	Iloperidone	BRD-K48722833	iloperidone	approved;	N05AX14;	Iloperidone is an atypical antipsychotic for the treatment of schizophrenia symptoms. Hoechst Marion Roussel Inc. made initial inquiries into the drug; however, in May 1996, they discontinued research, and in June 1997 gave research rights to Titan Pharmaceuticals. Titan then handed over worldwide development, manufacturing and marketing rights to Novartis in August 1998. On June 9, 2004, Titan P…	Treatment of acute schizophrenia.	71360	0.41433	0.02246
DB08877	Ruxolitinib Phosphate	BRD-K53972329	ruxolitinib	approved;	L01XE18;	This compound belongs to the class of organic compounds known as pyrrolopyrimidines. These are compounds containing a pyrrolopyrimidine moiety, which consists of a pyrrole ring fused to a pyrimidine. Pyrrole is 5-membered ring consisting of four carbon atoms and one nitrogen atom. Pyrimidine is a 6-membered ring consisting of four carbon atoms and two nitrogen centers at the 1- and 3- ring positi…	Treatment of intermediate or high-risk myelofibrosis, including primary myelofibrosis, post-polycythemia vera (post-PV) myelofibrosis and post-essential thrombocythemia (post-ET) myelofibrosis. [Lexicomp] Myeolofibrosis is the proliferation of abnormal bone marrow stem cells which cause fibrosis (the excessive formation of connective tissue).	25126798	0.412825	0.0122544
DB00891	Sulfapyridine	BRD-K41406082	sulfapyridine	approved;	J01EB04;	Antibacterial, potentially toxic, and previously used to treat certain skin diseases. No longer prescribed.	For the treatment of dermatitis herpetiformis, benign mucous membrane pemphigoid and pyoderma gangrenosum	5336	0.41217	0.368038
DB01016	Glyburide	BRD-K36927236	glibenclamide	approved;	A10BB01;	Glyburide is an oral antihyperglycemic agent used for the treatment of non-insulin-dependent diabetes mellitus (NIDDM). It belongs to the sulfonylurea class of insulin secretagogues, which act by stimulating &amp;beta; cells of the pancreas to release insulin. Sulfonylureas increase both basal insulin secretion and meal-stimulated insulin release. Medications in this class differ in their dose, r…	Indicated as an adjunct to diet to lower the blood glucose in patients with NIDDM whose hyperglycemia cannot be satisfactorily controlled by diet alone.	3488	0.41129	0.154168
DB00353	Methylergometrine maleate	BRD-K34685430	methylergometrine	approved;	G02AB01;G02AC01;	This compound belongs to the class of organic compounds known as lysergamides. These are amides of Lysergic acids.	For the prevention and control of excessive bleeding following vaginal childbirth	8226	0.410845	0.202527
DB01060	Amoxicillin sodium	BRD-K55044200	amoxicillin	approved;vet_approved;	A02BD01;A02BD03;A02BD04;A02BD05;A02BD06;A02BD07;A02BD10;A02BD11;J01CA04;J01CR02;	This compound belongs to the class of organic compounds known as penicillins. These are organic compounds containing the penicillin core structure, which is structurally characterized by a penam ring bearing two methyl groups at position 2, and an amide group at position 6 [starting from the sulfur atom at position 1].	For the treatment of infections of the ear, nose, and throat, the genitourinary tract, the skin and skin structure, and the lower respiratory tract due to susceptible (only b-lactamase-negative) strains of &lt;i&gt;Streptococcus&lt;/i&gt; spp. (a- and b-hemolytic strains only), &lt;i&gt;S. pneumoniae&lt;/i&gt;, &lt;i&gt;Staphylococcus&lt;/i&gt; spp., &lt;i&gt;H. influenzae&lt;/i&gt;, &lt;i&gt;E. …	33613	0.41015	0.0450225
DB00787	Aciclovir Sodium	BRD-K32318651	acyclovir	approved;	D06BB03;D06BB53;J05AB01;S01AD03;	This compound belongs to the class of organic compounds known as hypoxanthines. These are compounds containing the purine derivative 1H-purin-6(9H)-one. Purine is a bicyclic aromatic compound made up of a pyrimidine ring fused to an imidazole ring.	For the treatment and management of herpes zoster (shingles), genital herpes, and chickenpox.	2022	0.41003	0.02669
DB01536	4-Androstenedione	BRD-K32610195	androstenedione	experimental;illicit;		A delta-4 C19 steroid that is produced not only in the testis, but also in the ovary and the adrenal cortex. Depending on the tissue type, androstenedione can serve as a precursor to testosterone as well as estrone and estradiol. [PubChem]		6128	0.408525	0.376858
DB08263	N-(carboxycarbonyl)-D-phenylalanine	BRD-K76188144	BRD-K76188144	experimental;		N-(carboxycarbonyl)-D-phenylalanine is a solid. This compound belongs to the n-acyl-alpha amino acids. These are compounds containing an alpha amino acid which bears an acyl group at its terminal nitrogen atom. It targets the protein hypoxia-inducible factor 1-alpha inhibitor.		5288998	0.40544	0.194782
DB01606	Tazobactam sodium	BRD-K14312455	tazobactam	approved;	J01CG02;	This compound belongs to the class of organic compounds known as alpha amino acids and derivatives. These are amino acids in which the amino group is attached to the carbon atom immediately adjacent to the carboxylate group (alpha carbon), or a derivative thereof.	Used in combination with piperacillin to broaden the spectrum of piperacillin antibacterial action.	123630	0.40525	0.37213
DB00916	Metronidazole hydrochloride	BRD-K52020312	metronidazole	approved;	A01AB17;A02BD01;A02BD02;A02BD03;A02BD08;A02BD11;D06BX01;G01AF01;J01RA03;J01RA04;J01RA10;J01XD01;P01AB01;P01AB51;	This compound belongs to the class of organic compounds known as nitroimidazoles. These are compounds containing an imidazole ring which bears a nitro group.	For the treatment of anaerobic infections and mixed infections, surgical prophylaxis requiring anaerobic coverage, Clostridium difficile-associated diarrhea and colitis, Helicobacter pylori infection and duodenal ulcer disease, bacterial vaginosis, Giardia lamblia gastro-enteritis, amebiasis caused by Entamoeba histolytica, acne rosacea (topical treatment), and Trichomonas infections.	4173	0.403745	0.174407
DB00981	Physostigmine salicylate	BRD-K25650355	physostigmine	approved;	S01EB05;V03AB19;	This compound belongs to the class of organic compounds known as pyrroloindoles. These are compounds containing a pyrroloindole moiety, which is a tricyclic heterocycle which consists of a pyrrole ring fused to an indole. Pyrrole is 5-membered ring consisting of four carbon atoms and one nitrogen atom. Indole is a bicyclic compound consisting of a six-membered benzene ring fused to a five-membere…	For the treatment of glaucoma, and in the treatment of severe anticholinergic toxicity.	5983	0.403675	0.403675
DB00359	Sulfadiazine sodium	BRD-K32273377	sulfadiazine	approved;vet_approved;	J01EC02;J01EE02;J01EE06;	This compound belongs to the class of organic compounds known as aminobenzenesulfonamides. These are organic compounds containing a benzenesulfonamide moiety with an amine group attached to the benzene ring.	For the treatment of rheumatic fever and meningococcal meningitis	5215	0.403645	0.0184525
DB01067	Glipizide	BRD-K12219985	glipizide	approved;	A10BB07;	An oral hypoglycemic agent which is rapidly absorbed and completely metabolized. [PubChem]	For use as an adjunct to diet for the control of hyperglycemia and its associated symptomatology in patients with non-insulin-dependent diabetes mellitus (NIDDM; type II), formerly known as maturity-onset diabetes, after an adequate trial of dietary therapy has proved unsatisfactory.	3478	0.40303	0.0534075
DB00244	Mesalazine	BRD-K28849549	mesalazine	approved;	A07EC02;	An anti-inflammatory agent, structurally related to the salicylates, which is active in inflammatory bowel disease. It is considered to be the active moiety of sulphasalazine. (From Martindale, The Extra Pharmacopoeia, 30th ed)	For the treatment of active ulcerative proctitis.	4075	0.401115	0.032295
DB00829	Diazepam	BRD-K16508793	diazepam	approved;illicit;vet_approved;	N05BA01;	A benzodiazepine with anticonvulsant, anxiolytic, sedative, muscle relaxant, and amnesic properties and a long duration of action. Its actions are mediated by enhancement of gamma-aminobutyric acid activity. It is used in the treatment of severe anxiety disorders, as a hypnotic in the short-term management of insomnia, as a sedative and premedicant, as an anticonvulsant, and in the management of …	Used in the treatment of severe anxiety disorders, as a hypnotic in the short-term management of insomnia, as a sedative and premedicant, as an anticonvulsant, and in the management of alcohol withdrawal syndrome.	3016	0.40108	0.186473
DB01380	Cortisone acetate	BRD-K86161929	cortisone	approved;		Cortisone acetate is a steroid hormone that has both glucocoriticoid and mineral corticoid activities. Corticosteroids are used to provide relief for inflamed areas of the body. They lessen swelling, redness, itching, and allergic reactions. They are often used as part of the treatment for a number of different diseases, such as severe allergies or skin problems, asthma, or arthritis. Endogenous …	For the relief of the inflammatory and pruritic manifestations of corticosteroid-responsive dermatoses. Also used to treat endocrine (hormonal) disorders (adrenal insufficiency, Addisons disease). It is also used to treat many immune and allergic disorders.	5745	0.40082	0.019775
DB00533	Rofecoxib	BRD-K21733600	rofecoxib	investigational;withdrawn;	M01AH02;	Rofecoxib is used for the treatment of osteoarthritis, rheumatoid arthritis, acute pain in adults, and primary dysmenorrhea, as well as acute treatment of migraine attacks with or without auras. Rofecoxib is a solid. This compound belongs to the stilbenes. These are organic compounds containing a 1,2-diphenylethylene moiety. Stilbenes (C6-C2-C6 ) are derived from the common phenylpropene (C6-C3) …	For the treatment of osteoarthritis, rheumatoid arthritis, acute pain in adults, and primary dysmenorrhea, as well as acute treatment of migraine attacks with or without auras.	5090	0.39957	0.36898
DB00754	Ethotoin	BRD-A30205217	ethotoin	approved;	N03AB01;	Ethotoin is a hydantoin derivative and anticonvulsant. Ethotoin exerts an antiepileptic effect without causing general central nervous system depression. The mechanism of action is probably very similar to that of phenytoin. The latter drug appears to stabilize rather than to raise the normal seizure threshold, and to prevent the spread of seizure activity rather than to abolish the primary focus…	For the control of tonic-clonic (grand mal) and complex partial (psychomotor) seizures.	3292	0.398575	0.369755
DB01128	Bicalutamide	BRD-A29485665	bicalutamide	approved;	L02BB03;	Bicalutamide is an oral non-steroidal anti-androgen for prostate cancer. It binds to the androgen receptor.	For treatment (together with surgery or LHRH analogue) of advanced prostatic cancer.	2375	0.397995	0.369355
DB01247	Isocarboxazid	BRD-K93332168	isocarboxazid	approved;	N06AF01;	An MAO inhibitor that is effective in the treatment of major depression, dysthymic disorder, and atypical depression. It also is useful in the treatment of panic disorder and the phobic disorders. (From AMA, Drug Evaluations Annual, 1994, p311)	May be used to treat major depressive disorder.	3759	0.397375	0.357432
DB00864	Tacrolimus hydrate	BRD-K69608737	tacrolimus	approved;investigational;	D11AH01;L04AD02;	This compound belongs to the class of organic compounds known as macrolide lactams. These are cyclic polyketides containing both a cyclic amide and a cyclic ester group.	For use after allogenic organ transplant to reduce the activity of the patient's immune system and so the risk of organ rejection. It was first approved by the FDA in 1994 for use in liver transplantation, this has been extended to include kidney, heart, small bowel, pancreas, lung, trachea, skin, cornea, and limb transplants. It has also been used in a topical preparation in the treatment of sev…	445643	0.39711	0.39711
DB07692	1-[(2,6-difluorophenyl)sulfonyl]-4-(2,3-dihydro-1,4-benzodioxin-6-ylsulfonyl)piperazine	BRD-K57044355	BRD-K57044355	experimental;		negative regulation of transcription, DNA-templated		25210493	0.39693	0.193052
DB01080	Vigabatrin	BRD-A07893380	vigabatrin	approved;	N03AG04;	An analogue of gamma-aminobutyric acid, vigabatrin is an irreversible inhibitor of 4-aminobutyrate transaminase, the enzyme responsible for the catabolism of gamma-aminobutyric acid. (From Martindale The Extra Pharmacopoeia, 31st ed). Off-label uses include treatment of cocaine dependence.	For use as an adjunct in treatment resistant epilepsy, refractory complex partial seizures, and secondary generalized seizures. It is also used as monotherapy in infantile spasms in West syndrome.	5665	0.396515	0.368752
DB02701	Nicotinamide	BRD-K28912512	nicotinamide	approved;	A11HA01;	An important compound functioning as a component of the coenzyme NAD. Its primary significance is in the prevention and/or cure of blacktongue and pellagra. Most animals cannot manufacture this compound in amounts sufficient to prevent nutritional deficiency and it therefore must be supplemented through dietary intake. [PubChem]		936	0.39637	0.39283
DB00213	Pantoprazole Magnesium	BRD-A22380646	pantoprazole	approved;	A02BC02;A02BD04;A02BD11;	This compound belongs to the class of organic compounds known as sulfinylbenzimidazoles. These are polycyclic aromatic compounds containing a sulfinyl group attached at the position 2 of a benzimidazole moiety.	Short-term (up to 16 weeks) treatment of erosive esophagitis.	4679	0.39629	0.19594
DB00555	Lamotrigine	BRD-K93460210	lamotrigine	approved;investigational;	N03AX09;	Lamotrigine is an anticonvulsant drug used in the treatment of epilepsy and bipolar disorder. For epilepsy it is used to treat partial seizures, primary and secondary tonic-clonic seizures, and seizures associated with Lennox-Gastaut syndrome. Lamotrigine also acts as a mood stabilizer. It is the first medication since lithium granted Food and Drug Administration (FDA) approval for the maintenanc…	For the adjunctive treatment of partial seizures in epilepsy and generalized seizures of Lennox-Gastaut syndrome. Also for the maintenance treatment of bipolar I disorder and depression.	3878	0.39557	0.201352
DB00678	Losartan Potassium	BRD-K76205745	losartan	approved;	C09CA01;C09DA01;C09DB06;	This compound belongs to the class of organic compounds known as biphenyltetrazoles and derivatives. These are organic compounds containing a biphenyl attached to a tetrazole. A carbon atom of the biphenyl moiety is boned to a carbon or the nitrogen atom of the tetrazole moiety.	May be used as a first line agent to treat uncomplicated hypertension, isolated systolic hypertension and left ventricular hypertrophy. May be used as a first line agent to delay progression of diabetic nephropathy. Losartan may be also used as a second line agent in the treatment of congestive heart failure, systolic dysfunction, myocardial infarction and coronary artery disease in those intoler…	3961	0.39524	0.0026
DB07970	5-[(2-methyl-5-{[3-(trifluoromethyl)phenyl]carbamoyl}phenyl)amino]pyridine-3-carboxamide	BRD-K22096725	ALW-II-49-7	experimental;		negative regulation of autophagy		24875320	0.395165	0.0680837
DB00490	Buspirone Hydrochloride	BRD-K93461745	buspirone	approved;investigational;	N05BE01;	This compound belongs to the class of organic compounds known as n-arylpiperazines. These are organic compounds containing a piperazine ring where the nitrogen ring atom carries an aryl group.	For the management of anxiety disorders or the short-term relief of the symptoms of anxiety, and also as an augmention of SSRI-treatment against depression.	2477	0.39488	0.174047
DB00749	Etodolac	BRD-A74667430	etodolac	approved;investigational;vet_approved;	M01AB08;	Etodolac is a non-steroidal anti-inflammatory drug (NSAID) with anti-inflammatory, analgesic and antipyretic properties. Its therapeutic effects are due to its ability to inhibit prostaglandin synthesis. It is indicated for relief of signs and symptoms of rheumatoid arthritis and osteoarthritis.	For acute and long-term management of signs and symptoms of osteoarthritis and rheumatoid arthritis, as well as for the management of pain.	3308	0.394235	0.221585
DB01129	Rabeprazole Sodium	BRD-A39390670	rabeprazole	approved;investigational;	A02BC04;A02BC54;M01AA05;M02AA03;	This compound belongs to the class of organic compounds known as sulfinylbenzimidazoles. These are polycyclic aromatic compounds containing a sulfinyl group attached at the position 2 of a benzimidazole moiety.	For the treatment of acid-reflux disorders (GERD), peptic ulcer disease, H. pylori eradication, and prevention of gastroinetestinal bleeds with NSAID use.	5029	0.39208	0.173508
DB01090	Pentolinium tartrate	BRD-K44942604	pentolinium	approved;		This compound belongs to the class of organic compounds known as n-alkylpyrrolidines. These are compounds containing a pyrrolidine moiety that is substituted at the N1-position with an alkyl group. Pyrrolidine is a five-membered saturated aliphatic heterocycle with one nitrogen atom and four carbon atoms.	Used to produce controlled hypotension during surgical procedures and in hypertensive crises.	5850	0.392035	0.373318
DB06777	Chenodeoxycholic acid	BRD-K18135438	chenodeoxycholic-acid	approved;	A05AA01;	Chenodeoxycholic acid (or Chenodiol) is an epimer of ursodeoxycholic acid (DB01586). Chenodeoxycholic acid is a bile acid naturally found in the body. It works by dissolving the cholesterol that makes gallstones and inhibiting production of cholesterol in the liver and absorption in the intestines, which helps to decrease the formation of gallstones. It can also reduce the amount of other bile ac…	Chenodiol is indicated for patients with radiolucent stones in well-opacifying gallbladders, in whom selective surgery would be undertaken except for the presence of increased surgical risk due to systemic disease or age. Chenodiol will not dissolve calcified (radiopaque) or radiolucent bile pigment stones.	10133	0.391365	0.386015
DB01013	Clobetasol propionate	BRD-K10799896	clobetasol	approved;		A derivative of prednisolone with high glucocorticoid activity and low mineralocorticoid activity. Absorbed through the skin faster than fluocinonide, it is used topically in treatment of psoriasis but may cause marked adrenocortical suppression. [PubChem]	For short-term topical treatment of the inflammatory and pruritic manifestations of moderate to severe corticosteroid-responsive dermatoses of the scalp.	32798	0.39131	0.03953
DB01197	Captopril	BRD-K54529596	captopril	approved;	C09AA01;C09BA01;	Captopril is a potent, competitive inhibitor of angiotensin-converting enzyme (ACE), the enzyme responsible for the conversion of angiotensin I (ATI) to angiotensin II (ATII). ATII regulates blood pressure and is a key component of the renin-angiotensin-aldosterone system (RAAS). Captopril may be used in the treatment of hypertension.	For the treatment of essential or renovascular hypertension (usually administered with other drugs, particularly thiazide diuretics). May be used to treat congestive heart failure in combination with other drugs (e.g. cardiac glycosides, diuretics, &amp;beta;-adrenergic blockers). May improve survival in patients with left ventricular dysfunction following myocardial infarction. May be used to tr…	44093	0.39119	0.15292
DB00968	Methyldopa hydrochloride	BRD-K48578705	methyldopa	approved;		This compound belongs to the class of organic compounds known as catecholamines and derivatives. These are compounds containing 4-(2-Aminoethyl)pyrocatechol [4-(2-aminoethyl)benzene-1,2-diol] or a derivative thereof formed by substitution.	For use in the treatment of hypertension.	38853	0.390375	0.370028
DB01124	Tolbutamide sodium	BRD-K85119730	tolbutamide	approved;	A10BB03;V04CA01;	This compound belongs to the class of organic compounds known as benzenesulfonamides. These are organic compounds containing a sulfonamide group that is S-linked to a benzene ring.	For treatment of NIDDM (non-insulin-dependent diabetes mellitus) in conjunction with diet and exercise.	5505	0.3903	0.00148
DB00346	Alfuzosin Hydrochloride	BRD-A09056319	alfuzosin	approved;investigational;	G04CA01;G04CA51;	This compound belongs to the class of organic compounds known as quinazolinamines. These are heterocyclic aromatic compounds containing a quianazoline moiety substituted by one or more amine groups.	For the reduction of urinary obstruction and relief of associated manifestations (eg. sensation of incomplete bladder emptying or straining, urgency, interrupted or weak stream) in patients with symptomatic beningn prostatic hyperplasia.	2092	0.39028	0.375978
DB00222	Glimepiride	BRD-K34776109	glimepiride	approved;	A10BB12;A10BD04;A10BD06;	Glimepiride is the first III generation sulphonyl urea it is a very potent sulphonyl urea with long duration of action.	For concomitant use with insulin for the treatment of noninsulin-dependent (type 2) diabetes mellitus.	3476	0.39015	0.201662
DB01176	Cyclizine chloride	BRD-K79501723	cyclizine	approved;	R06AE03;R06AE53;	This compound belongs to the class of organic compounds known as diphenylmethanes. These are compounds containing a diphenylmethane moiety, which consists of a methane wherein two hydrogen atoms are replaced by two phenyl groups.	For prevention and treatment of nausea, vomiting, and dizziness associated with motion sickness, and vertigo (dizziness caused by other medical problems).	6726	0.388955	0.137517
DB01325	Quinethazone	BRD-A59303141	quinethazone	approved;	C03BA02;C03BB02;	Quinethazone (INN, brand name Hydromox) is a thiazide diuretic used to treat hypertension. Common side effects include dizziness, dry mouth, nausea, and low potassium levels.	Used to treat hypertension.	6307	0.38883	0.205682
DB00521	Carteolol Hydrochloride	BRD-A42167015	carteolol	approved;	C07AA15;S01ED05;S01ED55;	This compound belongs to the class of organic compounds known as hydroquinolones. These are compounds containing a hydrogenated quinoline bearing a ketone group.	For the treatment of intraocular hypertension and chronic open-angle glaucoma	2583	0.388055	0.0212
DB01235	Levodopa	BRD-K34730807	levodopa	approved;	N04BA01;N04BA02;N04BA03;	The naturally occurring form of dihydroxyphenylalanine and the immediate precursor of dopamine. Unlike dopamine itself, it can be taken orally and crosses the blood-brain barrier. It is rapidly taken up by dopaminergic neurons and converted to dopamine. It is used for the treatment of parkinsonian disorders and is usually given with agents that inhibit its conversion to dopamine outside of the ce…	For the treatment of idiopathic Parkinson's disease (Paralysis Agitans), postencephalitic parkinsonism, symptomatic parkinsonism which may follow injury to the nervous system by carbon monoxide intoxication, and manganese intoxication.	6047	0.387745	0.367557
DB00154	Dihomo-gamma-linolenic acid	BRD-K20152659	gamma-homolinolenic-acid	approved;nutraceutical;		A 20-carbon-chain fatty acid, unsaturated at positions 8, 11, and 14. It differs from arachidonic acid, 5,8,11,14-eicosatetraenoic acid, only at position 5. [PubChem]	For nutritional supplementation, also for treating dietary shortage or imbalance	5280581	0.38723	0.368085
DB01178	Chlormezanone	BRD-A20348246	chlormezanone	approved;withdrawn;	M03BB02;M03BB52;M03BB72;	A non-benzodiazepine that is used in the management of anxiety. It has been suggested for use in the treatment of muscle spasm. [PubChem]	Used in the management of anxiety and in the treatment of muscle spasm.	2717	0.38666	0.185152
DB00605	Sulindac	BRD-A13946108	sulindac	approved;	M01AB02;	Sulindac is a nonsteroidal anti-inflammatory agent (NSAIA) of the arylalkanoic acid class that is marketed in the U.S. by Merck as Clinoril. Like other NSAIAs, it may be used in the treatment of acute or chronic inflammatory conditions. Sulindac is a prodrug, derived from sulfinylindene, that is converted in vivo to an active sulfide compound by liver enzymes. The sulfide metabolite then undergoe…	For acute or long-term use in the relief of signs and symptoms of osteoarthritis, rheumatoid arthritis, ankylosing spondylitis, acute painful shoulder (acute subacromial bursitis/supraspinatus tendinitis), and acute gouty arthritis.	1548887	0.386115	0.03971
DB07096	6-AMINO-BENZO[DE]ISOQUINOLINE-1,3-DIONE	BRD-K50214219	CS-1657	experimental;		negative regulation of fibrinolysis		1720	0.384605	0.0307225
DB04794	Bifonazole	BRD-A94543220	bifonazole	approved;	D01AC10;D01AC60;	Bifonazole is an azole antifungal drug. [Wikipedia]	Used for the treatment of various topical fungal infections, including athlete's foot (tinea pedis).	2378	0.384265	0.20033
DB00426	Famciclovir	BRD-K45033733	famciclovir	approved;	J05AB09;S01AD07;	response to organonitrogen compound	For the treatment of acute herpes zoster (shingles). Also for the treatment or suppression of recurrent genital herpes in immunocompetent patients and treatment of recurrent mucocutaneous herpes simplex infections in HIV infected patients.	3324	0.383945	0.181775
DB00692	Phentolamine Mesylate	BRD-K90333595	phentolamine	approved;	C04AB01;V03AB36;	This compound belongs to the class of organic compounds known as alkyldiarylamines. These are tertiary alkylarylamines having two aryl and one alkyl groups attached to the amino group.	Used as an aid for the diagnosis of pheochromocytoma, and may be administered immediately prior to or during pheochromocytomectomy to prevent or control paroxysmal hypertension resulting from anesthesia, stress, or operative manipulation of the tumor. Phentolamine has also been used to treat hypertensive crisis caused by sympathomimetic amines or catecholamine excess by certain foods or drugs in …	5775	0.383675	0.382885
DB00870	Suprofen	BRD-A34006693	suprofen	approved;withdrawn;	M01AE07;	An ibuprofen-type anti-inflammatory analgesic and antipyretic. It inhibits prostaglandin synthesis and has been proposed as an anti-arthritic. It is no longer approved for use in the United States.	Used as eye drops to inhibit the miosis (pupil constriction) that may occur during ocular surgery.	5359	0.382145	0.0025875
DB00855	Aminolevulinic acid hydrochloride	BRD-K57631554	aminolevulinic-acid	approved;	L01XD04;	This compound belongs to the class of organic compounds known as delta amino acids and derivatives. These are compounds containing a carboxylic acid group and an amino group at the C5 carbon atom.	Aminolevulinic acid plus blue light illumination using a blue light photodynamic therapy illuminator is indicated for the treatment of minimally to moderately thick actinic keratoses of the face or scalp.	137	0.38144	0.130857
DB04820		BRD-K12102668	nialamide	withdrawn;	N06AF02;			4472	0.38074	0.219043
DB05465	MLN-518	BRD-K89162000	tandutinib	investigational;		toll-like receptor 3 signaling pathway	Investigated for use/treatment in leukemia (myeloid).	3038522	0.380465	0.220443
DB00280	Disopyramide phosphate	BRD-A29734509	disopyramide	approved;	C01BA03;	This compound belongs to the class of organic compounds known as pheniramines. These are compounds containing a pheniramine moiety, which is structurally characterized by the presence of a 2-benzylpyridine linked to an dimethyl(propyl)amine to form a dimethyl[3-phenyl-3-(pyridin-2-yl)propyl]amine skeleton.	For the treatment of documented ventricular arrhythmias, such as sustained ventricular tachycardia, ventricular pre-excitation and cardiac dysrhythmias. It is a Class Ia antiarrhythmic drug.	3114	0.380175	0.01176
DB00967	Desloratadine	BRD-K82357231	desloratadine	approved;investigational;	R06AX27;	Desloratadine is a second generation, tricyclic antihistamine that which has a selective and peripheral H1-antagonist action. It is the active descarboethoxy metabolite of loratidine (a second generation histamine). Desloratidine has a long-lasting effect and does not cause drowsiness because it does not readily enter the central nervous system.	For the relief of symptoms of seasonal allergic rhinitis, perennial (non-seasonal) allergic rhinitis. Desloratidine is also used for the sympomatic treatment of pruritus and urticaria (hives) associated with chronic idiopathic urticaria.	124087	0.38007	0.172597
DB02375	Myricetin	BRD-K43149758	myricetin	experimental;		xylan catabolic process		5281672	0.37988	0.101537
DB00356	Chlorzoxazone	BRD-K98174813	chlorzoxazone	approved;	M03BB03;M03BB53;M03BB73;	A centrally acting central muscle relaxant with sedative properties. It is claimed to inhibit muscle spasm by exerting an effect primarily at the level of the spinal cord and subcortical areas of the brain. (From Martindale, The Extra Pharmacopoea, 30th ed, p1202)	For the relief of discomfort associated with acute painful musculoskeletal conditions.	2733	0.377955	0.233987
DB00091	Cyclosporine	BRD-A69815203	cyclosporin-a	approved;investigational;vet_approved;	L04AD01;S01XA18;	A cyclic undecapeptide from an extract of soil fungi. It is a powerful immunosupressant with a specific action on T-lymphocytes. It is used for the prophylaxis of graft rejection in organ and tissue transplantation. Cyclosporine is produced as a metabolite by the fungus species Cordyceps militaris. (From Martindale, The Extra Pharmacopoeia, 30th ed).	For treatment of transplant (kidney, liver, and heart) rejection, rheumatoid arthritis, severe psoriasis.	5280754	0.376965	0.376965
DB00795	Sulfasalazine	BRD-K10670311	sulfasalazine	approved;	A07EC01;	A drug that is used in the management of inflammatory bowel diseases. Its activity is generally considered to lie in its metabolic breakdown product, 5-aminosalicylic acid (see mesalamine) released in the colon. (From Martindale, The Extra Pharmacopoeia, 30th ed, p907)	For the treatment of Crohn's disease and rheumatoid arthritis as a second-line agent.	5359476	0.375815	0.19394
DB00576	Sulfamethizole	BRD-K31682896	sulfamethizole	approved;vet_approved;	B05CA04;D06BA04;J01EB02;S01AB01;	A sulfathiazole antibacterial agent. [PubChem]	For the treatment of urinary tract infection	5328	0.375205	0.159995
DB00338	Omeprazole magnesium	BRD-A55962179	omeprazole	approved;investigational;vet_approved;	A02BC01;A02BD01;A02BD05;	This compound belongs to the class of organic compounds known as sulfinylbenzimidazoles. These are polycyclic aromatic compounds containing a sulfinyl group attached at the position 2 of a benzimidazole moiety.	Omeprazole is indicated for the treatment of duodenal ulcers, benign gastric ulcers, gastroesophageal reflux disease (GERD), heartburn and other symptoms associated with GERD, erosive esophagitis, and long-term treatment of pathological hypersecretory conditions like Zollinger-Ellison syndrome, multiple endocrine adenomas, and systemic mastocytosis.	4594	0.374745	0.170685
DB00774	Hydroflumethiazide	BRD-K36862742	hydroflumethiazide	approved;	C03AA02;C03AB02;C03AH02;	A thiazide diuretic with actions and uses similar to those of hydrochlorothiazide. (From Martindale, The Extra Pharmacopoeia, 30th ed, p822)	Used as adjunctive therapy in edema associated with congestive heart failure, hepatic cirrhosis, and corticosteroid and estrogen therapy. Also used in the management of hypertension either as the sole therapeutic agent or to enhance the effect of other antihypertensive drugs in the more severe forms of hypertension.	3647	0.37459	0.0189375
DB02967	N-Ethylmaleimide	BRD-K98297262	BRD-K98297262	experimental;		A sulfhydryl reagent that is widely used in experimental biochemical studies. [PubChem]		4362	0.374085	0.368975
DB00404	Alprazolam	BRD-K32398298	alprazolam	approved;illicit;investigational;	N05BA12;	A triazolobenzodiazepine compound with antianxiety and sedative-hypnotic actions, that is efficacious in the treatment of panic disorders, with or without agoraphobia, and in generalized anxiety disorders. (From AMA Drug Evaluations Annual, 1994, p238)	For the management of anxiety disorder or the short-term relief of symptoms of anxiety and for the treatment of panic disorder, with or without agoraphobia.	2118	0.37405	0.204695
DB00251	Terconazole	BRD-K86204871	terconazole	approved;	G01AG02;	Terconazole is an anti-fungal medication, primarily used to treat vaginal fungal infections. [Wikipedia]	For the treatment of candidiasis (a yeast-like fungal infection) of the vulva and vagina.	441383	0.373635	0.358775
DB00392	Ethopropazine hydrochloride	BRD-A16311756	profenamine	approved;	N04AA05;	This compound belongs to the class of organic compounds known as phenothiazines. These are polycyclic aromatic compounds containing a phenothiazine moiety, which is a linear tricyclic system that consists of a two benzene rings joined by a para-thiazine ring.	For use in the treatment of Parkinson's disease and also used to control severe reactions to certain medicines such as reserpine.	3290	0.37224	0.0023725
DB01184	Domperidone	BRD-K38305202	domperidone	approved;investigational;vet_approved;	A03FA03;	A specific blocker of dopamine receptors. It speeds gastrointestinal peristalsis, causes prolactin release, and is used as antiemetic and tool in the study of dopaminergic mechanisms. [PubChem]	For management of dyspepsia, heartburn, epigastric pain, nausea, and vomiting.	3151	0.37119	0.37119
DB01138	Sulfinpyrazone	BRD-A36217750	sulfinpyrazone	approved;	M04AB02;	A uricosuric drug that is used to reduce the serum urate levels in gout therapy. It lacks anti-inflammatory, analgesic, and diuretic properties. [PubChem]	For the treatment of gout and gouty arthritis.	5342	0.369045	0.17237
DB00731	SDZ-DJN 608	BRD-K44353683	nateglinide	approved;investigational;	A10BX03;	This compound belongs to the class of organic compounds known as n-acyl-aliphatic-alpha amino acids. These are alpha amino acids carrying a N-acylated aliphatic chain.	For the treatment of non-insulin dependent-diabetes mellitus in conjunction with diet and exercise.	5311309	0.36845	0.00801
DB00800	Fenoldopam mesylate	BRD-A50684349	fenoldopam	approved;	C01CA19;	This compound belongs to the class of organic compounds known as benzazepines. These are organic compounds containing a benzene ring fused to an azepine ring (unsaturated seven-membered heterocycle with one nitrogen atom replacing a carbon atom).	For the in-hospital, short-term (up to 48 hours) management of severe hypertension when rapid, but quickly reversible, emergency reduction of blood pressure is clinically indicated, including malignant hypertension with deteriorating end-organ function.	3341	0.36803	0.206695
DB00414	Acetohexamide	BRD-K52960356	acetohexamide	withdrawn;	A10BB31;	A sulfonylurea hypoglycemic agent that is metabolized in the liver to 1-hydrohexamide. Acetohexamide has been discontinued in the US market.	Used in the management of diabetes mellitus type 2 (adult-onset).	1989	0.36796	0.219413
DB00790	Perindopril arginine	BRD-K92731339	perindopril	approved;	C09AA04;C09BA04;C09BB04;C09BX01;C09BX02;C10BX11;	This compound belongs to the class of organic compounds known as peptides. These are compounds containing an amide derived from two or more amino carboxylic acid molecules (the same or different) by formation of a covalent bond from the carbonyl carbon of one to the nitrogen atom of another.	For the treatment of mild to moderate essential hypertension, mild to moderate congestive heart failure, and to reduce the cardiovascular risk of individuals with hypertension or post-myocardial infarction and stable coronary disease.	107807	0.36772	0.36772
DB00634	Sulfacetamide sodium	BRD-K21520694	sulfacetamide	approved;	D10AF06;S01AB04;	This compound belongs to the class of organic compounds known as aminobenzenesulfonamides. These are organic compounds containing a benzenesulfonamide moiety with an amine group attached to the benzene ring.	For the treatment of bacterial vaginitis, keratitis, acute conjunctivitis, and blepharitis.	5320	0.3676	0.03484
DB00177	Valsartan	BRD-K45158365	valsartan	approved;investigational;	C09CA03;C09DA03;C09DB01;C09DB08;C09DX01;C09DX02;C09DX04;C10BX10;	Valsartan is an angiotensin-receptor blocker (ARB) that may be used to treat a variety of cardiac conditions including hypertension, diabetic nephropathy and heart failure. Valsartan lowers blood pressure by antagonizing the renin-angiotensin-aldosterone system (RAAS); it competes with angiotensin II for binding to the type-1 angiotensin II receptor (AT1) subtype and prevents the blood pressure i…	May be used as a first line agent to treat uncomplicated hypertension, isolated systolic hypertension and left ventricular hypertrophy. May be used as a first line agent to delay progression of diabetic nephropathy. Losartan may be also used as a second line agent in the treatment of congestive heart failure, systolic dysfunction, myocardial infarction and coronary artery disease in those intoler…	60846	0.366625	0.0131475
DB01175	Escitalopram	BRD-K70301876	escitalopram	approved;investigational;	N06AB10;	Escitalopram, the &lt;i&gt;S&lt;/i&gt;-enantiomer of citalopram, belongs to a class of antidepressant agents known as selective serotonin-reuptake inhibitors (SSRIs). Despite distinct structural differences between compounds in this class, SSRIs possess similar pharmacological activity. As with other antidepressant agents, several weeks of therapy may be required before a clinical effect is seen.…	Labeled indications include major depressive disorder (MDD) and generalized anxiety disorder (GAD). Unlabeled indications include treatment of mild dementia-associated agitation in nonpsychotic patients.	146570	0.365425	0.17671
DB02877	TTNPB	BRD-K49685476	TTNPB	experimental;		TTNPB is a retinoic acid analog which acts as a selective RAR agonist.		5289501	0.365245	0.00727
DB01605	Pivmecillinam	BRD-K67100011	pivmecillinam	approved;	J01CA08;	Pivmecillinam is a mecillinam prodrug, a pivaloyloxymethyl ester of amdinocillin that is well absorbed orally, but broken down to amdinocillin in the intestinal mucosa. It is active against gram-negative organisms and used as for amdinocillin. [PubChem]	Used to treat infections due to mecillinam-sensitive organisms such as urinary tract infections, salmonellosis and typhoid fever.	115163	0.365115	0.365115
DB00423	Methocarbamol	BRD-A31521121	methocarbamol	approved;vet_approved;	M03BA03;M03BA53;M03BA73;	A centrally acting muscle relaxant whose mode of action has not been established. It is used as an adjunct in the symptomatic treatment of musculoskeletal conditions associated with painful muscle spasm. (From Martindale, The Extra Pharmacopoeia, 30th ed, p1206)	For use as an adjunct to rest, physical therapy, and other measures for the relief of discomforts associated with acute, painful musculoskeletal conditions.	4107	0.36503	0.0107
DB00503	Ritonavir	BRD-K51485625	ritonavir	approved;investigational;	J05AE03;J05AR10;J05AX66;J05AX67;	An HIV protease inhibitor that works by interfering with the reproductive cycle of HIV. [PubChem]	Indicated in combination with other antiretroviral agents for the treatment of HIV-infection.	392622	0.36454	0.213028
DB01047	Fluocinonide	BRD-K57886322	fluocinonide	approved;investigational;	C05AA11;D07AC08;D07CC05;	A topical glucocorticoid used in the treatment of eczema. [PubChem]	A topical anti-inflammatory product for the relief of the inflammatory and pruritic manifestations of corticosteroid-responsive dermatoses.	9642	0.36446	0.206605
DB00410	Mupirocin calcium	BRD-K15262564	mupirocin	approved;investigational;vet_approved;	D06AX09;R01AX06;	This compound belongs to the class of organic compounds known as medium-chain fatty acids. These are fatty acids with an aliphatic tail that contains between 4 and 12 carbon atoms.	For the treatment of &lt;i&gt;Staphylococci&lt;/i&gt; nasal carriers.	446596	0.36397	0.180165
DB02507	4-Hydroxy-3-[(1s)-3-Oxo-1-Phenylbutyl]-2h-Chromen-2-One	BRD-K25991148	warfarin	experimental;		response to morphine		54688261	0.363475	0.177563
DB00382	Tacrine Hydrochloride	BRD-K81473089	tacrine	withdrawn;	N06DA01;	This compound belongs to the class of organic compounds known as acridines. These are organic compounds containing the acridine moiety, a linear tricyclic heterocycle which consists of two benzene rings joined by a pyridine ring.	For the palliative treatment of mild to moderate dementia of the Alzheimer's type.	1935	0.36217	0.034765
DB01611	Hydroxychloroquine sulfate	BRD-A99117172	hydroxychloroquine	approved;	P01BA02;	This compound belongs to the class of organic compounds known as aminoquinolines and derivatives. These are organic compounds containing an amino group attached to a quinoline ring system.	For the suppressive treatment and treatment of acute attacks of malaria due to &lt;i&gt;Plasmodium vivax&lt;/i&gt;, &lt;i&gt;P. malariae&lt;/i&gt;, &lt;i&gt;P. ovale&lt;/i&gt;, and susceptible strains of &lt;i&gt;P. falciparum&lt;/i&gt;. It is also indicated for the treatment of discoid and systemic lupus erythematosus, and rheumatoid arthritis.	3652	0.362045	0.200692
DB00710	Ibandronate sodium	BRD-K08681769	ibandronic-acid	approved;investigational;	M05BA06;	This compound belongs to the class of organic compounds known as bisphosphonates. These are organic compounds containing two phosphonate groups linked together through a carbon atoms.	For the treatment and prevention of osteoporosis in postmenopausal women.	60852	0.36069	0.34439
DB04743	Nimesulide	BRD-K76775527	nimesulide	approved;withdrawn;	M01AX17;M02AA26;	Nimesulide is a relatively COX-2 selective, non-steroidal anti-inflammatory drug (NSAID) with analgesic and antipyretic properties. Its approved indications are the treatment of acute pain, the symptomatic treatment of osteoarthritis and primary dysmenorrhoea in adolescents and adults above 12 years old. Due to concerns about the risk of hepatotoxicity, nimesulide has been withdrawn from market i…	For the treatment of acute pain, the symptomatic treatment of osteoarthritis and primary dysmenorrhoea in adolescents and adults above 12 years old.	4495	0.358825	0.184468
DB00194	Vidarabine	BRD-K72093121	vidarabine	approved;	J05AB03;S01AD06;	A nucleoside antibiotic isolated from Streptomyces antibioticus. It has some antineoplastic properties and has broad spectrum activity against DNA viruses in cell cultures and significant antiviral activity against infections caused by a variety of viruses such as the herpes viruses, the vaccinia VIRUS and varicella zoster virus. [PubChem]	For treatment of chickenpox - varicella, herpes zoster and herpes simplex	21704	0.358255	0.153973
DB00243	Ranolazine hydrochloride	BRD-A97674275	ranolazine	approved;investigational;	C01EB18;	This compound belongs to the class of organic compounds known as alpha amino acid amides. These are amide derivatives of alpha amino acids.	For the treatment of chronic angina. It should be used in combination with amlodipine, beta-blockers or nitrates.	56959	0.357325	0.255105
DB01600	Tiaprofenic acid	BRD-A72988804	tiaprofenic-acid	approved;	M01AE11;	Tiaprofenic acid is a non-steroidal anti-inflammatory drug of the arylpropionic acid (profen) class, used to treat pain, especially arthritic pain.	Tiaprofenic acid is used to treat pain, especially arthritic pain.	5468	0.35679	0.162257
DB00245	Benzatropine mesylate	BRD-K68804560	benzatropine	approved;	N04AC01;	This compound belongs to the class of organic compounds known as diphenylmethanes. These are compounds containing a diphenylmethane moiety, which consists of a methane wherein two hydrogen atoms are replaced by two phenyl groups.	For use as an adjunct in the therapy of all forms of parkinsonism and also for use in the control of extrapyramidal disorders due to neuroleptic drugs.	1201549	0.354885	0.00137
DB06817	Raltegravir potassium	BRD-K05658747	raltegravir	approved;	J05AR16;J05AX08;	This compound belongs to the class of organic compounds known as pyrimidinecarboxylic acids and derivatives. These are compounds containing a pyrimidine ring which bears a carboxylic acid group (or a derivative thereof).	For the treatment of HIV-1 infection in conjunction with other antiretrovirals.	54671008	0.353405	0.18958
DB00819	Acetazolamide Sodium	BRD-K43457670	acetazolamide	approved;vet_approved;	S01EC01;	This compound belongs to the class of organic compounds known as n-arylamides. These are organic compounds that contain a carboxamide group that is N-linked to a aryl group. They have the generic structure RC(=O)N(R')H, R = organyl group and R'= aryl group.	For adjunctive treatment of: edema due to congestive heart failure; drug-induced edema; centrencephalic epilepsies; chronic simple (open-angle) glaucoma	1986	0.352975	0.211083
DB01163	Amdinocillin	BRD-K41051431	mecillinam	withdrawn;	J01CA11;	Amidinopenicillanic acid derivative with broad spectrum antibacterial action. It is poorly absorbed if given orally and is used in urinary infections and typhus. Amdinocillin is not available in the United States.	Used in the treatment of urinary tract infections caused by some strains of E. coli and klebsiella and enterobacter species. Used mainly against Gram negative organisms.	36273	0.35296	0.333747
DB01137	Levofloxacin hemihydrate	BRD-K09471561	levofloxacin	approved;investigational;	A02BD10;J01MA12;J01RA05;S01AE05;	This compound belongs to the class of organic compounds known as quinoline carboxylic acids. These are quinolines in which the quinoline ring system is substituted by a carboxyl group at one or more positions.	For the treatment of bacterial conjunctivitis caused by susceptible strains of the following organisms: &lt;i&gt;Corynebacterium&lt;/i&gt; species, &lt;i&gt;Staphylococus aureus&lt;/i&gt;, &lt;i&gt;Staphylococcus epidermidis&lt;/i&gt;, &lt;i&gt;Streptococcus pneumoniae&lt;/i&gt;, &lt;i&gt;Streptococcus&lt;/i&gt; (Groups C/F/G), Viridans group streptococci, &lt;i&gt;Acinetobacter lwoffii&lt;/i&gt;…	149096	0.352405	0.188645
DB09026	Aliskiren hemifumarate	BRD-K30020243	aliskiren	approved;investigational;	C09DX02;C09XA02;C09XA52;C09XA53;C09XA54;	This compound belongs to the class of organic compounds known as delta amino acids and derivatives. These are compounds containing a carboxylic acid group and an amino group at the C5 carbon atom.	For the treatment of hypertension, to lower blood pressure.	5493444	0.351825	0.351825
DB02255	GM6001	BRD-K51662849	ilomastat	experimental;		thiamine diphosphate biosynthetic process		132519	0.351375	0.351375
DB01050	Ibuprofen lysine	BRD-A17655518	ibuprofen	approved;	C01EB16;G02CC01;M01AE01;M01AE51;M02AA13;R02AX02;	This compound belongs to the class of organic compounds known as phenylpropanoic acids. These are compounds with a structure containing a benzene ring conjugated to a propanoic acid.		3672	0.35015	0.193873
DB08756	(R)-TRANS-4-(1-AMINOETHYL)-N-(4-PYRIDYL) CYCLOHEXANECARBOXAMIDE	BRD-K44084986	Y-27632	experimental;		adaptive immune response		448042	0.34955	0.1779
DB00543	Amoxapine	BRD-K02265150	amoxapine	approved;	N06AA17;	Amoxapine, the &lt;i&gt;N&lt;/i&gt;-demethylated derivative of the antipsychotic agent loxapine, is a dibenzoxazepine-derivative tricyclic antidepressant (TCA). TCAs are structurally similar to phenothiazines. They contain a tricyclic ring system with an alkyl amine substituent on the central ring. In non-depressed individuals, amoxapine does not affect mood or arousal, but may cause sedation. In…	For the relief of symptoms of depression in patients with neurotic or reactive depressive disorders as well as endogenous and psychotic depressions. May also be used to treat depression accompanied by anxiety or agitation.	2170	0.343915	0.166947
DB00473	Hexylcaine hydrochloride	BRD-A97730597	hexylcaine	approved;withdrawn;		This compound belongs to the class of organic compounds known as benzoic acid esters. These are ester derivatives of benzoic acid.	Used as a local anesthetic for surface application, infiltration or nerve block	10770	0.34371	0.152495
DB00285	Venlafaxine Hydrochloride	BRD-A51714012	venlafaxine	approved;	N06AX16;	This compound belongs to the class of organic compounds known as phenylpropylamines. These are compounds containing a phenylpropylamine moiety, which consists of a phenyl group substituted at the third carbon by an propan-1-amine.	For the management of major depressive disorder (MDD), generalized anxiety disorder (GAD), social anxiety disorder (social phobia), panic disorder with or without agoraphobia, vasomotor symptoms in women with breast cancer and in postmenopausal women, and neuropathic pain.	5656	0.341375	0.32327
DB00588	Fluticasone Propionate	BRD-K62310379	fluticasone	approved;	D07AC17;R01AD08;R01AD58;R03AK06;R03AK11;R03BA05;	Fluticasone propionate, a medium-potency synthetic corticosteroid, is used topically to relieve inflammatory and pruritic symptoms of dermatoses and psoriasis, intranasally to manage symptoms of allergic and non-allergic rhinitis, and orally for the treatment of asthma. Fluticasone proprionate is marketed under several different brand names such as Flonase?. Fluticasone propionate is also availab…	Fluticasone propionate, a medium-potency synthetic corticosteroid, is used topically to relieve inflammatory and pruritic symptoms of dermatoses and psoriasis, intranasally to manage symptoms of allergic and non-allergic rhinitis, and orally for the maintenance treatment of asthma as prophylactic therapy and for patients requiring oral corticosteroid therapy for asthma.	444036	0.340165	0.15387
DB00594	Amiloride hydrochloride	BRD-K97181089	amiloride	approved;	C03DB01;	This compound belongs to the class of organic compounds known as pyrazinecarboxamides. These are compounds containing a pyrazine ring which bears a carboxamide.	For use as adjunctive treatment with thiazide diuretics or other kaliuretic-diuretic agents in congestive heart failure or hypertension.	16231	0.339375	0.330437
DB00501	Cimetidine Hydrochloride	BRD-K34157611	cimetidine	approved;	A02BA01;A02BA51;	This compound belongs to the class of organic compounds known as imidazoles. These are compounds containing an imidazole ring, which is an aromatic five-member ring with two nitrogen atoms at positions 1 and 3, and three carbon atoms.	For the treatment and the management of acid-reflux disorders (GERD), peptic ulcer disease, heartburn, and acid indigestion.	2756	0.339265	0.160057
DB00833	Cefaclor monohydrate	BRD-K20338176	cefaclor	approved;	J01DC04;	This compound belongs to the class of organic compounds known as cephalosporins. These are compounds containing a 1,2-thiazine fused to a 2-azetidinone to for a oxo-5-thia-1-azabicyclo[4.2.0]oct-2-ene-2-carboxylic acid moiety or a derivative thereof.	For the treatment of certain infections caused by bacteria such as pneumonia and ear, lung, skin, throat, and urinary tract infections.	51039	0.337375	0.156443
DB01142	Doxepin Hydrochloride	BRD-K37694030	doxepin	approved;	N06AA12;	This compound belongs to the class of organic compounds known as dibenzoxepines. These are compounds containing a dibenzoxepine moiety, which consists of two benzene connected by an oxazepine ring.	Doxepin is used for the treatment of depression and/or anxiety. It can also be used for chronic urticaria and in the management of pain.	667468	0.33551	0.18311
DB00654	Latanoprost	BRD-K10961822	latanoprost	approved;investigational;	S01EE01;	endoplasmic reticulum organization	For the reduction of elevated intraocular pressure in patients with open-angle glaucoma or ocular hypertension.	5311221	0.333785	0.142605
DB00367	Levonorgestrel	BRD-K35189033	levonorgestrel	approved;investigational;	G03AA07;G03AB03;G03AC03;G03AD01;G03FA11;G03FB09;	A synthetic progestational hormone with actions similar to those of progesterone and about twice as potent as its racemic or (+-)-isomer (norgestrel). It is used for contraception, control of menstrual disorders, and treatment of endometriosis. It is usually supplied in a racemic mixture (Norgestrel, 6533-00-2). Only the levonorgestrel isomer is active. Levonorgestrel is marketed mostly as a comb…	For the treatment of menopausal and postmenopausal disorders and alone or in combination with other hormones as an oral contraceptive.	13109	0.33256	0.125075
DB00674	Galantamine hydrobromide	BRD-K49481516	galantamine	approved;	N06DA04;	This compound belongs to the class of organic compounds known as galanthamine-type amaryllidaceae alkaloids. These are amaryllidaceae alkaloids with a structure characterized a tetracyclic skeleton with two ortho aromatic protons in ring A.	For the treatment of mild to moderate dementia of the Alzheimer's type. Has also been investigated in patients with mild cognitive impairment who did not meet the diagnostic criteria for Alzheimer's disease.	9651	0.329705	0.17934
DB00299	Penciclovir sodium	BRD-K47780086	penciclovir	approved;	D06BB06;J05AB13;	This compound belongs to the class of organic compounds known as hypoxanthines. These are compounds containing the purine derivative 1H-purin-6(9H)-one. Purine is a bicyclic aromatic compound made up of a pyrimidine ring fused to an imidazole ring.	Used to treat recurrent cold sores on the lips and face from various herpesvirus invections.	4725	0.325945	0.13891
DB01628	Etoricoxib	BRD-K54770957	etoricoxib	approved;investigational;	M01AH05;	Etoricoxib is a new COX-2 selective inhibitor. Current therapeutic indications are: treatment of rheumatoid arthritis, osteoarthritis, ankylosing spondylitis, chronic low back pain, acute pain and gout. Like any other COX-2 selective inhibitor, Etoricoxib selectively inhibits isoform 2 of cyclo-oxigenase enzyme (COX-2). This reduces the generation of prostaglandins (PGs) from arachidonic acid.	For the treatment of rheumatoid arthritis, osteoarthritis, ankylosing spondylitis, chronic low back pain, acute pain and gout.	123619	0.32096	0.15141
DB01032	Probenecid	BRD-K95237249	probenecid	approved;	M04AB01;	The prototypical uricosuric agent. It inhibits the renal excretion of organic anions and reduces tubular reabsorption of urate. Probenecid has also been used to treat patients with renal impairment, and, because it reduces the renal tubular excretion of other drugs, has been used as an adjunct to antibacterial therapy. [PubChem]	For the reduction of serum uric acid concentrations in chronic gouty arthritis and tophaceous gout in patients with frequent disabling gout attacks. Has also been effectively used to promote uric acid excretion in hyperuricemia secondary to the administration of thiazide and related diuretics.	4911	0.31841	0.11321
DB08604	Triclosan	BRD-K41731458	triclosan	approved;	D08AE04;D09AA06;	An aromatic ether that is phenol which is substituted at C-5 by a chloro group and at C-2 by a 2,4-dichlorophenoxy group. It is widely used as a preservative and antimicrobial agent in personal care products such as soaps, skin creams, toothpaste and deodorants as well as in household items such as plastic chopping boards, sports equipment and shoes. [ChEBI]	Triclosan is used in a variety of common household products, including soaps, mouthwashes, dish detergents, toothpastes, deodorants, and hand sanitizers. It is also used in health care settings in surgical scrubs and personnel hand washes.	5564	0.317655	0.152097
DB00478	Rimantadine Hydrochloride	BRD-A84282119	rimantadine	approved;	J05AC02;	This compound belongs to the class of organic compounds known as monoalkylamines. These are organic compounds containing an primary aliphatic amine group.	For the prophylaxis and treatment of illness caused by various strains of influenza A virus in adults.	5071	0.31555	0.174585
DB01065	Melatonin	BRD-K97530723	melatonin	approved;nutraceutical;vet_approved;	N05CH01;	Melatonin is a biogenic amine that is found in animals, plants and microbes. Aaron B. Lerner of Yale University is credited for naming the hormone and for defining its chemical structure in 1958. In mammals, melatonin is produced by the pineal gland. The pineal gland is small endocrine gland, about the size of a rice grain and shaped like a pine cone (hence the name), that is located in the cente…	Used orally for jet lag, insomnia, shift-work disorder, circadian rhythm disorders in the blind (evidence for efficacy), and benzodiazepine and nicotine withdrawal. Evidence indicates that melatonin is likely effective for treating circadian rhythm sleep disorders in blind children and adults. It has received FDA orphan drug status as an oral medication for this use. A number of studies have show…	896	0.314265	0.099515
DB00500	Tolmetin sodium	BRD-K82562631	tolmetin	approved;	M01AB03;M02AA21;	This compound belongs to the class of organic compounds known as acetophenones. These are organic compounds containing the acetophenone structure.	For the relief of signs and symptoms of rheumatoid arthritis and osteoarthritis, including the treatment of acute flares long-term management. Also for treatment of juvenile rheumatoid arthritis.	5509	0.31023	0.102447
DB01211	Clarithromycin	BRD-K49668410	clarithromycin	approved;	A02BD04;A02BD05;A02BD06;A02BD07;A02BD09;A02BD11;J01FA09;	Clarithromycin, a semisynthetic macrolide antibiotic derived from erythromycin, inhibits bacterial protein synthesis by binding to the bacterial 50S ribosomal subunit. Binding inhibits peptidyl transferase activity and interferes with amino acid translocation during the translation and protein assembly process. Clarithromycin may be bacteriostatic or bactericidal depending on the organism and dru…	An alternative medication for the treatment of acute otitis media caused by &lt;i&gt;H. influenzae, M. catarrhalis, or S. pneumoniae&lt;/i&gt; in patients with a history of type I penicillin hypersensitivity. Also for the treatment of pharyngitis and tonsillitis caused by susceptible &lt;i&gt;Streptococcus pyogenes&lt;/i&gt;, as well as respiratory tract infections including acute maxillary sinus…	84029	0.30972	0.139432
DB00241	Butalbital	BRD-K71350836	butalbital	approved;illicit;		Butalbital, 5-allyl-5-isobutylbarbituric acid, is a barbiturate with an intermediate duration of action. It has the same chemical formula as talbutal but a different structure. Butalbital is often combined with other medications, such as acetaminophen or aspirin, and is commonly prescribed for the treatment of pain and headache. [Wikipedia]	Used in combination with acetaminophen or aspirin and caffeine for its sedative and relaxant effects in the treatment of tension headaches, migraines, and pain.	2481	0.30657	0.103972
DB01297	Practolol	BRD-A41304429	practolol	approved;	C07AB01;	A beta-adrenergic antagonist that has been used in the emergency treatment of cardiac arrhythmias. [PubChem]	Used in the emergency treatment of cardiac arrhythmias.	4883	0.302885	0.120267
DB00549	Zafirlukast	BRD-K71289571	zafirlukast	approved;investigational;	R03DC01;	nucleic acid phosphodiester bond hydrolysis	For the prophylaxis and chronic treatment of asthma.	5717	0.302	0.149688
DB00975	Dipyridamole	BRD-K86301799	dipyridamole	approved;	B01AC07;	A phosphodiesterase inhibitor that blocks uptake and metabolism of adenosine by erythrocytes and vascular endothelial cells. Dipyridamole also potentiates the antiaggregating action of prostacyclin. (From AMA Drug Evaluations Annual, 1994, p752)	For as an adjunct to coumarin anticoagulants in the prevention of postoperative thromboembolic complications of cardiac valve replacement and also used in prevention of angina.	3108	0.289985	0.136283
DB00496	Darifenacin Hydrobromide	BRD-K95773607	darifenacin	approved;investigational;	G04BD10;	This compound belongs to the class of organic compounds known as diphenylmethanes. These are compounds containing a diphenylmethane moiety, which consists of a methane wherein two hydrogen atoms are replaced by two phenyl groups.	For the treatment of overactive bladder with symptoms of urge urinary incontinence, urgency and frequency.	444031	0.28767	0.10268
DB00207	Azithromycin dihydrate	BRD-K74501079	azithromycin	approved;	J01FA10;J01RA07;S01AA26;	This compound belongs to the class of organic compounds known as macrolides and analogues. These are organic compounds containing a lactone ring of at least twelve members.	For the treatment of patients with mild to moderate infections caused by susceptible strains of the designated microorganisms in the specific conditions: &lt;i&gt;H. influenzae&lt;/i&gt;, &lt;i&gt;M. catarrhalis&lt;/i&gt;, &lt;i&gt;S. pneumoniae&lt;/i&gt;, &lt;i&gt;C. pneumoniae&lt;/i&gt;, &lt;i&gt;M. pneumoniae&lt;/i&gt;, &lt;i&gt;S. pyogenes&lt;/i&gt;, &lt;i&gt;S. aureus&lt;/i&gt;, &lt;i&gt;S. …	447043	0.136995	0.063585
DB01199	Tubocurarine chloride pentahydrate	BRD-K99621550	tubocurarine	approved;	M03AA02;	This compound belongs to the class of organic compounds known as benzylisoquinolines. These are organic compounds containing an isoquinoline to which a benzyl group is attached.	Used as a diagnosis agent for myasthenia gravis, and also to facilitate the intubation after induction of anesthesia in surgical procedure	6000	0.13473	0.13473
DB04599	Aniracetam	BRD-K88611939	aniracetam	experimental;	N06BX11;	NAD biosynthetic process		2196	0.11186	0.04487
DB01261	Sitagliptin	BRD-K19416115	sitagliptin	approved;investigational;	A10BD07;A10BD12;A10BH01;A10BH51;	Sitagliptin is a new oral hypoglycemic (anti-diabetic drug) of the new dipeptidyl peptidase-4 (DPP-4) inhibitor class of drugs. This enzyme-inhibiting drug is to be used either alone or in combination with metformin or a thiazolidinedione for control of type 2 diabetes mellitus. The drug works to competitively inhibit a protein/enzyme, dipeptidyl peptidase 4 (DPP-4), that results in an increased …	For use as an adjunct to diet and exercise to improve glycemic control in patients with type 2 diabetes mellitus. Also for use in patients with type 2 diabetes mellitus to improve glycemic control in combination with metformin or a PPARγ agonist (e.g., thiazolidinediones) when the single agent alone, with diet and exercise, does not provide adequate glycemic control.	4369359	0.086685	0.029655
DB00502	Haloperidol decanoate	BRD-K67783091	haloperidol	approved;	N05AD01;	This compound belongs to the class of organic compounds known as phenylpiperidines. These are compounds containing a phenylpiperidine skeleton, which consists of a piperidine bound to a phenyl group.	For the management of psychotic disorders (eg. schizophrenia) and delirium, as well as to control tics and vocal utterances of Tourette's syndrome (Gilles de la Tourette's syndrome). Also used for the treatment of severe behavioural problems in children with disrubtive behaviour disorder or ADHD (attention-deficit hyperactivity disorder). Haloperidol has been used in the prevention and control of…	3559	0.08318	0.0635975
DB00281	Lidocaine hydrochloride	BRD-K52662033	lidocaine	approved;vet_approved;	C01BB01;C05AD01;D04AB01;N01BB02;N01BB52;R02AD02;S01HA07;S02DA01;	This compound belongs to the class of organic compounds known as alpha amino acid amides. These are amide derivatives of alpha amino acids.	For production of local or regional anesthesia by infiltration techniques such as percutaneous injection and intravenous regional anesthesia by peripheral nerve block techniques such as brachial plexus and intercostal and by central neural techniques such as lumbar and caudal epidural blocks.	3676	0.080645	0.050255
DB00694	Daunorubicin citrate	BRD-K43389675	daunorubicin	approved;	L01DB02;	This compound belongs to the class of organic compounds known as anthracyclines. These are polyketides containing a tetracenequinone?ring structure with a sugar attached by glycosidic linkage.	For remission induction in acute nonlymphocytic leukemia (myelogenous, monocytic, erythroid) of adults and for remission induction in acute lymphocytic leukemia of children and adults.	30323	0.06465	0.06465
DB00482	Celecoxib	BRD-K02637541	celecoxib	approved;investigational;	L01XX33;M01AH01;	Celecoxib is a non-steroidal anti-inflammatory drug (NSAID) used in the treatment of osteoarthritis, rheumatoid arthritis, acute pain, painful menstruation and menstrual symptoms, and to reduce numbers of colon and rectum polyps in patients with familial adenomatous polyposis. It is marketed by Pfizer under the brand name Celebrex. In some countries, it is branded Celebra. Celecoxib is available …	For relief and management of osteoarthritis (OA), rheumatoid arthritis (RA), juvenile rheumatoid arthritis (JRA), ankylosing spondylitis, acute pain, primary dysmenorrhea and oral adjunct to usual care for patients with familial adenomatous polyposis	2662	0.05967	0.052445
DB01097	Leflunomide	BRD-K78692225	leflunomide	approved;investigational;	L04AA13;	Leflunomide is a pyrimidine synthesis inhibitor belonging to the DMARD (disease-modifying antirheumatic drug) class of drugs, which are chemically and pharmacologically very heterogeneous. Leflunomide was approved by FDA and in many other countries (e.g., Canada, Europe) in 1999.	For the management of the signs and symptoms of active rheumatoid arthritis (RA) to improve physical function and to slow the progression of structural damage associated with the disease. Has also been used for the prevention of acute and chronic rejection in recipients of solid organ trasnplants and is designated by the FDA as an orphan drug for this use.	3899	0.059595	0.0298075
DB01009	Ketoprofen	BRD-A97739905	ketoprofen	approved;vet_approved;	M01AE03;M01AE53;M02AA10;	Ketoprofen, a propionic acid derivative, is a nonsteroidal anti-inflammatory agent (NSAIA) with analgesic and antipyretic properties.	For symptomatic treatment of acute and chronic rheumatoid arthritis, osteoarthritis, ankylosing spondylitis, primary dysmenorrhea and mild to moderate pain associated with musculotendinous trauma (sprains and strains), postoperative (including dental surgery) or postpartum pain.	3825	0.059425	0.049875
DB06710	Methyltestosterone	BRD-K84036904	testosterone	approved;	G03BA02;G03EA01;G03EK01;	A synthetic anabolic steroid used for treating men with testosterone deficiency or similar androgen replacement therapies. Also, has antineoplastic properties and so has been used secondarily in women with advanced breast cancer. Methyltestosterone is a schedule III drug in the US.	Methyltestosterone is an anabolic steroid hormone used to treat men with a testosterone deficiency. It is also used in women to treat breast cancer, breast pain, swelling due to pregnancy, and with the addition of estrogen it can treat symptoms of menopause.	6010	0.057415	0.021855
DB01357	Mestranol	BRD-K31920458	mestranol	approved;		The 3-methyl ether of ethinyl estradiol. It must be demethylated to be biologically active. It is used as the estrogen component of many combination ORAL contraceptives. [PubChem]	Mestranol was used as one of the first oral contraceptives.	6291	0.05667	0.042025
DB01006	Letrozole	BRD-K88789588	letrozole	approved;investigational;	L02BG04;	alkaloid metabolic process	For the extended adjuvant treatment of early breast cancer in postmenopausal women who have received 5 years of adjuvant tamoxifen therapy. Also for first-line treatment of postmenopausal women with hormone receptor positive or hormone receptor unknown locally advanced or metastatic breast cancer. Also indicated for the treatment of advanced breast cancer in postmenopausal women with disease prog…	3902	0.056545	0.0097175
DB01205	Flumazenil	BRD-K98769987	flumazenil	approved;	V03AB25;	Fumazenil is an imidazobenzodiazepine derivative and a potent benzodiazepine receptor antagonist that competitively inhibits the activity at the benzodiazepine recognition site on the GABA/benzodiazepine receptor complex, thereby reversing the effects of benzodiazepine on the central nervous system.	For the complete or partial reversal of the sedative effects of benzodiazepines in cases where general anesthesia has been induced and/or maintained with benzodiazepines, and where sedation has been produced with benzodiazepines for diagnostic and therapeutic procedures. Also for the management of benzodiazepine overdose as an adjunct for appropriate supportive and symptomatic measures.	3373	0.054245	0.019975
DB01001	Levalbuterol hydrochloride	BRD-A88254928	salbutamol	approved;vet_approved;	R03AC02;R03AK04;R03AL02;R03CC02;	This compound belongs to the class of organic compounds known as benzyl alcohols. These are organic compounds containing the phenylmethanol substructure.	For symptomatic relief and prevention of bronchospasm due to bronchial asthma, chronic bronchitis, and other chronic bronchopulmonary disorders such as COPD.	2083	0.05409	0.0131675
DB05266	Ibudilast	BRD-K16444452	ibudilast	approved;investigational;	R03DC04;	Ibudilast is an anti-inflammatory and neuroprotective oral agent which shows an excellent safety profile at 60 mg/day and provides significantly prolonged time-to-first relapse and attenuated brain volume shrinkage in patients with relapsing-remitting (RR) and/or secondary progressive (SP) multiple sclerosis (MS). Ibudilast is currently in development in the U.S. (codes: AV-411 or MN-166), but is…	For the treatment of multiple sclerosis, asthma, and cerebrovascular disease.	3671	0.052245	0.04344
DB01171	Moclobemide	BRD-K07237224	moclobemide	approved;	N06AG02;	A reversible monoamine oxidase inhibitor (MAOI) selective for isoform A (RIMA) used to treat major depressive disorder.	For the treatment of depression.	4235	0.04832	0.0385
DB00208	Ticlopidine Hydrochloride	BRD-K00603606	ticlopidine	approved;	B01AC05;	This compound belongs to the class of organic compounds known as thienopyridines. These are heterocyclic compounds containing a thiophene ring fused to a pyridine ring. Thiophene is 5-membered ring consisting of four carbon atoms and one sulfur atom. Pyridine is a 6-membered ring consisting of five carbon atoms and one nitrogen center.		5472	0.029375	0.0050275
DB00977	Ethinyl Estradiol	BRD-K48195008	ethinylestradiol	approved;	G03AA01;G03AA02;G03AA03;G03AA04;G03AA05;G03AA06;G03AA07;G03AA08;G03AA09;G03AA10;G03AA11;G03AA12;G03AA13;G03AA15;G03AA16;G03AB01;G03AB02;G03AB03;G03AB04;G03AB05;G03AB06;G03AB07;G03CA01;L02AA03;	A semisynthetic alkylated estradiol with a 17-alpha-ethinyl substitution. It has high estrogenic potency when administered orally and is often used as the estrogenic component in oral contraceptives [PubChem]. Ethinyl estradiol is marketed mostly as a combination oral contraceptive under several brand names such as Alesse, Tri-Cyclen, Triphasil, and Yasmin. The FDA label includes a black box warn…	For treatment of moderate to severe vasomotor symptoms associated with the menopause, female hypogonadism, prostatic carcinoma-palliative therapy of advanced disease, breast cancer, as an oral contraceptive, and as emergency contraceptive.	5991	0.029355	0.0115925
DB00763	Methimazole	BRD-K54416256	methimazole	approved;	H03BB02;H03BB52;	A thioureylene antithyroid agent that inhibits the formation of thyroid hormones by interfering with the incorporation of iodine into tyrosyl residues of thyroglobulin. This is done by interfering with the oxidation of iodide ion and iodotyrosyl groups through inhibition of the peroxidase enzyme. [PubChem]	For the treatment of hyperthyroidism, goiter, Graves disease and psoriasis.	1349907	0.00755	0.0007325

## Sheet: 96h_approved drugs
This table shows ES of approved compounds compared with eIF4G1-silenced cells at 96 h after irradiation. The threshold of maximum ES is 0.66 and the threshold of average ES is 0.48.
Drugbank_id	Drug_name	Pert_id	Pert_name	Drug_group	ATC_code	Drug_description	Drug_indication	Pubchem_id	ES_maximum	ES_average
DB02546	Vorinostat	BRD-K81418486	vorinostat	approved;investigational;	L01XX38;	Vorinostat (rINN) or suberoylanilide hydroxamic acid (SAHA), is a drug currently under investigation for the treatment of cutaneous T cell lymphoma (CTCL), a type of skin cancer, to be used when the disease persists, gets worse, or comes back during or after treatment with other medicines. It is the first in a new class of agents known as histone deacetylase inhibitors. A recent study suggested t…	For the treatment of cutaneous manifestations in patients with cutaneous T-cell lymphoma who have progressive, persistent or recurrent disease on or following two systemic therapies.	5311	0.71665	0.0480558
DB00544	Fluorouracil	BRD-K24844714	fluorouracil	approved;	L01BC02;L01BC52;	A pyrimidine analog that is an antineoplastic antimetabolite. It interferes with DNA synthesis by blocking the thymidylate synthetase conversion of deoxyuridylic acid to thymidylic acid. [PubChem]	For the topical treatment of multiple actinic or solar keratoses. In the 5% strength it is also useful in the treatment of superficial basal cell carcinomas when conventional methods are impractical, such as with multiple lesions or difficult treatment sites. Fluorouracil injection is indicated in the palliative management of some types of cancer, including colon, esophageal, gastric, rectum, bre…	3385	0.69672	0.134976
DB00322	Floxuridine	BRD-K47832606	floxuridine	approved;		An antineoplastic antimetabolite that is metabolized to fluorouracil when administered by rapid injection. Floxuridine is available as a sterile, nonpyrogenic, lyophilized powder for reconstitution. When administered by slow, continuous, intra-arterial infusion, it is converted to floxuridine monophosphate. It has been used to treat hepatic metastases of gastrointestinal adenocarcinomas and for p…	For palliative management of gastrointestinal adenocarcinoma metastatic to the liver, when given by continuous regional intra-arterial infusion in carefully selected patients who are considered incurable by surgery or other means. Also for the palliative management of liver cancer (usually administered by hepatic intra-arterial infusion).	5790	0.687985	0.578357
DB09073	Palbociclib Isethionate	BRD-K51313569	palbociclib	approved;	L01XE33;	This compound belongs to the class of organic compounds known as pyridinylpiperazines. These are compounds containing a pyridinylpiperazine skeleton, which consists of a pyridine linked (not fused) to a piperazine by a bond by a single bond that is not part of a ring.	Palbociclib is indicated in combination with letrozole for the treatment of postmenopausal women with estrogen receptor (ER)-positive, human epidermal growth factor receptor 2 (HER2)-negative advanced breast cancer as initial endocrine-based therapy for their metastatic disease. This indication is approved under accelerated approval based on progression-free survival (PFS). Continued approval for…	5330286	0.68268	0.56126
DB00293	Raltitrexed	BRD-K89839824	raltitrexed	approved;investigational;	L01BA03;	Raltitrexed (brand name Tomudex&amp;reg;) is a chemotherapy drug manufactured AstraZeneca Company, is an antimetabolite used in chemotherapy. It is an inhibitor of thymidylate synthase.	For the treatment of malignant neoplasm of colon and rectum	104758	0.66992	0.600958
DB06616	Bosutinib	BRD-K99964838	bosutinib	approved;	L01XE14;	Bosutinib is a Bcr-Abl kinase inhibitor for the treatment of Philadelphia chromosome-positive (Ph+) chronic myelogenous leukemia (CML). Compared to other tyrosine kinase inhibitors, it has a more favourable hematologic toxicity profile. FDA approved on September 4, 2012.	Treatment of chronic, accelerated, or blast phase Philadelphia chromosome-positive (Ph+) chronic myelogenous leukemia (CML) with resistance or intolerance to prior therapy in adult patients.	5328940	0.661575	0.512408
DB00675	Tamoxifen Citrate	BRD-K93754473	tamoxifen	approved;	L02BA01;	This compound belongs to the class of organic compounds known as stilbenes. These are organic compounds containing a 1,2-diphenylethylene moiety. Stilbenes (C6-C2-C6 ) are derived from the common phenylpropene (C6-C3) skeleton building block. The introduction of one or more hydroxyl groups to a phenyl ring lead to stilbenoids.	Tamoxifen is indicated for the treatment of metastatic breast cancer in women and men and ductal carcinoma in Situ.	2733526	0.65312	0.4803
DB00934	Maprotiline Hydrochloride	BRD-K25433859	maprotiline	approved;	N06AA21;	This compound belongs to the class of organic compounds known as anthracenes. These are organic compounds containing a system of three linearly fused benzene rings.	For treatment of depression, including the depressed phase of bipolar depression, psychotic depression, and involutional melancholia, and may also be helpful in treating certain patients suffering severe depressive neurosis.	4011	0.646325	0.30969
DB01254	Dasatinib monohydrate	BRD-K49328571	dasatinib	approved;investigational;	L01XE06;	This compound belongs to the class of organic compounds known as n-arylpiperazines. These are organic compounds containing a piperazine ring where the nitrogen ring atom carries an aryl group.	For the treatment of adults with chronic, accelerated, or myeloid or lymphoid blast phase chronic myeloid leukemia with resistance or intolerance to prior therapy. Also indicated for the treatment of adults with Philadelphia chromosome-positive acute lymphoblastic leukemia with resistance or intolerance to prior therapy.	3062316	0.64253	0.530611
DB00903	Ethacrynate sodium	BRD-K63630713	etacrynic-acid	approved;	C03CC01;	This compound belongs to the class of organic compounds known as phenoxyacetic acid derivatives. These are compounds containing an anisole where the methane group is linked to an acetic acid or a derivative.	For the treatment of high blood pressure and edema caused by diseases like congestive heart failure, liver failure, and kidney failure.	3278	0.63636	0.317107
DB08911	Trametinib	BRD-K12343256	trametinib	approved;	L01XE25;	Trametinib dimethyl sulfoxide is a kinase inhibitor. Each 1-mg tablet contains 1.127 mg trametinib dimethyl sulfoxide equivalent to 1 mg of trametinib non-solvated parent. FDA approved on May 29, 2013.	Trametinib is indicated for the treatment of unresectable or metastatic melanoma with BRAF V600E or V600K mutations, as detected by an FDA-approved test.	11707110	0.63271	0.181055
DB00993	Azathioprine Sodium	BRD-K32821942	azathioprine	approved;	L04AX01;	This compound belongs to the class of organic compounds known as diarylthioethers. These are organosulfur compounds containing a thioether group that is substituted by two aryl groups.	For use in rheumatoid arthritis, preventing renal transplant rejection, Crohn's disease, and colitis.	2265	0.63268	0.27982
DB01100	Pimozide	BRD-K01292756	pimozide	approved;	N05AG02;	A diphenylbutylpiperidine that is effective as an antipsychotic agent and as an alternative to haloperidol for the suppression of vocal and motor tics in patients with Tourette syndrome. Although the precise mechanism of action is unknown, blockade of postsynaptic dopamine receptors has been postulated. (From AMA Drug Evaluations Annual, 1994, p403)	Used for the suppression of motor and phonic tics in patients with Tourette's Disorder who have failed to respond satisfactorily to standard treatment.	16362	0.62877	0.152987
DB08881	Vemurafenib	BRD-K56343971	vemurafenib	approved;	L01XE15;	Vemurafenib is a BRAF enzyme inhibitor developed by Plexxikon and Genentech for the treatment of late-stage melanoma. [Wikipedia] The cobas? 4800 BRAF B600 mutation test provided by Roche Molecular Systems is the diagnostic test to confirm eligibility for treatment. FDA approved on August 17, 2011 under the company Hoffmann La Roche.	Treatment of unresectable or metastatic melanoma in patients with the BRAF-V600 mutation.	42611257	0.62201	0.144079
DB00380	Dexrazoxane hydrochloride	BRD-K07265709	razoxane	approved;withdrawn;	V03AF02;	This compound belongs to the class of organic compounds known as alpha amino acids and derivatives. These are amino acids in which the amino group is attached to the carbon atom immediately adjacent to the carboxylate group (alpha carbon), or a derivative thereof.	For reducing the incidence and severity of cardiomyopathy associated with doxorubicin administration in women with metastatic breast cancer who have received a cumulative doxorubicin hydrochloride dose of 300 mg/m^2 and would benefit from continued doxorubicin therapy. Also approved for the treatment of extravasation from intravenous anthracyclines.	71384	0.61069	0.25228
DB06144	Sertindole	BRD-K69116396	sertindole	approved;withdrawn;	N05AE03;	Sertindole, a neuroleptic, is one of the newer antipsychotic medications available. Serdolect is developed by the Danish pharmaceutical company H. Lundbeck. Like the other atypical antipsychotics, it has activity at dopamine and serotonin receptors in the brain. It is used in the treatment of schizophrenia. It is classified chemically as a phenylindole derivative. It was first marketed in 1996 in…	Used in the treatment of schizophrenia.	60149	0.60088	0.28099
DB00637	Astemizole	BRD-K37249724	astemizole	approved;withdrawn;	R06AX11;	Astemizole is a long-acting, non-sedating second generation antihistamine used in the treatment of allergy symptoms. It was withdrawn from market by the manufacturer in 1999 due to the potential to cause arrhythmias at high doses, especially when when taken with CYP inhibitors or grapefruit juice.	Astemizole was indicated for use in the relieving allergy symptoms, particularly rhinitis and conjunctivitis. It has been withdrawn from the market however due to concerns of arrhythmias.	2247	0.580925	0.12052
DB00146	Calcidiol	BRD-K77175907	calcifediol	approved;nutraceutical;	A11CC06;	The major circulating metabolite of vitamin D3 (cholecalciferol). It is produced in the liver and is the best indicator of the body's vitamin D stores. It is effective in the treatment of rickets and osteomalacia, both in azotemic and non-azotemic patients. Calcifediol also has mineralizing properties. [PubChem]	Used to treat vitamin D deficiency or insufficiency, refractory rickets (vitamin D resistant rickets), familial hypophosphatemia and hypoparathyroidism, and in the management of hypocalcemia and renal osteodystrophy in patients with chronic renal failure undergoing dialysis. Also used in conjunction with calcium in the management and prevention of primary or corticosteroid-induced osteoporosis.	5283731	0.580125	0.287325
DB01195	Flecainide acetate	BRD-A09472452	flecainide	approved;withdrawn;	C01BC04;	This compound belongs to the class of organic compounds known as salicylamides. These are carboxamide derivatives of salicylic acid. Salicylic acid is the ortho-hydroxylated derivative of benzoic acid.	Flecainide is is a class Ic antiarrhythmic agent and as such, it is used for the prevention of paroxysmal supraventricular tachycardias (PSVT), including atrioventricular nodal reentrant tachycardia, atrioventricular reentrant tachycardia and other supraventricular tachycardias of unspecified mechanism associated with disablin.	3356	0.572275	0.114312
DB00850	Perphenazine enanthate	BRD-K10995081	perphenazine	approved;	N05AB03;	This compound belongs to the class of organic compounds known as phenothiazines. These are polycyclic aromatic compounds containing a phenothiazine moiety, which is a linear tricyclic system that consists of a two benzene rings joined by a para-thiazine ring.	For use in the management of the manifestations of psychotic disorders and for the control of severe nausea and vomiting in adults.	4748	0.56207	0.448665
DB04842	Fluspirilene	BRD-K77947974	fluspirilene	approved;	N05AG01;	A long-acting injectable antipsychotic agent used for chronic schizophrenia.	Used for the treatment of schizophrenia.	3396	0.559225	0.221881
DB01083	Orlistat	BRD-K63343048	orlistat	approved;investigational;	A08AB01;	Orlistat is a drug designed to treat obesity. Its primary function is preventing the absorption of fats from the human diet, thereby reducing caloric intake. Orlistat works by inhibiting pancreatic lipase, an enzyme that breaks down triglycerides in the intestine. Without this enzyme, triglycerides from the diet are prevented from being hydrolyzed into absorbable free fatty acids and are excreted…	For obesity management including weight loss and weight maintenance when used in conjunction with a reduced-calorie diet. Also used to reduce the risk for weight regain after prior weight loss. Use of orlistat is pending revision due to reports of liver-related adverse events.	3034010	0.55587	0.2609
DB00257	Clotrimazole	BRD-K15916496	clotrimazole	approved;vet_approved;	A01AB18;D01AC01;G01AF02;	An imidazole derivative with a broad spectrum of antimycotic activity. It inhibits biosynthesis of the sterol ergostol, an important component of fungal cell membranes. Its action leads to increased membrane permeability and apparent disruption of enzyme systems bound to the membrane. [PubChem]	For the local treatment of oropharyngeal candidiasis and vaginal yeast infections, also used in fungal infections of the skin such as ringworm, athlete's foot, and jock itch.	2812	0.55472	0.085175
DB00227	Lovastatin	BRD-K09416995	lovastatin	approved;investigational;	C10AA02;C10BA01;	Lovastatin is a cholesterol-lowering agent that belongs to the class of medications called statins. It was the second agent of this class discovered. It was discovered by Alfred Alberts and his team at Merck in 1978 after screening only 18 compounds over 2 weeks. The agent, also known as mevinolin, was isolated from the fungi &lt;i&gt;Aspergillus terreus&lt;/i&gt;. Research on this compound was s…	For management as an adjunct to diet to reduce elevated total-C, LDL-C, apo B, and TG levels in patients with primary hypercholesterolemia and mixed dyslipidemia. For primary prevention of coronary heart disease and to slow progression of coronary atherosclerosis in patients with coronary heart disease.	53232	0.553535	0.458685
DB00412	Rosiglitazone Maleate	BRD-A97437073	rosiglitazone	approved;investigational;	A10BD03;A10BD04;A10BG02;	This compound belongs to the class of organic compounds known as phenol ethers. These are aromatic compounds containing an ether group substituted with a benzene ring.	Rosiglitazone is indicated as an adjunct to diet and exercise to improve glycemic control in adults with type 2 diabetes mellitus.	77999	0.548895	0.0289338
DB00673	Aprepitant	BRD-K52827117	aprepitant	approved;investigational;	A04AD12;	Aprepitant, an antiemetic, is a substance P/neurokinin 1 (NK1) receptor antagonist which, in combination with other antiemetic agents, is indicated for the prevention of acute and delayed nausea and vomiting associated with initial and repeat courses of highly emetogenic cancer chemotherapy. Aprepitant is a selective high-affinity antagonist of human substance P/neurokinin 1 (NK1) receptors. Apre…	For the prevention of nausea and vomiting associated with highly emetogenic cancer chemotherapy, including high-dose cisplatin (in combination with other antiemetic agents).	6918365	0.54652	0.470807
DB00203	Sildenafil Citrate	BRD-K50128260/BRD-K79759585	sildenafil	approved;investigational;	G04BE03;	This compound belongs to the class of organic compounds known as benzenesulfonamides. These are organic compounds containing a sulfonamide group that is S-linked to a benzene ring.	For the treatment of erectile dysfunction and to relieve symptoms of pulmonary arterial hypertension (PAH).	5212	0.542365	0.160869
DB00518	Albendazole	BRD-K79131256	albendazole	approved;vet_approved;	P02CA03;	A benzimidazole broad-spectrum anthelmintic structurally related to mebendazole that is effective against many diseases. (From Martindale, The Extra Pharmacopoeia, 30th ed, p38)	For the treatment of parenchymal neurocysticercosis due to active lesions caused by larval forms of the pork tapeworm, &lt;i&gt;Taenia solium&lt;/i&gt; and for the treatment of cystic hydatid disease of the liver, lung, and peritoneum, caused by the larval form of the dog tapeworm, &lt;i&gt;Echinococcus granulosus&lt;/i&gt;.	2082	0.537565	0.038125
DB00249	Idoxuridine	BRD-K76634210	idoxuridine	approved;	D06BB01;J05AB02;S01AD01;	An analog of deoxyuridine that inhibits viral DNA synthesis. The drug is used as an antiviral agent. [PubChem]	For use in keratoconjunctivitis and keratitis caused by herpes simplex virus.	5905	0.535585	0.285482
DB09101	Elvitegravir	BRD-K54472332	elvitegravir	approved;	J05AR09;J05AR18;J05AX11;	The metabolism of Theophylline can be increased when combined with Thyroid extract.	Elvitegravir in combination with an HIV protease inhibitor coadministered with ritonavir and with other antiretroviral drug(s) is indicated for the treatment of HIV-1 infection in antiretroviral treatment-experienced adults.	5277135	0.535165	0.466517
DB04942	Tamibarotene	BRD-K36627727	tamibarotene	approved;investigational;		Tamibarotene is a novel synthetic retinoid for acute promyelocytic leukaemia (APL). Tamibarotene is currently approved in Japan for treatment of recurrent APL, and is undergoing clinical trials in the United States.	Investigated for use/treatment in leukemia (unspecified).	108143	0.53498	0.527655
DB00987	Cytarabine	BRD-K33106058	cytarabine	approved;investigational;	L01BC01;	A pyrimidine nucleoside analog that is used mainly in the treatment of leukemia, especially acute non-lymphoblastic leukemia. Cytarabine is an antimetabolite antineoplastic agent that inhibits the synthesis of DNA. Its actions are specific for the S phase of the cell cycle. It also has antiviral and immunosuppressant properties. (From Martindale, The Extra Pharmacopoeia, 30th ed, p472)	For the treatment of acute non-lymphocytic leukemia, acute lymphocytic leukemia and blast phase of chronic myelocytic leukemia.	6253	0.53452	0.296312
DB00317	Gefitinib	BRD-K64052750	gefitinib	approved;investigational;	L01XE02;	Gefitinib (originally coded ZD1839) is a drug used in the treatment of certain types of cancer. Acting in a similar manner to erlotinib (marketed as Tarceva), gefitinib selectively targets the mutant proteins in malignant cells. It is marketed by AstraZeneca under the trade name Iressa. [Wikipedia]	For the continued treatment of patients with locally advanced or metastatic non-small cell lung cancer after failure of either platinum-based or docetaxel chemotherapies.	123631	0.53375	0.0999046
DB09079	Nintedanib Esylate	BRD-K49075727	nintedanib	approved;	L01XE31;	This compound belongs to the class of organic compounds known as indolecarboxylic acids. These are compounds containing a carboxylic acid group linked to an indole.	Nintedanib is indicated for the treatment of idiopathic pulmonary fibrosis (IPF).	9809715	0.532205	0.310532
DB00401	Nisoldipine	BRD-A96107863/BRD-A84465106	nisoldipine	approved;	C08CA07;	Nisoldipine is a 1,4-dihydropyridine calcium channel blocker. It acts primarily on vascular smooth muscle cells by stabilizing voltage-gated L-type calcium channels in their inactive conformation. By inhibiting the influx of calcium in smooth muscle cells, nisoldipine prevents calcium-dependent smooth muscle contraction and subsequent vasoconstriction. Nisoldipine may be used in alone or in combi…	For the treatment of hypertension. It may be used alone or in combination with other antihypertensive agents.	4499	0.53119	0.164027
DB00499	Flutamide	BRD-K28307902	flutamide	approved;	L02BB01;	An antiandrogen with about the same potency as cyproterone in rodent and canine species.	For the management of locally confined Stage B2-C and Stage D2 metastatic carcinoma of the prostate	3397	0.52639	0.0360217
DB08901	Ponatinib Hydrochloride	BRD-K44227013	ponatinib	approved;	L01XE24;	This compound belongs to the class of organic compounds known as n-phenylbenzamides. These are benzamides that are N-linked to a phenyl group via the carboxamide group.	Ponatinib is indicated for the treatment of adult patients with chronic phase, accelerated phase, or blast phase chronic myeloid leukemia (CML) that is resistant or intolerant to prior tyrosine kinase inhibitor therapy or Philadelphia chromosome positive acute lymphoblastic leukemia (Ph+ALL) that is resistant or intolerant to prior tyrosine kinase inhibitor therapy.	24826799	0.522965	0.0767981
DB00641	Simvastatin	BRD-K22134346	simvastatin	approved;	A10BH51;C10AA01;C10BA02;C10BA04;C10BX01;C10BX04;	Simvastatin is a lipid-lowering agent that is derived synthetically from the fermentation of Aspergillus terreus. It is a potent competitive inhibitor of 3-hydroxy-3-methylglutaryl coenzyme A reductase (hydroxymethylglutaryl COA reductases), which is the rate-limiting enzyme in cholesterol biosynthesis. It may also interfere with steroid hormone production. Due to the induction of hepatic LDL rec…	For the treatment of hypercholesterolemia and for the reduction in the risk of cardiac heart disease mortality and cardiovascular events. It can also be used in adolescent patients for the treatment of heterozygous familial hypercholesterolemia.	54454	0.52266	0.426627
DB00523	Alitretinoin	BRD-K35483542	alitretinoin	approved;investigational;	D11AH04;L01XX22;	An important regulator of gene expression during growth and development, and in neoplasms. Tretinoin, also known as retinoic acid and derived from maternal vitamin A, is essential for normal growth; and embryonic development. An excess of tretinoin can be teratogenic. It is used in the treatment of psoriasis; acne vulgaris; and several other skin diseases. It has also been approved for use in pro…	For topical treatment of cutaneous lesions in patients with AIDS-related Kaposi's sarcoma.	449171	0.522525	0.46908
DB04868	Nilotinib hydrochloride monohydrate	BRD-K81528515	nilotinib	approved;investigational;	L01XE08;	This compound belongs to the class of organic compounds known as n-phenylbenzamides. These are benzamides that are N-linked to a phenyl group via the carboxamide group.	For the potential treatment of various leukemias, including chronic myeloid leukemia (CML).	644241	0.521655	0.173251
DB00982	Isotretinoin	BRD-K76723084	isotretinoin	approved;	D10AD04;D10AD54;D10BA01;	Isotretinoin is a medication used for the treatment of severe acne. It is sometimes used in prevention of certain skin cancers. It is a retinoid, meaning it derives from vitamin A and is found in small quantities naturally in the body. Isotretinoin binds to and activates nuclear retinoic acid receptors (RAR), thereby regulating cell proliferation and differentiation. This agent also exhibits immu…	For the treatment of severe recalcitrant nodular acne	5282379	0.52089	0.492555
DB00253	Medrysone	BRD-K56515112	medrysone	approved;	S01BA08;	Medrysone is a corticosteroid used in ophthalmology. [Wikipedia]	For the treatment of allergic conjunctivitis, vernal conjunctivitis, episcleritis, and epinephrine sensitivity.	247839	0.52053	0.269238
DB00507	Nitazoxanide	BRD-K96471533	nitazoxanide	approved;investigational;vet_approved;	P01AX11;	Nitazoxanide, also known by the brand name Alinia, is a synthetic nitrothiazolyl-salicylamide derivative and an anti-protozoal agent. It is approved for treatment of infectious diarrhea caused by Cryptosporidium parvum and Giardia lamblia in patients 1 year of age and older. Following oral administration it is rapidly hydrolyzed to its active metabolite, tizoxanide, which is 99% protein bound. Pe…	For the treatment of diarrhea in adults and children caused by the protozoa &lt;i&gt;Giardia lamblia&lt;/i&gt; and for the treatment of diarrhea in children caused by the protozoa &lt;i&gt;Cryptosporidium parvum&lt;/i&gt;.	41684	0.513495	0.0498975
DB00162	Vitamin A acetate	BRD-K64634304/BRD-K22429181	tretinoin/retinol	approved;nutraceutical;vet_approved;	A11CA01;D10AD02;R01AX02;S01XA02;	This compound belongs to the class of organic compounds known as retinoids. These are oxygenated derivatives of 3,7-dimethyl-1-(2,6,6-trimethylcyclohex-1-enyl)nona-1,3,5,7-tetraene and derivatives thereof.	For the treatment of vitamin A deficiency.	445354	0.51345	0.242911
DB00622	Nicardipine Hydrochloride	BRD-A26711594	nicardipine	approved;	C08CA04;	This compound belongs to the class of organic compounds known as dihydropyridinecarboxylic acids and derivatives. These are compounds containing a dihydropyridine moiety bearing a carboxylic acid group.	Used for the management of patients with chronic stable angina and for the treatment of hypertension.	4474	0.512255	0.424198
DB00472	Fluoxetine Hydrochloride	BRD-A31159102	fluoxetine	approved;vet_approved;	N06AB03;N06CA03;	This compound belongs to the class of organic compounds known as phenylpropylamines. These are compounds containing a phenylpropylamine moiety, which consists of a phenyl group substituted at the third carbon by an propan-1-amine.	Labeled indication include: major depressive disorder (MDD), moderate to severe bulimia nervosa, obsessive-compulsive disorder (OCD), premenstrual dysphoric disorder (PMDD), panic disorder with or without agoraphobia, and combination treatment with olanzapine for treatment-resistant or bipolar I depression. Unlabeled indications include: selective mutism, mild dementia-associated agitation in non…	3386	0.508265	0.474635
DB00188	Bortezomib	BRD-K88510285	bortezomib	approved;investigational;	L01XX32;	Bortezomib (originally PS-341 and marketed as Velcade by Millennium Pharmaceuticals) is the first therapeutic proteasome inhibitor to be tested in humans. It is approved in the U.S. for treating relapsed multiple myeloma and mantle cell lymphoma. In multiple myeloma, complete clinical responses have been obtained in patients with otherwise refractory or rapidly advancing disease.	For treatment of multiple myeloma in patients who have not been successfully treated with at least two previous therapies.	387447	0.499635	0.36808
DB01007	Tioconazole	BRD-A33084557	tioconazole	approved;	D01AC07;G01AF08;	Tioconazole is an antifungal medication of the Imidazole class used to treat infections caused by a fungus or yeast. Tioconazole topical (skin) preparations are also available for ringworm, jock itch, athlete's foot, and tinea versicolor or sun fungus. Tioconazole interacts with 14-alpha demethylase, a cytochrome P-450 enzyme that converts lanosterol to ergosterol, an essential component of the y…	For the local treatment of vulvovaginal candidiasis (moniliasis).	5482	0.49843	0.444707
DB00861	Diflunisal	BRD-K22031190	diflunisal	approved;	N02BA11;	Diflunisal, a salicylate derivative, is a nonsteroidal anti-inflammatory agent (NSAIA) with pharmacologic actions similar to other prototypical NSAIAs. Diflunisal possesses anti-inflammatory, analgesic and antipyretic activity. Though its mechanism of action has not been clearly established, most of its actions appear to be associated with inhibition of prostaglandin synthesis via the arachidonic…	For symptomatic treatment of mild to moderate pain accompanied by inflammation (e.g. musculoskeletal trauma, post-dental extraction, post-episiotomy), osteoarthritis, and rheumatoid arthritis.	3059	0.497995	0.401505
DB00421	Spironolactone	BRD-K90027355	spironolactone	approved;	C03DA01;	A potassium sparing diuretic that acts by antagonism of aldosterone in the distal renal tubules. It is used mainly in the treatment of refractory edema in patients with congestive heart failure, nephrotic syndrome, or hepatic cirrhosis. Its effects on the endocrine system are utilized in the treatments of hirsutism and acne but they can lead to adverse effects. (From Martindale, The Extra Pharmac…	Used primarily to treat low-renin hypertension, hypokalemia, and Conn's syndrome.	5833	0.496055	0.419872
DB00292	Etomidate	BRD-K55055802	BRD-K55055802	approved;	N01AX07;	Imidazole derivative anesthetic and hypnotic with little effect on blood gases, ventilation, or the cardiovascular system. It has been proposed as an induction anesthetic. [PubChem]	Used in the induction of general anesthesia.	667484	0.49464	0.422075
DB00758	Clopidogrel Bisulfate	BRD-K27721098	clopidogrel	approved;nutraceutical;	B01AC04;	This compound belongs to the class of organic compounds known as alpha amino acid esters. These are ester derivatives of alpha amino acids.	For the reduction of atherosclerotic events (myocardial infarction, stroke, and vascular death) in patients with atherosclerosis documented by recent stroke, recent myocardial infarction, or established peripheral arterial disease.	60606	0.49087	0.21934
DB00193	Tramadol Hydrochloride	BRD-K04412738	tramadol	approved;investigational;	N02AX02;N02AX52;	This compound belongs to the class of organic compounds known as anisoles. These are organic compounds containing a methoxybenzene or a derivative thereof.	Indicated in the treatment of moderate to severe pain. Consider for those prone to constipation or respiratory depression. Tramadol is used to treat postoperative, dental, cancer, and acute musculosketetal pain and as an adjuvant to NSAID therapy in patients with osteoarthritis.	33741	0.490245	0.0585
DB00593	Ethosuximide	BRD-A99633051	ethosuximide	approved;	N03AD01;N03AD51;	An anticonvulsant especially useful in the treatment of absence seizures unaccompanied by other types of seizures. [PubChem]	For the treatment of petit mal epilepsy.	3291	0.489875	0.074865
DB00868	Benzonatate	BRD-K91699951	benzonatate	approved;	R05DB01;	Benzonatate is a non-narcotic oral antitussive (cough suppressant) drug which works by anesthetizing the tissues of the lungs and pleura responsible for the cough reflex. It is chemically related to other ester anesthetics such as procaine. It has an anesthetic (numbing) action similar to that of benzocaine and numbs the stretch sensors in the lungs. It is the stretching of these sensors with bre…	For the symptomatic relief of cough. Has also been applied locally in the oral cavity in adults by releasing the drug from the liquid-filled capsules to provide oropharyngeal anesthesia for conscious intubation.	7699	0.48723	0.46952
DB01054	Nitrendipine	BRD-A02006392/BRD-A12560204	nitrendipine	approved;	C08CA08;C09BB06;	A calcium channel blocker with marked vasodilator action. It is an effective antihypertensive agent and differs from other calcium channel blockers in that it does not reduce glomerular filtration rate and is mildly natriuretic, rather than sodium retentive. [PubChem]	For the treatment of mild to moderate hypertension	4507	0.48643	0.312415
DB00966	Telmisartan	BRD-K73999723	telmisartan	approved;investigational;	C09CA07;C09DA07;C09DB04;	Telmisartan is an angiotensin II receptor antagonist (ARB) used in the management of hypertension. Generally, angiotensin II receptor blockers (ARBs) such as telmisartan bind to the angiotensin II type 1 (AT1) receptors with high affinity, causing inhibition of the action of angiotensin II on vascular smooth muscle, ultimately leading to a reduction in arterial blood pressure. Recent studies sugg…	Used alone or in combination with other classes of antihypertensives for the treatment of hypertension. Also used in the treatment of diabetic nephropathy in hypertensive patients with type 2 diabetes mellitus, as well as the treatment of congestive heart failure (only in patients who cannot tolerate ACE inhibitors).	65999	0.485815	0.250663
DB01153	Sertaconazole nitrate	BRD-A95939040	sertaconazole	approved;	D01AC14;G01AF19;	This compound belongs to the class of organic compounds known as benzothiophenes. These are organic compounds containing a benzene fused to a thiepine ring (a five-membered ring with six carbon atoms and one sulfur atom).	For the topical treatment of interdigital tinea pedis in immunocompetent patients 12 years of age and older, caused by &lt;i&gt;Trichophyton rubrum&lt;/i&gt;, &lt;i&gt;Trichophyton mentagrophytes&lt;/i&gt;, and &lt;i&gt;Epidermophyton floccosum&lt;/i&gt;.	65863	0.485585	0.061405
DB00783	Estradiol acetate	BRD-K18910433	estradiol	approved;investigational;vet_approved;	G02BB01;G03AA14;G03AB08;G03CA03;G03CA53;G03EA01;G03EA02;G03EA03;G03FA01;G03FA02;G03FA03;G03FA04;G03FA05;G03FA06;G03FA07;G03FA08;G03FA09;G03FA10;G03FA11;G03FA12;G03FA13;G03FA14;G03FA15;G03FA16;G03FA17;G03FB01;G03FB02;G03FB03;G03FB04;G03FB05;G03FB06;G03FB07;G03FB08;G03FB09;G03FB10;G03FB11;G03FB12;G03HB01;	This compound belongs to the class of organic compounds known as estrogens and derivatives. These are steroids with a structure containing a 3-hydroxylated estrane.	For the treatment of urogenital symptoms associated with post-menopausal atrophy of the vagina (such as dryness, burning, pruritus and dyspareunia) and/or the lower urinary tract (urinary urgency and dysuria).	5757	0.485205	0.059585
DB02300	Calcipotriol hydrate	BRD-K56429665	calcipotriol	approved;	D05AX02;D05AX52;	This compound belongs to the class of organic compounds known as triterpenoids. These are terpene molecules containing 8 isoprene units.	For the treatment of moderate plaque psoriasis in adults.	5288783	0.48448	0.024455
DB00370	Mirtazapine	BRD-A64977602	mirtazapine	approved;	N06AX11;	Mirtazapine is an antidepressant introduced by Organon International in 1996 used for the treatment of moderate to severe depression. Mirtazapine has a tetracyclic chemical structure and is classified as a noradrenergic and specific serotonergic antidepressant (NaSSA). It is the only tetracyclic antidepressant that has been approved by the Food and Drug Administration to treat depression. [Wikipe…	For the treatment of major depressive disorder.	4205	0.48436	0.437503
DB01601	Lopinavir	BRD-K99451608	lopinavir	approved;	J05AR10;	Lopinavir (ABT-378) is an antiretroviral of the protease inhibitor class. It is marketed by Abbott as Kaletra, a co-formulation with a sub-therapeutic dose of ritonavir, as a component of combination therapy to treat HIV/AIDS.	Indicated in combination with other antiretroviral agents for the treatment of HIV-infection.	92727	0.484255	0.407618
DB00603	Medroxyprogesterone acetate	BRD-K82216340	medroxyprogesterone	approved;investigational;		small molecule metabolic process	Used as a contraceptive and to treat secondary amenorrhea, abnormal uterine bleeding, pain associated with endometriosis, endometrial and renal cell carcinomas, paraphilia in males, GnRH-dependent forms of precocious puberty, as well as to prevent endometrial changes associated with estrogens.	6279	0.48274	0.468417
DB00959	Methylprednisolone acetate	BRD-K35240538	methylprednisolone	approved;vet_approved;	D07AA01;D07CA02;D10AA02;H02AB04;H02BX01;S01CA08;	This compound belongs to the class of organic compounds known as 21-hydroxysteroids. These are steroids carrying a hydroxyl group at the 21-position of the steroid backbone.	Adjunctive therapy for short-term administration in rheumatoid arthritis.	6741	0.48265	0.441195
DB00242	Cladribine	BRD-K93034159	cladribine	approved;investigational;	L01BB04;	An antineoplastic agent used in the treatment of lymphoproliferative diseases including hairy-cell leukemia. [PubChem]	For the treatment of active hairy cell leukemia (leukemic reticuloendotheliosis) as defined by clinically significant anemia, neutropenia, thrombocytopenia, or disease-related symptoms. Also used as an alternative agent for the treatment of chronic lymphocytic leukemia (CLL), low-grade non-Hodgkin's lymphoma, and cutaneous T-cell lymphoma.	20279	0.481415	0.257632
DB00400	Griseofulvin	BRD-K08273968	griseofulvin	approved;vet_approved;	D01AA08;D01BA01;	An antifungal antibiotic. Griseofulvin may be given by mouth in the treatment of tinea infections. [PubChem]	For the treatment of ringworm infections of the skin, hair, and nails, namely: tinea corporis, tinea pedis, tinea cruris, tinea barbae, cradle cap or other conditions caused by &lt;i&gt;Trichophyton&lt;/i&gt; or &lt;i&gt;Microsporum&lt;/i&gt; fungi.	441140	0.48014	0.0730775
DB00645	Dyclonine hydrochloride	BRD-K72259270	dyclonine	approved;	N01BX02;R02AD04;	This compound belongs to the class of organic compounds known as phenylpropylamines. These are compounds containing a phenylpropylamine moiety, which consists of a phenyl group substituted at the third carbon by an propan-1-amine.	Used to provide topical anesthesia of accessible mucous membranes prior to examination, endoscopy or instrumentation, or other procedures involving the esophagus, larynx, mouth, pharynx or throat, respiratory tract or trachea, urinary tract, or vagina. Also used to suppress the gag reflex and/or other laryngeal and esophageal reflexes to facilitate dental examination or procedures (including oral…	3180	0.47974	0.240957
DB00397	Phenylpropanolamine hydrochloride	BRD-K27853494	phenylpropanolamine	approved;vet_approved;withdrawn;	R01BA01;R01BA51;	This compound belongs to the class of organic compounds known as phenylpropanes. These are organic compounds containing a phenylpropane moiety.	For the treatment of nasal congestion, control of urinary incontinence, priapism and obesity.	26934	0.47892	0.0759425
DB01165	Ofloxacin	BRD-A24228527	ofloxacin	approved;	J01MA01;J01RA09;S01AE01;S02AA16;	A synthetic fluoroquinolone (fluoroquinolones) antibacterial agent that inhibits the supercoiling activity of bacterial DNA gyrase, halting DNA replication. [PubChem]	For the treatment of infections (respiratory tract, kidney, skin, soft tissue, UTI), urethral and cervical gonorrhoea.	4583	0.478545	0.04616
DB00358	Mefloquine Hydrochloride	BRD-A89585551	mefloquine	approved;	P01BC02;P01BF02;	This compound belongs to the class of organic compounds known as quinolines and derivatives. These are compounds containing a quinoline moiety, which consists of a benzene ring fused to a pyrimidine ring to form benzo[b]azabenzene.	For the treatment of mild to moderate acute malaria caused by Mefloquineuine-susceptible strains of &lt;i&gt;Plasmodium falciparum&lt;/i&gt; (both chloroquine-susceptible and resistant strains) or by &lt;i&gt;Plasmodium vivax&lt;/i&gt;. Also for the prophylaxis of &lt;i&gt;Plasmodium falciparum&lt;/i&gt; and &lt;i&gt;Plasmodium vivax&lt;/i&gt; malaria infections, including prophylaxis of chloroqu…	4046	0.477465	0.433532
DB00909	Zonisamide	BRD-K48300629	zonisamide	approved;investigational;	N03AX15;	Zonisamide is a sulfonamide anticonvulsant approved for use as an adjunctive therapy in adults with partial-onset seizures. Zonisamide may be a carbonic anhydrase inhibitor although this is not one of the primary mechanisms of action. Zonisamide may act by blocking repetitive firing of voltage-gated sodium channels leading to a reduction of T-type calcium channel currents, or by binding allosteri…	For use as adjunctive treatment of partial seizures in adults with epilepsy.	5734	0.475785	0.0339725
DB01238	Aripiprazole lauroxil	BRD-K70358946	aripiprazole	approved;investigational;	N05AX12;	This compound belongs to the class of organic compounds known as phenylpiperazines. These are compounds containing a phenylpiperazine skeleton, which consists of a piperazine bound to a phenyl group.	For the treatment of schizophrenia and related psychotic disorders.	60795	0.475075	0.214755
DB00428	Streptozocin	BRD-K34411947	streptozotocin	approved;	L01AD04;	An antibiotic that is produced by Stretomyces achromogenes. It is used as an antineoplastic agent and to induce diabetes in experimental animals. [PubChem]	For the treatment of malignant neoplasms of pancreas (metastatic islet cell carcinoma).	29327	0.473375	0.266692
DB08899	Enzalutamide	BRD-K56851771	enzalutamide	approved;	L02BB04;	Enzalutamide is an androgen receptor inhibitor for the treatment of castration-resistant prostate cancer. FDA approved on August 31, 2012.	Enzalutamide is indicated for the treatment of patients with metastatic castration-resistant prostate cancer who have previously received docetaxel.	15951529	0.473275	0.064325
DB00205	Pyrimethamine Hydrochloride	BRD-K88429204	pyrimethamine	approved;vet_approved;	P01BD01;P01BD51;P01BF04;	This compound belongs to the class of organic compounds known as phenylpyrimidines. These are polycyclic aromatic compounds containing a benzene ring linked to a pyrimidine ring through a CC or CN bond. Pyrimidine is a 6-membered ring consisting of four carbon atoms and two nitrogen centers at the 1- and 3- ring positions.	For the treatment of toxoplasmosis and acute malaria; For the prevention of malaria in areas non-resistant to pyrimethamine	4993	0.47312	0.028455
DB00643	Mebendazole	BRD-K77987382	mebendazole	approved;vet_approved;	P02CA01;P02CA51;	A benzimidazole that acts by interfering with carbohydrate metabolism and inhibiting polymerization of microtubules. [PubChem]	For the treatment of &lt;i&gt;Enterobius vermicularis&lt;/i&gt; (pinworm), &lt;i&gt;Trichuris trichiura&lt;/i&gt; (whipworm), &lt;i&gt;Ascaris lumbricoides&lt;/i&gt; (common roundworm), &lt;i&gt;Ancylostoma duodenale&lt;/i&gt; (common hookworm), &lt;i&gt;Necator americanus&lt;/i&gt; (American hookworm) in single or mixed infections.	4030	0.4706	0.0636475
DB06148	Mianserin hydrochloride	BRD-A19661776	mianserin	approved;	N06AX03;	This compound belongs to the class of organic compounds known as dibenzazepines. These are compounds with two benzene rings connected by an azepine ring. Azepine is an unsaturated seven-member heterocycle with one nitrogen atom replacing a carbon atom.	For the treatment of depression.	4184	0.468595	0.21508
DB00434	Cyproheptadine Hydrochloride	BRD-K28143534	cyproheptadine	approved;	R06AX02;	This compound belongs to the class of organic compounds known as dibenzocycloheptenes. These are compounds containing a dibenzocycloheptene moiety, which consists of two benzene connected by a cycloheptene ring.	For treatment of perennial and seasonal allergic rhinitis, vasomotor rhinitis, allergic conjunctivitis due to inhalant allergens and foods, mild uncomplicated allergic skin manifestations of urticaria and angioedema, amelioration of allergic reactions to blood or plasma, cold urticaria, dermatographism, and as therapy for anaphylactic reactions adjunctive to epinephrine.	2913	0.46504	0.391147
DB00973	Ezetimibe	BRD-K42260897	ezetimibe	approved;	C10AX09;C10BA02;C10BA05;C10BA06;	Ezetimibe is an anti-hyperlipidemic medication which is used to lower cholesterol levels. Specifically, it appears to bind to a critical mediator of cholesterol absorption, the Niemann-Pick C1-Like 1 (NPC1L1) protein on the gastrointestinal tract epithelial cells as well as in hepatocytes.	For use as adjunctive therapy to diet for the reduction of elevated total-C, LDL-C, and Apo B in patients with primary (heterozygous familial and non-familial) hypercholesterolemia.	150311	0.464725	0.0722725
DB00740	Riluzole Hydrochloride	BRD-K21283037	riluzole	approved;investigational;	N07XX02;	This compound belongs to the class of organic compounds known as benzothiazoles. These are organic compounds containing a benzene fused to a thiazole ring (a five-membered ring with four carbon atoms, one nitrogen atom and one sulfur atom).	For the treatment of amyotrophic lateral sclerosis (ALS, Lou Gehrig's Disease)	5070	0.46304	0.017905
DB00591	Fluocinolone Acetonide	BRD-K94353609	fluocinolone	approved;investigational;vet_approved;	C05AA10;D07AC04;D07BC02;D07CC02;S01BA15;S01CA10;S02BA08;S02CA05;	A glucocorticoid derivative used topically in the treatment of various skin disorders. It is usually employed as a cream, gel, lotion, or ointment. It has also been used topically in the treatment of inflammatory eye, ear, and nose disorders. (From Martindale, The Extra Pharmacopoeia, 30th ed, p732). It is also being investigated by Sivida and Alimera, under the brand name Medidur, as a sustained…	For the relief of the inflammatory and pruritic manifestations of corticosteroid-responsive dermatoses. Also for the treatment of chronic non-infectious uveitis affecting the posterior segment of the eye (Retisert).	6215	0.46235	0.0685425
DB00350	Minoxidil	BRD-K14888893	minoxidil	approved;	C02DC01;D11AX01;	A potent direct-acting peripheral vasodilator (vasodilator agents) that reduces peripheral resistance and produces a fall in blood pressure. (From Martindale, The Extra Pharmacopoeia, 30th ed, p371)	For the treatment of severe hypertension and in the topical treatment (regrowth) of androgenic alopecia in males and females and stabilisation of hair loss in patients with androgenic alopecia.	4201	0.4621	0.230327
DB00999	Hydrochlorothiazide	BRD-K13078532	hydrochlorothiazide	approved;vet_approved;	C03AA03;C03AB03;C03AX01;C03EA01;C09DX01;C09DX03;C09XA52;C09XA54;	A thiazide diuretic often considered the prototypical member of this class. It reduces the reabsorption of electrolytes from the renal tubules. This results in increased excretion of water and electrolytes, including sodium, potassium, chloride, and magnesium. It has been used in the treatment of several disorders including edema, hypertension, diabetes insipidus, and hypoparathyroidism. [PubChem]	For the treatment of high blood pressure and management of edema.	3639	0.45971	0.396325
DB00455	Loratadine	BRD-K82795137	loratadine	approved;	R06AX13;	Loratadine is a derivative of azatadine and a second-generation histamine H1 receptor antagonist used in the treatment of allergic rhinitis and urticaria. Unlike most classical antihistamines (histamine H1 antagonists) it lacks central nervous system depressing effects such as drowsiness. [PubChem]	A self-medication that is used alone or in combination with pseudoephedrine sulfate for the symptomatic relief of seasonal allergic rhinitis. Also used for the symptomatic relief of pruritus, erythema, and urticaria associated with chronic idiopathic urticaria in patients (not for children under 6 unless directed by a clincian).	3957	0.45852	0.38821
DB00649	Stavudine	BRD-K93880783	stavudine	approved;investigational;	J05AF04;J05AR07;	A dideoxynucleoside analog that inhibits reverse transcriptase and has in vitro activity against HIV. [PubChem]	For the treatment of human immunovirus (HIV) infections.	18283	0.458	0.07535
DB00181	Baclofen	BRD-A84174873	baclofen	approved;	M03BX01;	Baclofen is a gamma-amino-butyric acid (GABA) derivative used as a skeletal muscle relaxant. Baclofen stimulates GABA-B receptors leading to decreased frequency and amplitude of muscle spasms. It is especially useful in treating muscle spasticity associated with spinal cord injury. It appears to act primarily at the spinal cord level by inhibiting spinal polysynaptic afferent pathways and, to a l…	For the alleviation of signs and symptoms of spasticity resulting from multiple sclerosis, particularly for the relief of flexor spasms and concomitant pain, clonus, and muscular rigidity.	2284	0.457475	0.443755
DB00900	Didanosine	BRD-K99063460	didanosine	approved;	J05AF02;	A dideoxynucleoside compound in which the 3&amp;#39;-hydroxy group on the sugar moiety has been replaced by a hydrogen. This modification prevents the formation of phosphodiester linkages which are needed for the completion of nucleic acid chains. Didanosine is a potent inhibitor of HIV replication, acting as a chain-terminator of viral DNA by binding to reverse transcriptase; ddI is then metabol…	For use, in combination with other antiretroviral agents, in the treatment of HIV-1 infection in adults.	50599	0.45744	0.225192
DB01143	Amifostine trihydrate	BRD-K73947551	amifostine	approved;investigational;	V03AF05;	This compound belongs to the class of organic compounds known as organothiophosphorus compounds. These are organic derivatives of thiophosphonic acid, thiophosphoric acid, dithiophosphoric acid, or phosphorotrithioic acid, or derivatives thereof. Thiophosphonic acid, dithiophosphoric acid, thiophosphoric acid, and phosphorotrithioic acid are thiophosphorus compounds with the formula OP(O)(=S), OP…	For reduction in the cumulative renal toxicity in patients with ovarian cancer (using cisplatin) and moderate to severe xerostomia in patients undergoing post-operative radiation treatment for head and neck cancer.	2141	0.45699	0.189131
DB08916	Afatinib Dimaleate	BRD-K66175015	afatinib	approved;	L01XE13;	This compound belongs to the class of organic compounds known as quinazolinamines. These are heterocyclic aromatic compounds containing a quianazoline moiety substituted by one or more amine groups.	Afatinib is a kinase inhibitor indicated for the first-line treatment of patient with metastatic non-small cell lung cancer (NSCLC) whose tumours have epidermal growth factor receptor (EGFR) exon 19 deletions or exon 21 (L858R) substitution mutations as detected by an FDA-approved test.	10184653	0.45675	0.265275
DB01418	Acenocoumarol	BRD-A65051990	acenocoumarol	approved;	B01AA07;	Acenocoumarol is a coumarin derivative used as an anticoagulant. Coumarin derivatives inhibit the reduction of vitamin K by vitamin K reductase. This prevents carboxylation of vitamin K-dependent clotting factors, II, VII, XI and X, and interferes with coagulation. Hematocrit, hemoglobin, international normalized ratio and liver panel should be monitored. Patients on acenocoumarol are prohibited …	For the treatment and prevention of thromboembolic diseases. More specifically, it is indicated for the for the prevention of cerebral embolism, deep vein thrombosis, pulmonary embolism, thromboembolism in infarction and transient ischemic attacks. It is used for the treatment of deep vein thrombosis and myocardial infarction.	54676537	0.456015	0.18221
DB00567	Cefalexin hydrochloride	BRD-K90733503	cefalexin	approved;vet_approved;	J01DB01;	This compound belongs to the class of organic compounds known as n-acyl-alpha amino acids and derivatives. These are compounds containing an alpha amino acid (or a derivative thereof) which bears an acyl group at its terminal nitrogen atom.	For the treatment of respiratory tract infections caused by &lt;i&gt;Streptococcus pneumoniae&lt;/i&gt; and &lt;i&gt;Streptococcus pyogenes&lt;/i&gt;; otitis media due to &lt;i&gt;Streptococcus pneumoniae&lt;/i&gt;, &lt;i&gt;Haemophilus influenzae&lt;/i&gt;, &lt;i&gt;Staphylococcus aureus&lt;/i&gt;, &lt;i&gt;Streptococcus pyogenes&lt;/i&gt;, and &lt;i&gt;Moraxella catarrhalis&lt;/i&gt;; skin and …	27447	0.455915	0.224908
DB00809	Tropicamide	BRD-A79672927	tropicamide	approved;	S01FA06;S01FA56;	One of the muscarinic antagonists with pharmacologic action similar to atropine and used mainly as an ophthalmic parasympatholytic or mydriatic. [PubChem]	Indicated to induce mydriasis (dilation of the pupil) and cycloplegia (paralysis of the ciliary muscle of the eye) in diagnostic procedures, such as measurement of refractive errors and examination of the fundus of the eye.	5593	0.45577	0.0266525
DB00432	Trifluridine	BRD-K03243820	trifluridine	approved;	L01BC59;S01AD02;	An antiviral derivative of thymidine used mainly in the treatment of primary keratoconjunctivitis and recurrent epithelial keratitis due to herpes simplex virus. (From Martindale, The Extra Pharmacopoeia, 30th ed, p557)	Ophthalmic solution for the treatment of primay keratoconjunctivitis and recurrent epithelial keratitis due to herpes simplex virus, types 1 and 2.	6256	0.45549	0.230295
DB00564	Carbamazepine	BRD-K71799949	carbamazepine	approved;investigational;	N03AF01;	An anticonvulsant used to control grand mal and psychomotor or focal seizures. Its mode of action is not fully understood, but some of its actions resemble those of phenytoin; although there is little chemical resemblance between the two compounds, their three-dimensional structure is similar. [PubChem]	For the treatment of epilepsy and pain associated with true trigeminal neuralgia.	2554	0.454995	0.16227
DB01622	Thioproperazine	BRD-K08619574	thioproperazine	approved;	N05AB08;	drug transmembrane transport	For the treatment of all types of acute and chronic schizophrenia, including those which did not respond to the usual neuroleptics; manic syndromes.	9429	0.45345	0.386113
DB01244	Bepridil hydrochloride	BRD-A91008255	bepridil	approved;withdrawn;	C08EA02;	This compound belongs to the class of organic compounds known as phenylmethylamines. These are compounds containing a phenylmethtylamine moiety, which consists of a phenyl group substituted by an methanamine.	For the treatment of hypertension, and chronic stable angina (classic effort-associated angina).	2351	0.45293	0.421185
DB01599	Probucol	BRD-K72029282	probucol	approved;	C10AX02;	A drug used to lower LDL and HDL cholesterol yet has little effect on serum-triglyceride or VLDL cholesterol. (From Martindale, The Extra Pharmacopoeia, 30th ed, p993).	Used to lower LDL and HDL cholesterol.	4912	0.452215	0.233363
DB00680	moricizine hydrochloride	BRD-K21548250	moracizine	approved;withdrawn;	C01BG01;	This compound belongs to the class of organic compounds known as phenothiazines. These are polycyclic aromatic compounds containing a phenothiazine moiety, which is a linear tricyclic system that consists of a two benzene rings joined by a para-thiazine ring.	Used to treat irregular heartbeats (arrhythmias) and maintain a normal heart rate.	34633	0.4506	0.417953
DB04846	Celiprolol	BRD-A95602221	celiprolol	approved;investigational;	C07AB08;	Celiprolol is indicated for the management of mild to moderate hypertension and effort-induced angina pectoris. It has a unique pharmacology: it is a selective β1 receptor antagonist, but a β2 receptor partial agonist. It is also a weak α2 receptor antagonist. In 2010 a clinical trial has suggested a use for this medication in the prevention of vascular complications of a rare inherited disease c…	Celiprolol is indicated for the management of mild to moderate hypertension and effort-induced angina pectoris.	2663	0.450455	0.182727
DB00331	Metformin Hydrochloride	BRD-K79602928	metformin	approved;	A10BA02;A10BD02;A10BD03;A10BD05;A10BD07;A10BD08;A10BD10;A10BD11;A10BD13;A10BD14;A10BD15;A10BD16;A10BD17;A10BD18;A10BD20;	This compound belongs to the class of organic compounds known as biguanides. These are organic compounds containing two N-linked guanidines.	For use as an adjunct to diet and exercise in adult patients (18 years and older) with NIDDM. May also be used for the management of metabolic and reproductive abnormalities associated with polycystic ovary syndrome (PCOS). Jentadueto is for the treatment of patients when both linagliptin and metformin is appropriate.	4091	0.449785	0.397935
DB00527	Cinchocaine hydrochloride	BRD-K99121711	cinchocaine	approved;vet_approved;	C05AD04;D04AB02;N01BB06;S01HA06;S02DA04;	This compound belongs to the class of organic compounds known as quinoline carboxamides. These are quinolines in which the quinoline ring system is substituted by one or more carboxamide groups.	For production of local or regional anesthesia by infiltration techniques such as percutaneous injection and intravenous regional anesthesia by peripheral nerve block techniques such as brachial plexus and intercostal and by central neural techniques such as lumbar and caudal epidural blocks.	3025	0.449115	0.219087
DB04552	Niflumic Acid	BRD-K98763141	niflumic-acid	approved;	M01AX02;M02AA17;	An analgesic and anti-inflammatory agent used in the treatment of rheumatoid arthritis. [PubChem]	Used in the treatment of rheumatoid arthritis.	4488	0.44781	0.011445
DB00180	Flunisolide acetate	BRD-K49577446	flunisolide	approved;investigational;	R01AD04;R03BA03;	This compound belongs to the class of organic compounds known as 21-hydroxysteroids. These are steroids carrying a hydroxyl group at the 21-position of the steroid backbone.	For the maintenance treatment of asthma as a prophylactic therapy.	82153	0.446815	0.397505
DB00867	Ritodrine Hydrochloride	BRD-K51465424	ritodrine	approved;	G02CA01;	This compound belongs to the class of organic compounds known as phenethylamines. These are compounds containing a phenethylamine moiety, which consists of a phenyl group substituted at the second position by an ethan-1-amine.	For the treatment and prophylaxis of premature labour	33572	0.44651	0.230697
DB01166	Cilostazol	BRD-K67017579	cilostazol	approved;	B01AC23;	Cilostazol is a medication used in the alleviation of the symptom of intermittent claudication in individuals with peripheral vascular disease. It is manufactured by Otsuka Pharmaceutical Co. under the trade name Pletal. Although drugs similar to cilostazol have increased the risk of death in patients with congestive heart failure, studies of significant size have not addressed people without the…	For the reduction of symptoms of intermittent claudication (pain in the legs that occurs with walking and disappears with rest).	2754	0.44645	0.18856
DB00363	Clozapine	BRD-K37289225	clozapine	approved;	N05AH02;	A tricyclic dibenzodiazepine, classified as an atypical antipsychotic agent. It binds several types of central nervous system receptors, and displays a unique pharmacological profile. Clozapine is a serotonin antagonist, with strong binding to 5-HT 2A/2C receptor subtype. It also displays strong affinity to several dopaminergic receptors, but shows only weak antagonism at the dopamine D2 receptor…	For use in patients with treatment-resistant schizophrenia.	2818	0.445835	0.195683
DB00970	Dactinomycin	BRD-K70578146	dactinomycin	approved;	L01DA01;	A compound composed of a two cyclic peptides attached to a phenoxazine that is derived from streptomyces parvullus. It binds to DNA and inhibits RNA synthesis (transcription), with chain elongation more sensitive than initiation, termination, or release. As a result of impaired mRNA production, protein synthesis also declines after dactinomycin therapy. (From AMA Drug Evaluations Annual, 1993, p2…	For the treatment of Wilms' tumor, childhood rhabdomyosarcoma, Ewing's sarcoma and metastatic, nonseminomatous testicular cancer as part of a combination chemotherapy and/or multi-modality treatment regimen	457193	0.445545	0.246555
DB01172	Kanamycin sulfate	BRD-K08327065	kanamycin	approved;vet_approved;	A07AA08;J01GB04;S01AA24;	This compound belongs to the class of organic compounds known as amino sugars. These are sugars having one alcoholic hydroxy group replaced by an amino group; systematically known as x-amino-x-deoxymonosaccharides. These compounds do not include Glycosylamines.	For treatment of infections where one or more of the following are the known or suspected pathogens: &lt;i&gt;E. coli&lt;/i&gt;, &lt;i&gt;Proteus&lt;/i&gt; species (both indole-positive and indole-negative), &lt;i&gt;E. aerogenes, K. pneumoniae, S. marcescens,&lt;/i&gt; and &lt;i&gt;Acinetobacter&lt;/i&gt; species.	6032	0.44543	0.205
DB00712	Flurbiprofen Sodium	BRD-A86044036	flurbiprofen	approved;investigational;	M01AE09;M02AA19;R02AX01;S01BC04;	This compound belongs to the class of organic compounds known as biphenyls and derivatives. These are organic compounds containing to benzene rings linked together by a C-C bond.	Flurbiprofen tablets are indicated for the acute or long-term symptomatic treatment of rheumatoid arthritis, osteorarthritis and anklosing spondylitis. It may also be used to treat pain associated with dysmenorrhea and mild to moderate pain accompanied by inflammation (e.g. bursitis, tendonitis, soft tissue trauma). Topical ophthalmic formulations may be used pre-operatively to prevent intraopera…	3394	0.44493	0.20409
DB00297	Bupivacaine hydrochloride	BRD-A01636364	bupivacaine	approved;investigational;	N01BB01;N01BB51;	This compound belongs to the class of organic compounds known as alpha amino acid amides. These are amide derivatives of alpha amino acids.	For the production of local or regional anesthesia or analgesia for surgery, for oral surgery procedures, for diagnostic and therapeutic procedures, and for obstetrical procedures.	2474	0.44405	0.20026
DB01234	Dexamethasone acetate	BRD-K38775274	dexamethasone	approved;investigational;vet_approved;	A01AC02;C05AA09;D07AB19;D07CB04;D07XB05;D10AA03;H02AB02;R01AD03;R01AD53;S01BA01;S01CA01;S01CB01;S02BA06;S02CA06;S03BA01;S03CA01;	This compound belongs to the class of organic compounds known as 21-hydroxysteroids. These are steroids carrying a hydroxyl group at the 21-position of the steroid backbone.		5743	0.442565	0.386815
DB01140	Cefadroxil hemihydrate	BRD-K63242551	cefadroxil	approved;vet_approved;withdrawn;	J01DB05;	This compound belongs to the class of organic compounds known as cephalosporins. These are compounds containing a 1,2-thiazine fused to a 2-azetidinone to for a oxo-5-thia-1-azabicyclo[4.2.0]oct-2-ene-2-carboxylic acid moiety or a derivative thereof.	For the treatment of the following infections (skin, UTI, ENT) caused by; &lt;i&gt;S. pneumoniae, H. influenzae, staphylococci, S. pyogenes&lt;/i&gt; (group A beta-hemolytic streptococci), &lt;i&gt;E. coli, P. mirabilis, Klebsiella&lt;/i&gt; sp, coagulase-negative staphylococci and &lt;i&gt;Streptococcus pyogenes&lt;/i&gt;	47965	0.4415	0.280288
DB00498	Phenindione	BRD-K70592963	phenindione	approved;	B01AA02;	An indandione that has been used as an anticoagulant. Phenindione has actions similar to warfarin, but it is now rarely employed because of its higher incidence of severe adverse effects. (From Martindale, The Extra Pharmacopoeia, 30th ed, p234)	For the treatment of pulmonary embolism, cardiomyopathy, atrial fibrillation and flutter, cerebral embolism, mural thrombosis, and thrombophili. Also used for anticoagulant prophylaxis.	4760	0.440835	0.241773
DB01219	Dantrolene Sodium	BRD-K81272440	dantrolene	approved;	M03CA01;	This compound belongs to the class of organic compounds known as hydantoins. These are heterocyclic compounds containing an imidazolidine substituted by ketone group at positions 2 and 4.	For use, along with appropriate supportive measures, for the management of the fulminant hypermetabolism of skeletal muscle characteristic of malignant hyperthermia crises in patients of all ages. Also used preoperatively, and sometimes postoperatively, to prevent or attenuate the development of clinical and laboratory signs of malignant hyperthermia in individuals judged to be malignant hyperthe…	6914273	0.43952	0.0360175
DB00302	Tranexamic Acid	BRD-K15014948	tranexamic-acid	approved;	B02AA02;	Antifibrinolytic hemostatic used in severe hemorrhage. [PubChem]	For use in patients with hemophilia for short term use (two to eight days) to reduce or prevent hemorrhage and reduce the need for replacement therapy during and following tooth extraction. It can also be used for excessive bleeding in menstruation, surgery, or trauma cases.	5526	0.438995	0.051075
DB00309	Vindesine Sulfate	BRD-K59753975	vindesine	approved;	L01CA03;	This compound belongs to the class of organic compounds known as vinca alkaloids. These are alkaloids with a dimeric chemical structure composed of an indole nucleus (catharanthine), and a dihydroindole nucleus (vindoline), joined together.	For the treatment of acute leukaemia, malignant lymphoma, Hodgkin's disease, acute erythraemia and acute panmyelosis	40839	0.43767	0.23789
DB06151	Acetylcysteine amide	BRD-K59058747	acetylcysteine	approved;	R05CB01;S01XA08;V03AB23;	This compound belongs to the class of organic compounds known as n-acyl-aliphatic-alpha amino acids. These are alpha amino acids carrying a N-acylated aliphatic chain.	Acetylcysteine is used mainly as a mucolytic and in the management of paracetamol (acetaminophen) overdose.	12035	0.437205	0.0226328
DB00845	Clofazimine	BRD-K56614220	clofazimine	approved;investigational;	J04BA01;	A fat-soluble riminophenazine dye used for the treatment of leprosy. It has been used investigationally in combination with other antimycobacterial drugs to treat Mycobacterium avium infections in AIDS patients. Clofazimine also has a marked anti-inflammatory effect and is given to control the leprosy reaction, erythema nodosum leprosum. (From AMA Drug Evaluations Annual, 1993, p1619)	For the treatment of lepromatous leprosy, including dapsone-resistant lepromatous leprosy and lepromatous leprosy complicated by erythema nodosum leprosum.	2794	0.436535	0.22339
DB00336	Nitrofural	BRD-K79092138/BRD-K53815609	nitrofural	approved;vet_approved;	B05CA03;D08AF01;D09AA03;P01CC02;S01AX04;S02AA02;	A topical anti-infective agent effective against gram-negative and gram-positive bacteria. It is used for superficial wounds, burns, ulcers, and skin infections. Nitrofurazone has also been administered orally in the treatment of trypanosomiasis. [PubChem]	For the treatement of bacterial skin infections including pyodermas, infected dermatoses and infections of cuts, wounds, burns and ulcers due to susceptible organisms.	5447130	0.435105	0.243487
DB01136	Carvedilol phosphate	BRD-A10977446	carvedilol	approved;investigational;	C07AG02;	This compound belongs to the class of organic compounds known as carbazoles. These are compounds containing a three ring system containing a pyrrole ring fused on either side to a benzene ring.	For the treatment of mild or moderate (NYHA class II or III) heart failure of ischemic or cardiomyopathic origin.	2585	0.434825	0.212037
DB01119	Diazoxide	BRD-K73109821	diazoxide	approved;	C02DA01;V03AH01;	A benzothiadiazine derivative that is a peripheral vasodilator used for hypertensive emergencies. It lacks diuretic effect, apparently because it lacks a sulfonamide group. [PubChem]	Used parentally to treat hypertensive emergencies. Also used to treat hypoglycemia secondary to insulinoma.	3019	0.433985	0.247918
DB00525	Tolnaftate	BRD-K44273375	tolnaftate	approved;vet_approved;	D01AE18;	Tolnaftate is a synthetic over-the-counter anti-fungal agent. It may come as a cream, powder, spray, or liquid aerosol, and is used to treat jock itch, athlete's foot and ringworm. It is sold under several brand names, most notably Tinactin and Odor Eaters.	Tolnaftate topical is used to treat skin infections such as athlete's foot, jock itch, and ringworm infections. Tolnaftate is also used, along with other antifungals, to treat infections of the nails, scalp, palms, and soles of the feet. The powder and powder aerosol may be used to prevent athlete's foot.	5510	0.432995	0.416345
DB00938	Salmeterol xinafoate	BRD-A01320529	salmeterol	approved;	R03AC12;R03AK06;R03AK12;	This compound belongs to the class of organic compounds known as benzyl alcohols. These are organic compounds containing the phenylmethanol substructure.	For the treatment of asthma and chronic obstructive pulmonary disease (COPD).	5152	0.43286	0.426727
DB00892	Benoxinate hydrochloride	BRD-K04185004	oxybuprocaine	approved;	D04AB03;S01HA02;	This compound belongs to the class of organic compounds known as benzoic acid esters. These are ester derivatives of benzoic acid.	Used to temporarily numb the front surface of the eye so that the eye pressure can be measured or a foreign body removed.	4633	0.432775	0.0250575
DB00459	Acitretin	BRD-K90699611/BRD-K62012036	acitretin	approved;	D05BB02;	An oral retinoid effective in the treatment of psoriasis. It is the major metabolite of etretinate with the advantage of a much shorter half-life when compared with etretinate. [PubChem]	For the treatment of severe psoriasis in adults.	5284513	0.43234	0.171788
DB01086	Benzocaine hydrochloride	BRD-K75466013	benzocaine	approved;	C05AD03;D04AB04;N01BA05;R02AD01;	This compound belongs to the class of organic compounds known as benzoic acid esters. These are ester derivatives of benzoic acid.	For general use as a lubricant and topical anesthetic on esophagus, larynx, mouth, nasal cavity, rectum, respiratory tract or trachea, urinary tract, vagina. It is also used to suppress gag reflex.	2337	0.431905	0.224282
DB01393	Bezafibrate	BRD-K46018455	bezafibrate	approved;	C10AB02;	Antilipemic agent that lowers cholesterol and triglycerides. It decreases low density lipoproteins and increases high density lipoproteins. [PubChem]	For the treatment of primary hyperlipidaemia types IIa, IIb, III, IV and V (Fredrickson classification) corresponding to groups I, II and III of the European Atherosclerosis Society guidelines - when diet alone or improvements in lifestyle such as increased exercise or weight reduction do not lead to an adequate response. Also for the treatment of secondary hyperlipidaemias, e.g. severe hypertrig…	39042	0.43123	0.420913
DB01104	Sertraline Hydrochloride	BRD-K82036761	sertraline	approved;	N06AB06;	This compound belongs to the class of organic compounds known as tametralines. These are compounds containing a tametraline moiety, which consists of a tetrahydronaphthalene linked to a phenyl group to form N-methyl-4-phenyl-1,2,3,4-tetrahydronaphthalen-1-amine skeleton.	For the management of major depressive disorder, posttraumatic stress disorder, obsessive-compulsive disorder, panic disorder with or without agoraphobia, premenstrual dysphoric disorder, social phobia, premature ejaculation, and vascular headaches.	68617	0.43073	0.240313
DB01273	Varenicline tartrate	BRD-K18855837	varenicline	approved;investigational;	N07BA03;	This compound belongs to the class of organic compounds known as benzazepines. These are organic compounds containing a benzene ring fused to an azepine ring (unsaturated seven-membered heterocycle with one nitrogen atom replacing a carbon atom).	For use as an aid in smoking cessation.	5310966	0.43023	0.207265
DB00283	Clemastine fumarate	BRD-K30240666	clemastine	approved;	D04AA14;R06AA04;R06AA54;	This compound belongs to the class of organic compounds known as diphenylmethanes. These are compounds containing a diphenylmethane moiety, which consists of a methane wherein two hydrogen atoms are replaced by two phenyl groups.	For the relief of symptoms associated with allergic rhinitis such as sneezing, rhinorrhea, pruritus and acrimation. Also for the management of mild, uncomplicated allergic skin manifestations of urticaria and angioedema. Used as self-medication for temporary relief of symptoms associated with the common cold.	26987	0.430065	0.426737
DB00806	Pentoxifylline	BRD-K57569181	pentoxifylline	approved;investigational;	C04AD03;	A methylxanthine derivative that inhibits phosphodiesterase and affects blood rheology. It improves blood flow by increasing erythrocyte and leukocyte flexibility. It also inhibits platelet aggregation. Pentoxifylline modulates immunologic activity by stimulating cytokine production. [PubChem]	For the treatment of patients with intermittent lameness or immobility arising from chronic occlusive arterial disease of the limbs.	4740	0.429775	0.0571108
DB06228	Rivaroxaban	BRD-K37130656	rivaroxaban	approved;	B01AF01;	Rivaroxaban is an anticoagulant and the first orally active direct factor Xa inhibitor. Unlike warfarin, routine lab monitoring of INR is not necessary. However there is no antidote available in the event of a major bleed. Only the 10 mg tablet can be taken without regard to food. The 15 mg and 20 mg tablet should be taken with food. FDA approved on July 1, 2011.		9875401	0.429035	0.182113
DB00452	Framycetin sulfate	BRD-K71013094	neomycin	approved;	D09AA01;R01AX08;S01AA07;	This compound belongs to the class of organic compounds known as amino sugars. These are sugars having one alcoholic hydroxy group replaced by an amino group; systematically known as x-amino-x-deoxymonosaccharides. These compounds do not include Glycosylamines.	For the treatment of bacterial blepharitis, bacterial bonjunctivitis, corneal injuries, corneal ulcers and meibomianitis. For the prophylaxis of ocular infections following foreign body removal	8378	0.42766	0.412672
DB08439	Parecoxib	BRD-K13800121	parecoxib	approved;	M01AH04;	Parecoxib is a water-soluble and injectable prodrug of valdecoxib. It is marketed as Dynastat in the European Union. Parecoxib is a COX2 selective inhibitor in the same category as celecoxib (Celebrex) and rofecoxib (Vioxx). As it is injectable, it can be used perioperatively when patients are unable to take oral medications. It is approved through much of Europe for short term perioperative pain…	Used for short term perioperative pain control.	119828	0.427515	0.232992
DB01088	Iloprost	BRD-A45664787	iloprost	approved;investigational;	B01AC11;	Iloprost is a synthetic analogue of prostacyclin PGI2. Iloprost dilates systemic and pulmonary arterial vascular beds. It is used to treat pulmonary arterial hypertension (PAH).	Used for the treatment of pulmonary arterial hypertension.	5311181	0.425585	0.051195
DB00394	Beclomethasone dipropionate monohydrate	BRD-K97810537	beclometasone	approved;investigational;	A07EA07;D07AC15;D07CC04;R01AD01;R03AK08;R03BA01;	This compound belongs to the class of organic compounds known as gluco/mineralocorticoids, progestogins and derivatives. These are steroids with a structure based on a hydroxylated prostane moiety.	Used in the maintenance treatment of asthma as prophylactic therapy in patients 5 years of age and older, and in treating symptoms for allergic rhinitis (seasonal or perennial) in patients 12 years of age and older. Also being investigated for oral treatment in mild-to-moderate Crohn's disease of ileal or ileal-right colonic localisation and for topical use mild-to-moderate graft versus host dise…	21700	0.42534	0.048655
DB00590	Doxazosin	BRD-A13188892	doxazosin	approved;	C02CA04;	Doxazosin is a quinazoline-derivative that selectively antagonizes postsynaptic &amp;alpha;&lt;sub&gt;1&lt;/sub&gt;-adrenergic receptors. It may be used to mild to moderate hypertension and in the management of symptomatic benign prostatic hyperplasia (BPH). &amp;alpha;&lt;sub&gt;1&lt;/sub&gt;-Receptors mediate contraction and hypertrophic growth of smooth muscle cells. Antagonism of these recept…	For treatment and management of mild to moderate hypertension and urinary obstruction symptoms caused by BPH.	3157	0.424395	0.20408
DB01406	Danazol	BRD-K48970916	danazol	approved;	G03XA01;	A synthetic steroid with antigonadotropic and anti-estrogenic activities that acts as an anterior pituitary suppressant by inhibiting the pituitary output of gonadotropins. It possesses some androgenic properties. Danazol has been used in the treatment of endometriosis and some benign breast disorders. [PubChem]	For the treatment of endometriosis and fibrocystic breast disease (in patients unresponsive to simple measures). Also used for the prophylactic treatment of all types of hereditary angioedema in males and females.	28417	0.42439	0.201467
DB00451	Levothyroxine sodium	BRD-K30685142	levothyroxine	approved;	H03AA01;	This compound belongs to the class of organic compounds known as diphenylethers. These are aromatic compounds containing two benzene rings linked to each other through an ether group.	For use alone or in combination with antithyroid agents to treat hypothyroidism, goiter, chronic lymphocytic thyroiditis, myxedema coma, and stupor.	5819	0.42424	0.222055
DB00844	Nalbuphine hydrochloride	BRD-K66404838	nalbuphine	approved;	N02AF02;	This compound belongs to the class of organic compounds known as morphinans. These are polycyclic compounds with a four-ring skeleton with three condensed six-member rings forming a partially hydrogenated phenanthrene moiety, one of which is aromatic while the two others are alicyclic.	For the relief of moderate to severe pain.	5311304	0.4237	0.374375
DB00130	L-Glutamine	BRD-K83896451	glutamine	approved;investigational;nutraceutical;	A16AA03;	A non-essential amino acid present abundantly throughout the body and is involved in many metabolic processes. It is synthesized from glutamic acid and ammonia. It is the principal carrier of nitrogen in the body and is an important energy source for many cells. [PubChem]	Used for nutritional supplementation, also for treating dietary shortage or imbalance.	5961	0.42322	0.0678447
DB00312	Pentobarbital Sodium	BRD-A44448661	pentobarbital	approved;vet_approved;	N05CA01;	This compound belongs to the class of organic compounds known as barbituric acid derivatives. These are compounds containing a perhydropyrimidine ring substituted at C-2, -4 and -6 by oxo groups.	For the short-term treatment of insomnia.	4737	0.42307	0.386155
DB00389	Carbimazole	BRD-K87156652	carbimazole	approved;	H03BB01;	An imidazole antithyroid agent. Carbimazole is metabolized to methimazole, which is responsible for the antithyroid activity. [PubChem]	For the treatment of hyperthyroidism and thyrotoxicosis. It is also used to prepare patients for thyroidectomy.	31072	0.42287	0.415055
DB00357	Aminoglutethimide	BRD-A25234499	aminoglutethimide	approved;	L02BG01;	An aromatase inhibitor that produces a state of medical adrenalectomy by blocking the production of adrenal steroids. It also blocks the conversion of androgens to estrogens. Aminoglutethimide has been used in the treatment of advanced breast and prostate cancer. It was formerly used for its weak anticonvulsant properties. (From Martindale, The Extra Pharmacopoeia, 30th ed, p454)	For the suppression of adrenal function in selected patients with Cushing's syndrome, malignant neoplasm of the female breast, and carcinoma in situ of the breast.	2145	0.422665	0.26076
DB00537	Ciprofloxacin Hydrochloride	BRD-K04804440	ciprofloxacin	approved;investigational;	J01MA02;J01RA10;J01RA11;J01RA12;S01AE03;S02AA15;S03AA07;	This compound belongs to the class of organic compounds known as quinoline carboxylic acids. These are quinolines in which the quinoline ring system is substituted by a carboxyl group at one or more positions.	For the treatment of the following infections caused by susceptible organisms: urinary tract infections, acute uncomplicated cystitis, chronic bacterial prostatitis, lower respiratory tract infections, acute sinusitis, skin and skin structure infections, bone and joint infections, complicated intra-abdominal infections (used in combination with metronidazole), infectious diarrhea, typhoid fever (…	2764	0.422145	0.041395
DB00822	Disulfiram	BRD-K32744045	disulfiram	approved;	N07BB01;P03AA04;P03AA54;	A carbamate derivative used as an alcohol deterrent. It is a relatively nontoxic substance when administered alone, but markedly alters the intermediary metabolism of alcohol. When alcohol is ingested after administration of disulfiram, blood acetaldehyde concentrations are increased, followed by flushing, systemic vasodilation, respiratory difficulties, nausea, hypotension, and other symptoms (a…	For the treatment and management of chronic alcoholism	3117	0.421855	0.24678
DB00313	Divalproex sodium	BRD-K41260949	valproic-acid	approved;investigational;	N03AG01;	This compound belongs to the class of organic compounds known as methyl-branched fatty acids. These are fatty acids with an acyl chain that has a methyl branch. Usually, they are saturated and contain only one or more methyl group. However, branches other than methyl may be present.	For treatment and management of seizure disorders, mania, and prophylactic treatment of migraine headache. In epileptics, valproic acid is used to control absence seizures, tonic-clonic seizures (grand mal), complex partial seizures, and the seizures associated with Lennox-Gastaut syndrome.	3121	0.421355	0.135044
DB00890	Dienestrol	BRD-K95309561	dienestrol	approved;	G03CB01;G03CC02;	Dienestrol is a synthetic, non-steroidal estrogen. It is an estrogen receptor agonist. Estrogens work partly by increasing a normal clear discharge from the vagina and making the vulva and urethra healthy. Using or applying an estrogen relieves or lessens: dryness and soreness in the vagina, itching, redness, or soreness of the vulva. Conditions that are treated with vaginal estrogens include a g…	For use in the treatment of atrophic vaginitis and kraurosis vulvae.	667476	0.421195	0.107152
DB00978	Lomefloxacin hydrochloride	BRD-A75850590	lomefloxacin	approved;	J01MA07;S01AE04;	This compound belongs to the class of organic compounds known as quinoline carboxylic acids. These are quinolines in which the quinoline ring system is substituted by a carboxyl group at one or more positions.	For the treatment of bacterial infections of the respiratory tract (chronic bronchitis) and urinary tract, and as a pre-operative prophylactic to prevent urinary tract infection caused by: &lt;i&gt;S.pneumoniae&lt;/i&gt;, &lt;i&gt;H.influenzae&lt;/i&gt;, &lt;i&gt;S.aureus&lt;/i&gt;, &lt;i&gt;P.aeruginosa&lt;/i&gt;, &lt;i&gt;E. cloacae&lt;/i&gt;, &lt;i&gt;P. mirabilis&lt;/i&gt;, &lt;i&gt;C. civers…	3948	0.42076	0.374695
DB01110	Miconazole nitrate	BRD-A82396632	miconazole	approved;investigational;vet_approved;	A01AB09;A07AC01;D01AC02;D01AC52;G01AF04;J02AB01;S02AA13;	This compound belongs to the class of organic compounds known as benzylethers. These are aromatic ethers with the general formula ROCR' (R = alkyl, aryl; R'=benzene).	For topical application in the treatment of tinea pedis (athlete&amp;rsquo;s foot), tinea cruris, and tinea corporis caused by &lt;i&gt;Trichophyton rubrum&lt;/i&gt;, &lt;i&gt;Trichophyton mentagrophytes&lt;/i&gt;, and &lt;i&gt;Epidermophyton floccosum&lt;/i&gt;, in the treatment of cutaneous candidiasis (moniliasis), and in the treatment of tinea versicolor.	4189	0.42056	0.39757
DB00744	Zileuton	BRD-A56359832	zileuton	approved;investigational;withdrawn;		Leukotrienes are substances that induce numerous biological effects including augmentation of neutrophil and eosinophil migration, neutrophil and monocyte aggregation, leukocyte adhesion, increased capillary permeability, and smooth muscle contraction. These effects contribute to inflammation, edema, mucus secretion, and bronchoconstriction in the airways of asthmatic patients. Zileuton relieves …	For the prophylaxis and chronic treatment of asthma in adults and children 12 years of age and older.	60490	0.419505	0.244347
DB00393	Nimodipine	BRD-A24891640/BRD-A58048407	nimodipine	approved;	C08CA06;	Nimodipine is a 1,4-dihydropyridine calcium channel blocker. It acts primarily on vascular smooth muscle cells by stabilizing voltage-gated L-type calcium channels in their inactive conformation. By inhibiting the influx of calcium in smooth muscle cells, nimodipine prevents calcium-dependent smooth muscle contraction and subsequent vasoconstriction. Compared to other calcium channel blocking age…	For use as an adjunct to improve neurologic outcome following subarachnoid hemorrhage (SAH) from ruptured intracranial berry aneurysms by reducing the incidence and severity of ischemic deficits.	4497	0.419325	0.225501
DB01029	Irbesartan	BRD-K60038276	irbesartan	approved;investigational;	C09CA04;C09DA04;C09DB05;	Irbesartan is an angiotensin receptor blocker (ARB) used mainly for the treatment of hypertension. It competes with angiotensin II for binding at the AT1 receptor subtype. Unlike ACE inhibitors, ARBs do not have the adverse effect of dry cough. The use of ARBs is pending revision due to findings from several clinical trials suggesting that this class of drugs may be associated with a small increa…	For the treatment of hypertension, as well as diabetic nephropathy with an elevated serum creatinine and proteinuria (&amp;gt;300 mg/day) in patients with type 2 diabetes and hypertension. Irbesartan is also used as a second line agent in the treatment of congestive heart failure.	3749	0.418925	0.24535
DB00480	Lenalidomide	BRD-A17883755	lenalidomide	approved;	L04AX04;	Lenalidomide (initially known as CC-5013 and marketed as Revlimid? by Celgene) is a derivative of thalidomide introduced in 2004. It was initially intended as a treatment for multiple myeloma, for which thalidomide is an accepted therapeutic modality, but has also shown efficacy in the hematological disorders known as the myelodysplastic syndromes. [Wikipedia] FDA approved on December 27, 2005.	Lenalidomide is indicated for the treatment of multiple myeloma in combination with dexamethasone. It is also indicated for the treatment of patients with transfusion-dependent anemia due to low- or intermediate- risk myelodysplastic syndromes (MDS) associated with a deletion 5q cytogenetic abnormality with or without additional cytogenetic abnormalities.	216326	0.418915	0.2255
DB00722	Lisinopril	BRD-K67966701	lisinopril	approved;investigational;	C09AA03;C09BA03;C09BB03;C10BX07;	Lisinopril is a potent, competitive inhibitor of angiotensin-converting enzyme (ACE), the enzyme responsible for the conversion of angiotensin I (ATI) to angiotensin II (ATII). ATII regulates blood pressure and is a key component of the renin-angiotensin-aldosterone system (RAAS). Lisinopril may be used to treat hypertension and symptomatic congestive heart failure, to improve survival in certain…	For the treatment of hypertension and symptomatic congestive heart failure. May be used in conjunction with thrombolytic agents, aspirin and/or &amp;beta;-blockers to improve survival in hemodynamically stable individuals following myocardial infarction. May be used to slow the progression of renal disease in hypertensive patients with diabetes mellitus and microalbuminuria or overt nephropathy.	5362119	0.418845	0.233245
DB00734	Risperidone	BRD-K53857191	risperidone	approved;investigational;	N05AX08;	Risperidone, a benzisoxazole derivative, is an atypical antipsychotic drug with high affinity for 5-hydrotryptamine (5-HT) and dopamine D2 receptors. It is used primarily in the management of schizophrenia, inappropriate behavior in severe dementia and manic episodes associated with bipolar I disorder. Risperidone is effective for treating the positive and negative symptoms of schizophrenia owing…	For the treatment of schizophrenia in adults and in adolescents, ages 13 to 17, and for the short-term treatment of manic or mixed episodes of bipolar I disorder in children and adolescents ages 10 to 17. May also be used to manage symptoms of inappropriate behavior due to aggression and/or psychosis in patients with severe dementia.	5073	0.418425	0.223087
DB01041	Thalidomide	BRD-A93255169	thalidomide	approved;investigational;withdrawn;	L04AX02;	A piperidinyl isoindole originally introduced as a non-barbiturate hypnotic, but withdrawn from the market due to teratogenic effects. It has been reintroduced and used for a number of immunological and inflammatory disorders. Thalidomide displays immunosuppresive and anti-angiogenic activity. It inhibits release of tumor necrosis factor-alpha from monocytes, and modulates other cytokine action. …	For the acute treatment of the cutaneous manifestations of moderate to severe erythema nodosum leprosum (ENL). Also for use as maintenance therapy for prevention and suppression of the cutaneous manifestations of ENL recurrence.	5426	0.418165	0.18935
DB00709	3-TC	BRD-K02992638	lamivudine	approved;investigational;	J05AF05;J05AR01;J05AR02;J05AR04;J05AR05;J05AR07;J05AR11;J05AR12;J05AR13;J05AR16;	This compound belongs to the class of organic compounds known as 3'-thia pyrimidine nucleosides. These are nucleoside analogues with a structure that consists of a pyrimidine base, which is N-substituted at the 1-position with a 3'-thia derivative (1,3-oxazolidine) of the ribose moiety that is characteristic of nucleosides.	For the treatment of HIV infection and chronic hepatitis B (HBV).	60825	0.41792	0.060855
DB01182	Propafenone hydrochloride	BRD-A26334849	propafenone	approved;	C01BC03;	This compound belongs to the class of organic compounds known as chalcones and dihydrochalcones. These are organic compounds containing 1,3-Diphenylpropenone (benzylideneacetophenone), ArCH=CH(=O)Ar,or its derivatives formed by substitution.	Used to prolong the time to recurrence of paroxysmal atrial fibrillation/flutter (PAF) associated with disabling symptoms in patients without structural heart disease. Also used for the treatment of life-threatening documented ventricular arrhythmias, such as sustained ventricular tachycardia.	4932	0.417805	0.185292
DB01059	Norfloxacin	BRD-K11196887	norfloxacin	approved;	J01MA06;J01RA13;S01AE02;	A synthetic fluoroquinolone (fluoroquinolones) with broad-spectrum antibacterial activity against most gram-negative and gram-positive bacteria. Norfloxacin inhibits bacterial DNA gyrase. [PubChem]	For the treatment of urinary tract infection	4539	0.415955	0.211157
DB01056	Tocainide hydrochloride	BRD-A92670106	tocainide	approved;	C01BB03;	This compound belongs to the class of organic compounds known as alpha amino acid amides. These are amide derivatives of alpha amino acids.	For the treatment of documented ventricular arrhythmias, such as sustained ventricular tachycardia, that, in the judgment of the physician, are life-threatening.	38945	0.41586	0.229518
DB00834	Mifepristone	BRD-K37270826	mifepristone	approved;investigational;	G03XB01;G03XB51;	A progestational and glucocorticoid hormone antagonist. Its inhibition of progesterone induces bleeding during the luteal phase and in early pregnancy by releasing endogenous prostaglandins from the endometrium or decidua. As a glucocorticoid receptor antagonist, the drug has been used to treat hypercortisolism in patients with nonpituitary cushing syndrome [PubChem]. The two marketed forms of mi…	For the medical termination of intrauterine pregnancy through 49 days' pregnancy. Also indicated to control hyperglycemia secondary to hypercortisolism in adult patients with endogenous Cushing's syndrome who have type 2 diabetes mellitus or glucose intolerance and are not candidates for surgery or have had unsuccessful surgery.	55245	0.41579	0.226722
DB00449	Dipivefrin Hydrochloride	BRD-A47494775	dipivefrine	approved;	S01EA02;	This compound belongs to the class of organic compounds known as phenol esters. These are aromatic compounds containing a benzene ring substituted by a hydroxyl group and an ester group.	Dipivefrin is a prodrug which is used as initial therapy for the control of intraocular pressure in chronic open-angle glaucoma.	3105	0.415315	0.366822
DB00745	Modafinil	BRD-A16332958	modafinil	approved;investigational;	N06BA07;	Modafinil is a stimulant drug marketed as a 'wakefulness promoting agent' and is one of the stimulants used in the treatment of narcolepsy. Narcolepsy is caused by dysfunction of a family of wakefulness-promoting and sleep-suppressing peptides, the orexins, whose neurons are activated by modafinil. The prexin neuron activation is associated with psychoactivation and euphoria. The exact mechanism …	To improve wakefulness in patients with excessive daytime sleepiness (EDS) associated with narcolepsy.	4236	0.41501	0.02072
DB01198	Zopiclone	BRD-A34309505	zopiclone	approved;	N05CF01;	Zopiclone is a novel hypnotic agent used in the treatment of insomnia. Its mechanism of action is based on modulating benzodiazepine receptors. In addition to zopiclone's benzodiazepine pharmacological properties it also has some barbiturate like properties.	For the short-term treatment of insomnia.	5735	0.414765	0.18643
DB01222	Budesonide	BRD-A34299591	budesonide	approved;	A07EA06;D07AC09;R01AD05;R03AK07;R03AK12;R03BA02;	Budesonide is a glucocorticoid used in the management of asthma, the treatment of various skin disorders, and allergic rhinitis. [PubChem] The extended release oral tablet, marketed as Uceris, was FDA approved on January 14, 2013 for the management of ulcerative colitis. Budesonide is provided as a mixture of two epimers (22R and 22S). Interestingly, the 22R form is two times more active than the…	The oral capsule is used for the treatment of mild to moderate active Crohn's disease. The oral tablet is used for induction of remission in patients with active, mild to moderate ulcerative colitis. The oral inhalation formulation is used for the treatment of asthma, non-infectious rhinitis (including hay fever and other allergies), and for treatment and prevention of nasal polyposis.	5281004	0.414635	0.389375
DB04946	Iloperidone	BRD-K48722833	iloperidone	approved;	N05AX14;	Iloperidone is an atypical antipsychotic for the treatment of schizophrenia symptoms. Hoechst Marion Roussel Inc. made initial inquiries into the drug; however, in May 1996, they discontinued research, and in June 1997 gave research rights to Titan Pharmaceuticals. Titan then handed over worldwide development, manufacturing and marketing rights to Novartis in August 1998. On June 9, 2004, Titan P…	Treatment of acute schizophrenia.	71360	0.41433	0.02246
DB08877	Ruxolitinib Phosphate	BRD-K53972329	ruxolitinib	approved;	L01XE18;	This compound belongs to the class of organic compounds known as pyrrolopyrimidines. These are compounds containing a pyrrolopyrimidine moiety, which consists of a pyrrole ring fused to a pyrimidine. Pyrrole is 5-membered ring consisting of four carbon atoms and one nitrogen atom. Pyrimidine is a 6-membered ring consisting of four carbon atoms and two nitrogen centers at the 1- and 3- ring positi…	Treatment of intermediate or high-risk myelofibrosis, including primary myelofibrosis, post-polycythemia vera (post-PV) myelofibrosis and post-essential thrombocythemia (post-ET) myelofibrosis. [Lexicomp] Myeolofibrosis is the proliferation of abnormal bone marrow stem cells which cause fibrosis (the excessive formation of connective tissue).	25126798	0.412825	0.0122544
DB00891	Sulfapyridine	BRD-K41406082	sulfapyridine	approved;	J01EB04;	Antibacterial, potentially toxic, and previously used to treat certain skin diseases. No longer prescribed.	For the treatment of dermatitis herpetiformis, benign mucous membrane pemphigoid and pyoderma gangrenosum	5336	0.41217	0.368038
DB01016	Glyburide	BRD-K36927236	glibenclamide	approved;	A10BB01;	Glyburide is an oral antihyperglycemic agent used for the treatment of non-insulin-dependent diabetes mellitus (NIDDM). It belongs to the sulfonylurea class of insulin secretagogues, which act by stimulating &amp;beta; cells of the pancreas to release insulin. Sulfonylureas increase both basal insulin secretion and meal-stimulated insulin release. Medications in this class differ in their dose, r…	Indicated as an adjunct to diet to lower the blood glucose in patients with NIDDM whose hyperglycemia cannot be satisfactorily controlled by diet alone.	3488	0.41129	0.154168
DB00353	Methylergometrine maleate	BRD-K34685430	methylergometrine	approved;	G02AB01;G02AC01;	This compound belongs to the class of organic compounds known as lysergamides. These are amides of Lysergic acids.	For the prevention and control of excessive bleeding following vaginal childbirth	8226	0.410845	0.202527
DB01060	Amoxicillin sodium	BRD-K55044200	amoxicillin	approved;vet_approved;	A02BD01;A02BD03;A02BD04;A02BD05;A02BD06;A02BD07;A02BD10;A02BD11;J01CA04;J01CR02;	This compound belongs to the class of organic compounds known as penicillins. These are organic compounds containing the penicillin core structure, which is structurally characterized by a penam ring bearing two methyl groups at position 2, and an amide group at position 6 [starting from the sulfur atom at position 1].	For the treatment of infections of the ear, nose, and throat, the genitourinary tract, the skin and skin structure, and the lower respiratory tract due to susceptible (only b-lactamase-negative) strains of &lt;i&gt;Streptococcus&lt;/i&gt; spp. (a- and b-hemolytic strains only), &lt;i&gt;S. pneumoniae&lt;/i&gt;, &lt;i&gt;Staphylococcus&lt;/i&gt; spp., &lt;i&gt;H. influenzae&lt;/i&gt;, &lt;i&gt;E. …	33613	0.41015	0.0450225
DB00787	Aciclovir Sodium	BRD-K32318651	acyclovir	approved;	D06BB03;D06BB53;J05AB01;S01AD03;	This compound belongs to the class of organic compounds known as hypoxanthines. These are compounds containing the purine derivative 1H-purin-6(9H)-one. Purine is a bicyclic aromatic compound made up of a pyrimidine ring fused to an imidazole ring.	For the treatment and management of herpes zoster (shingles), genital herpes, and chickenpox.	2022	0.41003	0.02669
DB01606	Tazobactam sodium	BRD-K14312455	tazobactam	approved;	J01CG02;	This compound belongs to the class of organic compounds known as alpha amino acids and derivatives. These are amino acids in which the amino group is attached to the carbon atom immediately adjacent to the carboxylate group (alpha carbon), or a derivative thereof.	Used in combination with piperacillin to broaden the spectrum of piperacillin antibacterial action.	123630	0.40525	0.37213
DB00916	Metronidazole hydrochloride	BRD-K52020312	metronidazole	approved;	A01AB17;A02BD01;A02BD02;A02BD03;A02BD08;A02BD11;D06BX01;G01AF01;J01RA03;J01RA04;J01RA10;J01XD01;P01AB01;P01AB51;	This compound belongs to the class of organic compounds known as nitroimidazoles. These are compounds containing an imidazole ring which bears a nitro group.	For the treatment of anaerobic infections and mixed infections, surgical prophylaxis requiring anaerobic coverage, Clostridium difficile-associated diarrhea and colitis, Helicobacter pylori infection and duodenal ulcer disease, bacterial vaginosis, Giardia lamblia gastro-enteritis, amebiasis caused by Entamoeba histolytica, acne rosacea (topical treatment), and Trichomonas infections.	4173	0.403745	0.174407
DB00981	Physostigmine salicylate	BRD-K25650355	physostigmine	approved;	S01EB05;V03AB19;	This compound belongs to the class of organic compounds known as pyrroloindoles. These are compounds containing a pyrroloindole moiety, which is a tricyclic heterocycle which consists of a pyrrole ring fused to an indole. Pyrrole is 5-membered ring consisting of four carbon atoms and one nitrogen atom. Indole is a bicyclic compound consisting of a six-membered benzene ring fused to a five-membere…	For the treatment of glaucoma, and in the treatment of severe anticholinergic toxicity.	5983	0.403675	0.403675
DB00359	Sulfadiazine sodium	BRD-K32273377	sulfadiazine	approved;vet_approved;	J01EC02;J01EE02;J01EE06;	This compound belongs to the class of organic compounds known as aminobenzenesulfonamides. These are organic compounds containing a benzenesulfonamide moiety with an amine group attached to the benzene ring.	For the treatment of rheumatic fever and meningococcal meningitis	5215	0.403645	0.0184525
DB01067	Glipizide	BRD-K12219985	glipizide	approved;	A10BB07;	An oral hypoglycemic agent which is rapidly absorbed and completely metabolized. [PubChem]	For use as an adjunct to diet for the control of hyperglycemia and its associated symptomatology in patients with non-insulin-dependent diabetes mellitus (NIDDM; type II), formerly known as maturity-onset diabetes, after an adequate trial of dietary therapy has proved unsatisfactory.	3478	0.40303	0.0534075
DB00244	Mesalazine	BRD-K28849549	mesalazine	approved;	A07EC02;	An anti-inflammatory agent, structurally related to the salicylates, which is active in inflammatory bowel disease. It is considered to be the active moiety of sulphasalazine. (From Martindale, The Extra Pharmacopoeia, 30th ed)	For the treatment of active ulcerative proctitis.	4075	0.401115	0.032295
DB00829	Diazepam	BRD-K16508793	diazepam	approved;illicit;vet_approved;	N05BA01;	A benzodiazepine with anticonvulsant, anxiolytic, sedative, muscle relaxant, and amnesic properties and a long duration of action. Its actions are mediated by enhancement of gamma-aminobutyric acid activity. It is used in the treatment of severe anxiety disorders, as a hypnotic in the short-term management of insomnia, as a sedative and premedicant, as an anticonvulsant, and in the management of …	Used in the treatment of severe anxiety disorders, as a hypnotic in the short-term management of insomnia, as a sedative and premedicant, as an anticonvulsant, and in the management of alcohol withdrawal syndrome.	3016	0.40108	0.186473
DB01380	Cortisone acetate	BRD-K86161929	cortisone	approved;		Cortisone acetate is a steroid hormone that has both glucocoriticoid and mineral corticoid activities. Corticosteroids are used to provide relief for inflamed areas of the body. They lessen swelling, redness, itching, and allergic reactions. They are often used as part of the treatment for a number of different diseases, such as severe allergies or skin problems, asthma, or arthritis. Endogenous …	For the relief of the inflammatory and pruritic manifestations of corticosteroid-responsive dermatoses. Also used to treat endocrine (hormonal) disorders (adrenal insufficiency, Addisons disease). It is also used to treat many immune and allergic disorders.	5745	0.40082	0.019775
DB00754	Ethotoin	BRD-A30205217	ethotoin	approved;	N03AB01;	Ethotoin is a hydantoin derivative and anticonvulsant. Ethotoin exerts an antiepileptic effect without causing general central nervous system depression. The mechanism of action is probably very similar to that of phenytoin. The latter drug appears to stabilize rather than to raise the normal seizure threshold, and to prevent the spread of seizure activity rather than to abolish the primary focus…	For the control of tonic-clonic (grand mal) and complex partial (psychomotor) seizures.	3292	0.398575	0.369755
DB01128	Bicalutamide	BRD-A29485665	bicalutamide	approved;	L02BB03;	Bicalutamide is an oral non-steroidal anti-androgen for prostate cancer. It binds to the androgen receptor.	For treatment (together with surgery or LHRH analogue) of advanced prostatic cancer.	2375	0.397995	0.369355
DB01247	Isocarboxazid	BRD-K93332168	isocarboxazid	approved;	N06AF01;	An MAO inhibitor that is effective in the treatment of major depression, dysthymic disorder, and atypical depression. It also is useful in the treatment of panic disorder and the phobic disorders. (From AMA, Drug Evaluations Annual, 1994, p311)	May be used to treat major depressive disorder.	3759	0.397375	0.357432
DB00864	Tacrolimus hydrate	BRD-K69608737	tacrolimus	approved;investigational;	D11AH01;L04AD02;	This compound belongs to the class of organic compounds known as macrolide lactams. These are cyclic polyketides containing both a cyclic amide and a cyclic ester group.	For use after allogenic organ transplant to reduce the activity of the patient's immune system and so the risk of organ rejection. It was first approved by the FDA in 1994 for use in liver transplantation, this has been extended to include kidney, heart, small bowel, pancreas, lung, trachea, skin, cornea, and limb transplants. It has also been used in a topical preparation in the treatment of sev…	445643	0.39711	0.39711
DB01080	Vigabatrin	BRD-A07893380	vigabatrin	approved;	N03AG04;	An analogue of gamma-aminobutyric acid, vigabatrin is an irreversible inhibitor of 4-aminobutyrate transaminase, the enzyme responsible for the catabolism of gamma-aminobutyric acid. (From Martindale The Extra Pharmacopoeia, 31st ed). Off-label uses include treatment of cocaine dependence.	For use as an adjunct in treatment resistant epilepsy, refractory complex partial seizures, and secondary generalized seizures. It is also used as monotherapy in infantile spasms in West syndrome.	5665	0.396515	0.368752
DB02701	Nicotinamide	BRD-K28912512	nicotinamide	approved;	A11HA01;	An important compound functioning as a component of the coenzyme NAD. Its primary significance is in the prevention and/or cure of blacktongue and pellagra. Most animals cannot manufacture this compound in amounts sufficient to prevent nutritional deficiency and it therefore must be supplemented through dietary intake. [PubChem]		936	0.39637	0.39283
DB00213	Pantoprazole Magnesium	BRD-A22380646	pantoprazole	approved;	A02BC02;A02BD04;A02BD11;	This compound belongs to the class of organic compounds known as sulfinylbenzimidazoles. These are polycyclic aromatic compounds containing a sulfinyl group attached at the position 2 of a benzimidazole moiety.	Short-term (up to 16 weeks) treatment of erosive esophagitis.	4679	0.39629	0.19594
DB00555	Lamotrigine	BRD-K93460210	lamotrigine	approved;investigational;	N03AX09;	Lamotrigine is an anticonvulsant drug used in the treatment of epilepsy and bipolar disorder. For epilepsy it is used to treat partial seizures, primary and secondary tonic-clonic seizures, and seizures associated with Lennox-Gastaut syndrome. Lamotrigine also acts as a mood stabilizer. It is the first medication since lithium granted Food and Drug Administration (FDA) approval for the maintenanc…	For the adjunctive treatment of partial seizures in epilepsy and generalized seizures of Lennox-Gastaut syndrome. Also for the maintenance treatment of bipolar I disorder and depression.	3878	0.39557	0.201352
DB00678	Losartan Potassium	BRD-K76205745	losartan	approved;	C09CA01;C09DA01;C09DB06;	This compound belongs to the class of organic compounds known as biphenyltetrazoles and derivatives. These are organic compounds containing a biphenyl attached to a tetrazole. A carbon atom of the biphenyl moiety is boned to a carbon or the nitrogen atom of the tetrazole moiety.	May be used as a first line agent to treat uncomplicated hypertension, isolated systolic hypertension and left ventricular hypertrophy. May be used as a first line agent to delay progression of diabetic nephropathy. Losartan may be also used as a second line agent in the treatment of congestive heart failure, systolic dysfunction, myocardial infarction and coronary artery disease in those intoler…	3961	0.39524	0.0026
DB00490	Buspirone Hydrochloride	BRD-K93461745	buspirone	approved;investigational;	N05BE01;	This compound belongs to the class of organic compounds known as n-arylpiperazines. These are organic compounds containing a piperazine ring where the nitrogen ring atom carries an aryl group.	For the management of anxiety disorders or the short-term relief of the symptoms of anxiety, and also as an augmention of SSRI-treatment against depression.	2477	0.39488	0.174047
DB00749	Etodolac	BRD-A74667430	etodolac	approved;investigational;vet_approved;	M01AB08;	Etodolac is a non-steroidal anti-inflammatory drug (NSAID) with anti-inflammatory, analgesic and antipyretic properties. Its therapeutic effects are due to its ability to inhibit prostaglandin synthesis. It is indicated for relief of signs and symptoms of rheumatoid arthritis and osteoarthritis.	For acute and long-term management of signs and symptoms of osteoarthritis and rheumatoid arthritis, as well as for the management of pain.	3308	0.394235	0.221585
DB01129	Rabeprazole Sodium	BRD-A39390670	rabeprazole	approved;investigational;	A02BC04;A02BC54;M01AA05;M02AA03;	This compound belongs to the class of organic compounds known as sulfinylbenzimidazoles. These are polycyclic aromatic compounds containing a sulfinyl group attached at the position 2 of a benzimidazole moiety.	For the treatment of acid-reflux disorders (GERD), peptic ulcer disease, H. pylori eradication, and prevention of gastroinetestinal bleeds with NSAID use.	5029	0.39208	0.173508
DB01090	Pentolinium tartrate	BRD-K44942604	pentolinium	approved;		This compound belongs to the class of organic compounds known as n-alkylpyrrolidines. These are compounds containing a pyrrolidine moiety that is substituted at the N1-position with an alkyl group. Pyrrolidine is a five-membered saturated aliphatic heterocycle with one nitrogen atom and four carbon atoms.	Used to produce controlled hypotension during surgical procedures and in hypertensive crises.	5850	0.392035	0.373318
DB06777	Chenodeoxycholic acid	BRD-K18135438	chenodeoxycholic-acid	approved;	A05AA01;	Chenodeoxycholic acid (or Chenodiol) is an epimer of ursodeoxycholic acid (DB01586). Chenodeoxycholic acid is a bile acid naturally found in the body. It works by dissolving the cholesterol that makes gallstones and inhibiting production of cholesterol in the liver and absorption in the intestines, which helps to decrease the formation of gallstones. It can also reduce the amount of other bile ac…	Chenodiol is indicated for patients with radiolucent stones in well-opacifying gallbladders, in whom selective surgery would be undertaken except for the presence of increased surgical risk due to systemic disease or age. Chenodiol will not dissolve calcified (radiopaque) or radiolucent bile pigment stones.	10133	0.391365	0.386015
DB01013	Clobetasol propionate	BRD-K10799896	clobetasol	approved;		A derivative of prednisolone with high glucocorticoid activity and low mineralocorticoid activity. Absorbed through the skin faster than fluocinonide, it is used topically in treatment of psoriasis but may cause marked adrenocortical suppression. [PubChem]	For short-term topical treatment of the inflammatory and pruritic manifestations of moderate to severe corticosteroid-responsive dermatoses of the scalp.	32798	0.39131	0.03953
DB01197	Captopril	BRD-K54529596	captopril	approved;	C09AA01;C09BA01;	Captopril is a potent, competitive inhibitor of angiotensin-converting enzyme (ACE), the enzyme responsible for the conversion of angiotensin I (ATI) to angiotensin II (ATII). ATII regulates blood pressure and is a key component of the renin-angiotensin-aldosterone system (RAAS). Captopril may be used in the treatment of hypertension.	For the treatment of essential or renovascular hypertension (usually administered with other drugs, particularly thiazide diuretics). May be used to treat congestive heart failure in combination with other drugs (e.g. cardiac glycosides, diuretics, &amp;beta;-adrenergic blockers). May improve survival in patients with left ventricular dysfunction following myocardial infarction. May be used to tr…	44093	0.39119	0.15292
DB00968	Methyldopa hydrochloride	BRD-K48578705	methyldopa	approved;		This compound belongs to the class of organic compounds known as catecholamines and derivatives. These are compounds containing 4-(2-Aminoethyl)pyrocatechol [4-(2-aminoethyl)benzene-1,2-diol] or a derivative thereof formed by substitution.	For use in the treatment of hypertension.	38853	0.390375	0.370028
DB01124	Tolbutamide sodium	BRD-K85119730	tolbutamide	approved;	A10BB03;V04CA01;	This compound belongs to the class of organic compounds known as benzenesulfonamides. These are organic compounds containing a sulfonamide group that is S-linked to a benzene ring.	For treatment of NIDDM (non-insulin-dependent diabetes mellitus) in conjunction with diet and exercise.	5505	0.3903	0.00148
DB00346	Alfuzosin Hydrochloride	BRD-A09056319	alfuzosin	approved;investigational;	G04CA01;G04CA51;	This compound belongs to the class of organic compounds known as quinazolinamines. These are heterocyclic aromatic compounds containing a quianazoline moiety substituted by one or more amine groups.	For the reduction of urinary obstruction and relief of associated manifestations (eg. sensation of incomplete bladder emptying or straining, urgency, interrupted or weak stream) in patients with symptomatic beningn prostatic hyperplasia.	2092	0.39028	0.375978
DB00222	Glimepiride	BRD-K34776109	glimepiride	approved;	A10BB12;A10BD04;A10BD06;	Glimepiride is the first III generation sulphonyl urea it is a very potent sulphonyl urea with long duration of action.	For concomitant use with insulin for the treatment of noninsulin-dependent (type 2) diabetes mellitus.	3476	0.39015	0.201662
DB01176	Cyclizine chloride	BRD-K79501723	cyclizine	approved;	R06AE03;R06AE53;	This compound belongs to the class of organic compounds known as diphenylmethanes. These are compounds containing a diphenylmethane moiety, which consists of a methane wherein two hydrogen atoms are replaced by two phenyl groups.	For prevention and treatment of nausea, vomiting, and dizziness associated with motion sickness, and vertigo (dizziness caused by other medical problems).	6726	0.388955	0.137517
DB01325	Quinethazone	BRD-A59303141	quinethazone	approved;	C03BA02;C03BB02;	Quinethazone (INN, brand name Hydromox) is a thiazide diuretic used to treat hypertension. Common side effects include dizziness, dry mouth, nausea, and low potassium levels.	Used to treat hypertension.	6307	0.38883	0.205682
DB00521	Carteolol Hydrochloride	BRD-A42167015	carteolol	approved;	C07AA15;S01ED05;S01ED55;	This compound belongs to the class of organic compounds known as hydroquinolones. These are compounds containing a hydrogenated quinoline bearing a ketone group.	For the treatment of intraocular hypertension and chronic open-angle glaucoma	2583	0.388055	0.0212
DB01235	Levodopa	BRD-K34730807	levodopa	approved;	N04BA01;N04BA02;N04BA03;	The naturally occurring form of dihydroxyphenylalanine and the immediate precursor of dopamine. Unlike dopamine itself, it can be taken orally and crosses the blood-brain barrier. It is rapidly taken up by dopaminergic neurons and converted to dopamine. It is used for the treatment of parkinsonian disorders and is usually given with agents that inhibit its conversion to dopamine outside of the ce…	For the treatment of idiopathic Parkinson's disease (Paralysis Agitans), postencephalitic parkinsonism, symptomatic parkinsonism which may follow injury to the nervous system by carbon monoxide intoxication, and manganese intoxication.	6047	0.387745	0.367557
DB00154	Dihomo-gamma-linolenic acid	BRD-K20152659	gamma-homolinolenic-acid	approved;nutraceutical;		A 20-carbon-chain fatty acid, unsaturated at positions 8, 11, and 14. It differs from arachidonic acid, 5,8,11,14-eicosatetraenoic acid, only at position 5. [PubChem]	For nutritional supplementation, also for treating dietary shortage or imbalance	5280581	0.38723	0.368085
DB01178	Chlormezanone	BRD-A20348246	chlormezanone	approved;withdrawn;	M03BB02;M03BB52;M03BB72;	A non-benzodiazepine that is used in the management of anxiety. It has been suggested for use in the treatment of muscle spasm. [PubChem]	Used in the management of anxiety and in the treatment of muscle spasm.	2717	0.38666	0.185152
DB00605	Sulindac	BRD-A13946108	sulindac	approved;	M01AB02;	Sulindac is a nonsteroidal anti-inflammatory agent (NSAIA) of the arylalkanoic acid class that is marketed in the U.S. by Merck as Clinoril. Like other NSAIAs, it may be used in the treatment of acute or chronic inflammatory conditions. Sulindac is a prodrug, derived from sulfinylindene, that is converted in vivo to an active sulfide compound by liver enzymes. The sulfide metabolite then undergoe…	For acute or long-term use in the relief of signs and symptoms of osteoarthritis, rheumatoid arthritis, ankylosing spondylitis, acute painful shoulder (acute subacromial bursitis/supraspinatus tendinitis), and acute gouty arthritis.	1548887	0.386115	0.03971
DB04794	Bifonazole	BRD-A94543220	bifonazole	approved;	D01AC10;D01AC60;	Bifonazole is an azole antifungal drug. [Wikipedia]	Used for the treatment of various topical fungal infections, including athlete's foot (tinea pedis).	2378	0.384265	0.20033
DB00426	Famciclovir	BRD-K45033733	famciclovir	approved;	J05AB09;S01AD07;	response to organonitrogen compound	For the treatment of acute herpes zoster (shingles). Also for the treatment or suppression of recurrent genital herpes in immunocompetent patients and treatment of recurrent mucocutaneous herpes simplex infections in HIV infected patients.	3324	0.383945	0.181775
DB00692	Phentolamine Mesylate	BRD-K90333595	phentolamine	approved;	C04AB01;V03AB36;	This compound belongs to the class of organic compounds known as alkyldiarylamines. These are tertiary alkylarylamines having two aryl and one alkyl groups attached to the amino group.	Used as an aid for the diagnosis of pheochromocytoma, and may be administered immediately prior to or during pheochromocytomectomy to prevent or control paroxysmal hypertension resulting from anesthesia, stress, or operative manipulation of the tumor. Phentolamine has also been used to treat hypertensive crisis caused by sympathomimetic amines or catecholamine excess by certain foods or drugs in …	5775	0.383675	0.382885
DB00870	Suprofen	BRD-A34006693	suprofen	approved;withdrawn;	M01AE07;	An ibuprofen-type anti-inflammatory analgesic and antipyretic. It inhibits prostaglandin synthesis and has been proposed as an anti-arthritic. It is no longer approved for use in the United States.	Used as eye drops to inhibit the miosis (pupil constriction) that may occur during ocular surgery.	5359	0.382145	0.0025875
DB00855	Aminolevulinic acid hydrochloride	BRD-K57631554	aminolevulinic-acid	approved;	L01XD04;	This compound belongs to the class of organic compounds known as delta amino acids and derivatives. These are compounds containing a carboxylic acid group and an amino group at the C5 carbon atom.	Aminolevulinic acid plus blue light illumination using a blue light photodynamic therapy illuminator is indicated for the treatment of minimally to moderately thick actinic keratoses of the face or scalp.	137	0.38144	0.130857
DB00280	Disopyramide phosphate	BRD-A29734509	disopyramide	approved;	C01BA03;	This compound belongs to the class of organic compounds known as pheniramines. These are compounds containing a pheniramine moiety, which is structurally characterized by the presence of a 2-benzylpyridine linked to an dimethyl(propyl)amine to form a dimethyl[3-phenyl-3-(pyridin-2-yl)propyl]amine skeleton.	For the treatment of documented ventricular arrhythmias, such as sustained ventricular tachycardia, ventricular pre-excitation and cardiac dysrhythmias. It is a Class Ia antiarrhythmic drug.	3114	0.380175	0.01176
DB00967	Desloratadine	BRD-K82357231	desloratadine	approved;investigational;	R06AX27;	Desloratadine is a second generation, tricyclic antihistamine that which has a selective and peripheral H1-antagonist action. It is the active descarboethoxy metabolite of loratidine (a second generation histamine). Desloratidine has a long-lasting effect and does not cause drowsiness because it does not readily enter the central nervous system.	For the relief of symptoms of seasonal allergic rhinitis, perennial (non-seasonal) allergic rhinitis. Desloratidine is also used for the sympomatic treatment of pruritus and urticaria (hives) associated with chronic idiopathic urticaria.	124087	0.38007	0.172597
DB00356	Chlorzoxazone	BRD-K98174813	chlorzoxazone	approved;	M03BB03;M03BB53;M03BB73;	A centrally acting central muscle relaxant with sedative properties. It is claimed to inhibit muscle spasm by exerting an effect primarily at the level of the spinal cord and subcortical areas of the brain. (From Martindale, The Extra Pharmacopoea, 30th ed, p1202)	For the relief of discomfort associated with acute painful musculoskeletal conditions.	2733	0.377955	0.233987
DB00091	Cyclosporine	BRD-A69815203	cyclosporin-a	approved;investigational;vet_approved;	L04AD01;S01XA18;	A cyclic undecapeptide from an extract of soil fungi. It is a powerful immunosupressant with a specific action on T-lymphocytes. It is used for the prophylaxis of graft rejection in organ and tissue transplantation. Cyclosporine is produced as a metabolite by the fungus species Cordyceps militaris. (From Martindale, The Extra Pharmacopoeia, 30th ed).	For treatment of transplant (kidney, liver, and heart) rejection, rheumatoid arthritis, severe psoriasis.	5280754	0.376965	0.376965
DB00795	Sulfasalazine	BRD-K10670311	sulfasalazine	approved;	A07EC01;	A drug that is used in the management of inflammatory bowel diseases. Its activity is generally considered to lie in its metabolic breakdown product, 5-aminosalicylic acid (see mesalamine) released in the colon. (From Martindale, The Extra Pharmacopoeia, 30th ed, p907)	For the treatment of Crohn's disease and rheumatoid arthritis as a second-line agent.	5359476	0.375815	0.19394
DB00576	Sulfamethizole	BRD-K31682896	sulfamethizole	approved;vet_approved;	B05CA04;D06BA04;J01EB02;S01AB01;	A sulfathiazole antibacterial agent. [PubChem]	For the treatment of urinary tract infection	5328	0.375205	0.159995
DB00338	Omeprazole magnesium	BRD-A55962179	omeprazole	approved;investigational;vet_approved;	A02BC01;A02BD01;A02BD05;	This compound belongs to the class of organic compounds known as sulfinylbenzimidazoles. These are polycyclic aromatic compounds containing a sulfinyl group attached at the position 2 of a benzimidazole moiety.	Omeprazole is indicated for the treatment of duodenal ulcers, benign gastric ulcers, gastroesophageal reflux disease (GERD), heartburn and other symptoms associated with GERD, erosive esophagitis, and long-term treatment of pathological hypersecretory conditions like Zollinger-Ellison syndrome, multiple endocrine adenomas, and systemic mastocytosis.	4594	0.374745	0.170685
DB00774	Hydroflumethiazide	BRD-K36862742	hydroflumethiazide	approved;	C03AA02;C03AB02;C03AH02;	A thiazide diuretic with actions and uses similar to those of hydrochlorothiazide. (From Martindale, The Extra Pharmacopoeia, 30th ed, p822)	Used as adjunctive therapy in edema associated with congestive heart failure, hepatic cirrhosis, and corticosteroid and estrogen therapy. Also used in the management of hypertension either as the sole therapeutic agent or to enhance the effect of other antihypertensive drugs in the more severe forms of hypertension.	3647	0.37459	0.0189375
DB00404	Alprazolam	BRD-K32398298	alprazolam	approved;illicit;investigational;	N05BA12;	A triazolobenzodiazepine compound with antianxiety and sedative-hypnotic actions, that is efficacious in the treatment of panic disorders, with or without agoraphobia, and in generalized anxiety disorders. (From AMA Drug Evaluations Annual, 1994, p238)	For the management of anxiety disorder or the short-term relief of symptoms of anxiety and for the treatment of panic disorder, with or without agoraphobia.	2118	0.37405	0.204695
DB00251	Terconazole	BRD-K86204871	terconazole	approved;	G01AG02;	Terconazole is an anti-fungal medication, primarily used to treat vaginal fungal infections. [Wikipedia]	For the treatment of candidiasis (a yeast-like fungal infection) of the vulva and vagina.	441383	0.373635	0.358775
DB00392	Ethopropazine hydrochloride	BRD-A16311756	profenamine	approved;	N04AA05;	This compound belongs to the class of organic compounds known as phenothiazines. These are polycyclic aromatic compounds containing a phenothiazine moiety, which is a linear tricyclic system that consists of a two benzene rings joined by a para-thiazine ring.	For use in the treatment of Parkinson's disease and also used to control severe reactions to certain medicines such as reserpine.	3290	0.37224	0.0023725
DB01184	Domperidone	BRD-K38305202	domperidone	approved;investigational;vet_approved;	A03FA03;	A specific blocker of dopamine receptors. It speeds gastrointestinal peristalsis, causes prolactin release, and is used as antiemetic and tool in the study of dopaminergic mechanisms. [PubChem]	For management of dyspepsia, heartburn, epigastric pain, nausea, and vomiting.	3151	0.37119	0.37119
DB01138	Sulfinpyrazone	BRD-A36217750	sulfinpyrazone	approved;	M04AB02;	A uricosuric drug that is used to reduce the serum urate levels in gout therapy. It lacks anti-inflammatory, analgesic, and diuretic properties. [PubChem]	For the treatment of gout and gouty arthritis.	5342	0.369045	0.17237
DB00731	SDZ-DJN 608	BRD-K44353683	nateglinide	approved;investigational;	A10BX03;	This compound belongs to the class of organic compounds known as n-acyl-aliphatic-alpha amino acids. These are alpha amino acids carrying a N-acylated aliphatic chain.	For the treatment of non-insulin dependent-diabetes mellitus in conjunction with diet and exercise.	5311309	0.36845	0.00801
DB00800	Fenoldopam mesylate	BRD-A50684349	fenoldopam	approved;	C01CA19;	This compound belongs to the class of organic compounds known as benzazepines. These are organic compounds containing a benzene ring fused to an azepine ring (unsaturated seven-membered heterocycle with one nitrogen atom replacing a carbon atom).	For the in-hospital, short-term (up to 48 hours) management of severe hypertension when rapid, but quickly reversible, emergency reduction of blood pressure is clinically indicated, including malignant hypertension with deteriorating end-organ function.	3341	0.36803	0.206695
DB00790	Perindopril arginine	BRD-K92731339	perindopril	approved;	C09AA04;C09BA04;C09BB04;C09BX01;C09BX02;C10BX11;	This compound belongs to the class of organic compounds known as peptides. These are compounds containing an amide derived from two or more amino carboxylic acid molecules (the same or different) by formation of a covalent bond from the carbonyl carbon of one to the nitrogen atom of another.	For the treatment of mild to moderate essential hypertension, mild to moderate congestive heart failure, and to reduce the cardiovascular risk of individuals with hypertension or post-myocardial infarction and stable coronary disease.	107807	0.36772	0.36772
DB00634	Sulfacetamide sodium	BRD-K21520694	sulfacetamide	approved;	D10AF06;S01AB04;	This compound belongs to the class of organic compounds known as aminobenzenesulfonamides. These are organic compounds containing a benzenesulfonamide moiety with an amine group attached to the benzene ring.	For the treatment of bacterial vaginitis, keratitis, acute conjunctivitis, and blepharitis.	5320	0.3676	0.03484
DB00177	Valsartan	BRD-K45158365	valsartan	approved;investigational;	C09CA03;C09DA03;C09DB01;C09DB08;C09DX01;C09DX02;C09DX04;C10BX10;	Valsartan is an angiotensin-receptor blocker (ARB) that may be used to treat a variety of cardiac conditions including hypertension, diabetic nephropathy and heart failure. Valsartan lowers blood pressure by antagonizing the renin-angiotensin-aldosterone system (RAAS); it competes with angiotensin II for binding to the type-1 angiotensin II receptor (AT1) subtype and prevents the blood pressure i…	May be used as a first line agent to treat uncomplicated hypertension, isolated systolic hypertension and left ventricular hypertrophy. May be used as a first line agent to delay progression of diabetic nephropathy. Losartan may be also used as a second line agent in the treatment of congestive heart failure, systolic dysfunction, myocardial infarction and coronary artery disease in those intoler…	60846	0.366625	0.0131475
DB01175	Escitalopram	BRD-K70301876	escitalopram	approved;investigational;	N06AB10;	Escitalopram, the &lt;i&gt;S&lt;/i&gt;-enantiomer of citalopram, belongs to a class of antidepressant agents known as selective serotonin-reuptake inhibitors (SSRIs). Despite distinct structural differences between compounds in this class, SSRIs possess similar pharmacological activity. As with other antidepressant agents, several weeks of therapy may be required before a clinical effect is seen.…	Labeled indications include major depressive disorder (MDD) and generalized anxiety disorder (GAD). Unlabeled indications include treatment of mild dementia-associated agitation in nonpsychotic patients.	146570	0.365425	0.17671
DB01605	Pivmecillinam	BRD-K67100011	pivmecillinam	approved;	J01CA08;	Pivmecillinam is a mecillinam prodrug, a pivaloyloxymethyl ester of amdinocillin that is well absorbed orally, but broken down to amdinocillin in the intestinal mucosa. It is active against gram-negative organisms and used as for amdinocillin. [PubChem]	Used to treat infections due to mecillinam-sensitive organisms such as urinary tract infections, salmonellosis and typhoid fever.	115163	0.365115	0.365115
DB00423	Methocarbamol	BRD-A31521121	methocarbamol	approved;vet_approved;	M03BA03;M03BA53;M03BA73;	A centrally acting muscle relaxant whose mode of action has not been established. It is used as an adjunct in the symptomatic treatment of musculoskeletal conditions associated with painful muscle spasm. (From Martindale, The Extra Pharmacopoeia, 30th ed, p1206)	For use as an adjunct to rest, physical therapy, and other measures for the relief of discomforts associated with acute, painful musculoskeletal conditions.	4107	0.36503	0.0107
DB00503	Ritonavir	BRD-K51485625	ritonavir	approved;investigational;	J05AE03;J05AR10;J05AX66;J05AX67;	An HIV protease inhibitor that works by interfering with the reproductive cycle of HIV. [PubChem]	Indicated in combination with other antiretroviral agents for the treatment of HIV-infection.	392622	0.36454	0.213028
DB01047	Fluocinonide	BRD-K57886322	fluocinonide	approved;investigational;	C05AA11;D07AC08;D07CC05;	A topical glucocorticoid used in the treatment of eczema. [PubChem]	A topical anti-inflammatory product for the relief of the inflammatory and pruritic manifestations of corticosteroid-responsive dermatoses.	9642	0.36446	0.206605
DB00410	Mupirocin calcium	BRD-K15262564	mupirocin	approved;investigational;vet_approved;	D06AX09;R01AX06;	This compound belongs to the class of organic compounds known as medium-chain fatty acids. These are fatty acids with an aliphatic tail that contains between 4 and 12 carbon atoms.	For the treatment of &lt;i&gt;Staphylococci&lt;/i&gt; nasal carriers.	446596	0.36397	0.180165
DB01611	Hydroxychloroquine sulfate	BRD-A99117172	hydroxychloroquine	approved;	P01BA02;	This compound belongs to the class of organic compounds known as aminoquinolines and derivatives. These are organic compounds containing an amino group attached to a quinoline ring system.	For the suppressive treatment and treatment of acute attacks of malaria due to &lt;i&gt;Plasmodium vivax&lt;/i&gt;, &lt;i&gt;P. malariae&lt;/i&gt;, &lt;i&gt;P. ovale&lt;/i&gt;, and susceptible strains of &lt;i&gt;P. falciparum&lt;/i&gt;. It is also indicated for the treatment of discoid and systemic lupus erythematosus, and rheumatoid arthritis.	3652	0.362045	0.200692
DB00710	Ibandronate sodium	BRD-K08681769	ibandronic-acid	approved;investigational;	M05BA06;	This compound belongs to the class of organic compounds known as bisphosphonates. These are organic compounds containing two phosphonate groups linked together through a carbon atoms.	For the treatment and prevention of osteoporosis in postmenopausal women.	60852	0.36069	0.34439
DB04743	Nimesulide	BRD-K76775527	nimesulide	approved;withdrawn;	M01AX17;M02AA26;	Nimesulide is a relatively COX-2 selective, non-steroidal anti-inflammatory drug (NSAID) with analgesic and antipyretic properties. Its approved indications are the treatment of acute pain, the symptomatic treatment of osteoarthritis and primary dysmenorrhoea in adolescents and adults above 12 years old. Due to concerns about the risk of hepatotoxicity, nimesulide has been withdrawn from market i…	For the treatment of acute pain, the symptomatic treatment of osteoarthritis and primary dysmenorrhoea in adolescents and adults above 12 years old.	4495	0.358825	0.184468
DB00194	Vidarabine	BRD-K72093121	vidarabine	approved;	J05AB03;S01AD06;	A nucleoside antibiotic isolated from Streptomyces antibioticus. It has some antineoplastic properties and has broad spectrum activity against DNA viruses in cell cultures and significant antiviral activity against infections caused by a variety of viruses such as the herpes viruses, the vaccinia VIRUS and varicella zoster virus. [PubChem]	For treatment of chickenpox - varicella, herpes zoster and herpes simplex	21704	0.358255	0.153973
DB00243	Ranolazine hydrochloride	BRD-A97674275	ranolazine	approved;investigational;	C01EB18;	This compound belongs to the class of organic compounds known as alpha amino acid amides. These are amide derivatives of alpha amino acids.	For the treatment of chronic angina. It should be used in combination with amlodipine, beta-blockers or nitrates.	56959	0.357325	0.255105
DB01600	Tiaprofenic acid	BRD-A72988804	tiaprofenic-acid	approved;	M01AE11;	Tiaprofenic acid is a non-steroidal anti-inflammatory drug of the arylpropionic acid (profen) class, used to treat pain, especially arthritic pain.	Tiaprofenic acid is used to treat pain, especially arthritic pain.	5468	0.35679	0.162257
DB00245	Benzatropine mesylate	BRD-K68804560	benzatropine	approved;	N04AC01;	This compound belongs to the class of organic compounds known as diphenylmethanes. These are compounds containing a diphenylmethane moiety, which consists of a methane wherein two hydrogen atoms are replaced by two phenyl groups.	For use as an adjunct in the therapy of all forms of parkinsonism and also for use in the control of extrapyramidal disorders due to neuroleptic drugs.	1201549	0.354885	0.00137
DB06817	Raltegravir potassium	BRD-K05658747	raltegravir	approved;	J05AR16;J05AX08;	This compound belongs to the class of organic compounds known as pyrimidinecarboxylic acids and derivatives. These are compounds containing a pyrimidine ring which bears a carboxylic acid group (or a derivative thereof).	For the treatment of HIV-1 infection in conjunction with other antiretrovirals.	54671008	0.353405	0.18958
DB00819	Acetazolamide Sodium	BRD-K43457670	acetazolamide	approved;vet_approved;	S01EC01;	This compound belongs to the class of organic compounds known as n-arylamides. These are organic compounds that contain a carboxamide group that is N-linked to a aryl group. They have the generic structure RC(=O)N(R')H, R = organyl group and R'= aryl group.	For adjunctive treatment of: edema due to congestive heart failure; drug-induced edema; centrencephalic epilepsies; chronic simple (open-angle) glaucoma	1986	0.352975	0.211083
DB01137	Levofloxacin hemihydrate	BRD-K09471561	levofloxacin	approved;investigational;	A02BD10;J01MA12;J01RA05;S01AE05;	This compound belongs to the class of organic compounds known as quinoline carboxylic acids. These are quinolines in which the quinoline ring system is substituted by a carboxyl group at one or more positions.	For the treatment of bacterial conjunctivitis caused by susceptible strains of the following organisms: &lt;i&gt;Corynebacterium&lt;/i&gt; species, &lt;i&gt;Staphylococus aureus&lt;/i&gt;, &lt;i&gt;Staphylococcus epidermidis&lt;/i&gt;, &lt;i&gt;Streptococcus pneumoniae&lt;/i&gt;, &lt;i&gt;Streptococcus&lt;/i&gt; (Groups C/F/G), Viridans group streptococci, &lt;i&gt;Acinetobacter lwoffii&lt;/i&gt;…	149096	0.352405	0.188645
DB09026	Aliskiren hemifumarate	BRD-K30020243	aliskiren	approved;investigational;	C09DX02;C09XA02;C09XA52;C09XA53;C09XA54;	This compound belongs to the class of organic compounds known as delta amino acids and derivatives. These are compounds containing a carboxylic acid group and an amino group at the C5 carbon atom.	For the treatment of hypertension, to lower blood pressure.	5493444	0.351825	0.351825
DB01050	Ibuprofen lysine	BRD-A17655518	ibuprofen	approved;	C01EB16;G02CC01;M01AE01;M01AE51;M02AA13;R02AX02;	This compound belongs to the class of organic compounds known as phenylpropanoic acids. These are compounds with a structure containing a benzene ring conjugated to a propanoic acid.		3672	0.35015	0.193873
DB00543	Amoxapine	BRD-K02265150	amoxapine	approved;	N06AA17;	Amoxapine, the &lt;i&gt;N&lt;/i&gt;-demethylated derivative of the antipsychotic agent loxapine, is a dibenzoxazepine-derivative tricyclic antidepressant (TCA). TCAs are structurally similar to phenothiazines. They contain a tricyclic ring system with an alkyl amine substituent on the central ring. In non-depressed individuals, amoxapine does not affect mood or arousal, but may cause sedation. In…	For the relief of symptoms of depression in patients with neurotic or reactive depressive disorders as well as endogenous and psychotic depressions. May also be used to treat depression accompanied by anxiety or agitation.	2170	0.343915	0.166947
DB00473	Hexylcaine hydrochloride	BRD-A97730597	hexylcaine	approved;withdrawn;		This compound belongs to the class of organic compounds known as benzoic acid esters. These are ester derivatives of benzoic acid.	Used as a local anesthetic for surface application, infiltration or nerve block	10770	0.34371	0.152495
DB00285	Venlafaxine Hydrochloride	BRD-A51714012	venlafaxine	approved;	N06AX16;	This compound belongs to the class of organic compounds known as phenylpropylamines. These are compounds containing a phenylpropylamine moiety, which consists of a phenyl group substituted at the third carbon by an propan-1-amine.	For the management of major depressive disorder (MDD), generalized anxiety disorder (GAD), social anxiety disorder (social phobia), panic disorder with or without agoraphobia, vasomotor symptoms in women with breast cancer and in postmenopausal women, and neuropathic pain.	5656	0.341375	0.32327
DB00588	Fluticasone Propionate	BRD-K62310379	fluticasone	approved;	D07AC17;R01AD08;R01AD58;R03AK06;R03AK11;R03BA05;	Fluticasone propionate, a medium-potency synthetic corticosteroid, is used topically to relieve inflammatory and pruritic symptoms of dermatoses and psoriasis, intranasally to manage symptoms of allergic and non-allergic rhinitis, and orally for the treatment of asthma. Fluticasone proprionate is marketed under several different brand names such as Flonase?. Fluticasone propionate is also availab…	Fluticasone propionate, a medium-potency synthetic corticosteroid, is used topically to relieve inflammatory and pruritic symptoms of dermatoses and psoriasis, intranasally to manage symptoms of allergic and non-allergic rhinitis, and orally for the maintenance treatment of asthma as prophylactic therapy and for patients requiring oral corticosteroid therapy for asthma.	444036	0.340165	0.15387
DB00594	Amiloride hydrochloride	BRD-K97181089	amiloride	approved;	C03DB01;	This compound belongs to the class of organic compounds known as pyrazinecarboxamides. These are compounds containing a pyrazine ring which bears a carboxamide.	For use as adjunctive treatment with thiazide diuretics or other kaliuretic-diuretic agents in congestive heart failure or hypertension.	16231	0.339375	0.330437
DB00501	Cimetidine Hydrochloride	BRD-K34157611	cimetidine	approved;	A02BA01;A02BA51;	This compound belongs to the class of organic compounds known as imidazoles. These are compounds containing an imidazole ring, which is an aromatic five-member ring with two nitrogen atoms at positions 1 and 3, and three carbon atoms.	For the treatment and the management of acid-reflux disorders (GERD), peptic ulcer disease, heartburn, and acid indigestion.	2756	0.339265	0.160057
DB00833	Cefaclor monohydrate	BRD-K20338176	cefaclor	approved;	J01DC04;	This compound belongs to the class of organic compounds known as cephalosporins. These are compounds containing a 1,2-thiazine fused to a 2-azetidinone to for a oxo-5-thia-1-azabicyclo[4.2.0]oct-2-ene-2-carboxylic acid moiety or a derivative thereof.	For the treatment of certain infections caused by bacteria such as pneumonia and ear, lung, skin, throat, and urinary tract infections.	51039	0.337375	0.156443
DB01142	Doxepin Hydrochloride	BRD-K37694030	doxepin	approved;	N06AA12;	This compound belongs to the class of organic compounds known as dibenzoxepines. These are compounds containing a dibenzoxepine moiety, which consists of two benzene connected by an oxazepine ring.	Doxepin is used for the treatment of depression and/or anxiety. It can also be used for chronic urticaria and in the management of pain.	667468	0.33551	0.18311
DB00654	Latanoprost	BRD-K10961822	latanoprost	approved;investigational;	S01EE01;	endoplasmic reticulum organization	For the reduction of elevated intraocular pressure in patients with open-angle glaucoma or ocular hypertension.	5311221	0.333785	0.142605
DB00367	Levonorgestrel	BRD-K35189033	levonorgestrel	approved;investigational;	G03AA07;G03AB03;G03AC03;G03AD01;G03FA11;G03FB09;	A synthetic progestational hormone with actions similar to those of progesterone and about twice as potent as its racemic or (+-)-isomer (norgestrel). It is used for contraception, control of menstrual disorders, and treatment of endometriosis. It is usually supplied in a racemic mixture (Norgestrel, 6533-00-2). Only the levonorgestrel isomer is active. Levonorgestrel is marketed mostly as a comb…	For the treatment of menopausal and postmenopausal disorders and alone or in combination with other hormones as an oral contraceptive.	13109	0.33256	0.125075
DB00674	Galantamine hydrobromide	BRD-K49481516	galantamine	approved;	N06DA04;	This compound belongs to the class of organic compounds known as galanthamine-type amaryllidaceae alkaloids. These are amaryllidaceae alkaloids with a structure characterized a tetracyclic skeleton with two ortho aromatic protons in ring A.	For the treatment of mild to moderate dementia of the Alzheimer's type. Has also been investigated in patients with mild cognitive impairment who did not meet the diagnostic criteria for Alzheimer's disease.	9651	0.329705	0.17934
DB00299	Penciclovir sodium	BRD-K47780086	penciclovir	approved;	D06BB06;J05AB13;	This compound belongs to the class of organic compounds known as hypoxanthines. These are compounds containing the purine derivative 1H-purin-6(9H)-one. Purine is a bicyclic aromatic compound made up of a pyrimidine ring fused to an imidazole ring.	Used to treat recurrent cold sores on the lips and face from various herpesvirus invections.	4725	0.325945	0.13891
DB01628	Etoricoxib	BRD-K54770957	etoricoxib	approved;investigational;	M01AH05;	Etoricoxib is a new COX-2 selective inhibitor. Current therapeutic indications are: treatment of rheumatoid arthritis, osteoarthritis, ankylosing spondylitis, chronic low back pain, acute pain and gout. Like any other COX-2 selective inhibitor, Etoricoxib selectively inhibits isoform 2 of cyclo-oxigenase enzyme (COX-2). This reduces the generation of prostaglandins (PGs) from arachidonic acid.	For the treatment of rheumatoid arthritis, osteoarthritis, ankylosing spondylitis, chronic low back pain, acute pain and gout.	123619	0.32096	0.15141
DB01032	Probenecid	BRD-K95237249	probenecid	approved;	M04AB01;	The prototypical uricosuric agent. It inhibits the renal excretion of organic anions and reduces tubular reabsorption of urate. Probenecid has also been used to treat patients with renal impairment, and, because it reduces the renal tubular excretion of other drugs, has been used as an adjunct to antibacterial therapy. [PubChem]	For the reduction of serum uric acid concentrations in chronic gouty arthritis and tophaceous gout in patients with frequent disabling gout attacks. Has also been effectively used to promote uric acid excretion in hyperuricemia secondary to the administration of thiazide and related diuretics.	4911	0.31841	0.11321
DB08604	Triclosan	BRD-K41731458	triclosan	approved;	D08AE04;D09AA06;	An aromatic ether that is phenol which is substituted at C-5 by a chloro group and at C-2 by a 2,4-dichlorophenoxy group. It is widely used as a preservative and antimicrobial agent in personal care products such as soaps, skin creams, toothpaste and deodorants as well as in household items such as plastic chopping boards, sports equipment and shoes. [ChEBI]	Triclosan is used in a variety of common household products, including soaps, mouthwashes, dish detergents, toothpastes, deodorants, and hand sanitizers. It is also used in health care settings in surgical scrubs and personnel hand washes.	5564	0.317655	0.152097
DB00478	Rimantadine Hydrochloride	BRD-A84282119	rimantadine	approved;	J05AC02;	This compound belongs to the class of organic compounds known as monoalkylamines. These are organic compounds containing an primary aliphatic amine group.	For the prophylaxis and treatment of illness caused by various strains of influenza A virus in adults.	5071	0.31555	0.174585
DB01065	Melatonin	BRD-K97530723	melatonin	approved;nutraceutical;vet_approved;	N05CH01;	Melatonin is a biogenic amine that is found in animals, plants and microbes. Aaron B. Lerner of Yale University is credited for naming the hormone and for defining its chemical structure in 1958. In mammals, melatonin is produced by the pineal gland. The pineal gland is small endocrine gland, about the size of a rice grain and shaped like a pine cone (hence the name), that is located in the cente…	Used orally for jet lag, insomnia, shift-work disorder, circadian rhythm disorders in the blind (evidence for efficacy), and benzodiazepine and nicotine withdrawal. Evidence indicates that melatonin is likely effective for treating circadian rhythm sleep disorders in blind children and adults. It has received FDA orphan drug status as an oral medication for this use. A number of studies have show…	896	0.314265	0.099515
DB00500	Tolmetin sodium	BRD-K82562631	tolmetin	approved;	M01AB03;M02AA21;	This compound belongs to the class of organic compounds known as acetophenones. These are organic compounds containing the acetophenone structure.	For the relief of signs and symptoms of rheumatoid arthritis and osteoarthritis, including the treatment of acute flares long-term management. Also for treatment of juvenile rheumatoid arthritis.	5509	0.31023	0.102447
DB01211	Clarithromycin	BRD-K49668410	clarithromycin	approved;	A02BD04;A02BD05;A02BD06;A02BD07;A02BD09;A02BD11;J01FA09;	Clarithromycin, a semisynthetic macrolide antibiotic derived from erythromycin, inhibits bacterial protein synthesis by binding to the bacterial 50S ribosomal subunit. Binding inhibits peptidyl transferase activity and interferes with amino acid translocation during the translation and protein assembly process. Clarithromycin may be bacteriostatic or bactericidal depending on the organism and dru…	An alternative medication for the treatment of acute otitis media caused by &lt;i&gt;H. influenzae, M. catarrhalis, or S. pneumoniae&lt;/i&gt; in patients with a history of type I penicillin hypersensitivity. Also for the treatment of pharyngitis and tonsillitis caused by susceptible &lt;i&gt;Streptococcus pyogenes&lt;/i&gt;, as well as respiratory tract infections including acute maxillary sinus…	84029	0.30972	0.139432
DB00241	Butalbital	BRD-K71350836	butalbital	approved;illicit;		Butalbital, 5-allyl-5-isobutylbarbituric acid, is a barbiturate with an intermediate duration of action. It has the same chemical formula as talbutal but a different structure. Butalbital is often combined with other medications, such as acetaminophen or aspirin, and is commonly prescribed for the treatment of pain and headache. [Wikipedia]	Used in combination with acetaminophen or aspirin and caffeine for its sedative and relaxant effects in the treatment of tension headaches, migraines, and pain.	2481	0.30657	0.103972
DB01297	Practolol	BRD-A41304429	practolol	approved;	C07AB01;	A beta-adrenergic antagonist that has been used in the emergency treatment of cardiac arrhythmias. [PubChem]	Used in the emergency treatment of cardiac arrhythmias.	4883	0.302885	0.120267
DB00549	Zafirlukast	BRD-K71289571	zafirlukast	approved;investigational;	R03DC01;	nucleic acid phosphodiester bond hydrolysis	For the prophylaxis and chronic treatment of asthma.	5717	0.302	0.149688
DB00975	Dipyridamole	BRD-K86301799	dipyridamole	approved;	B01AC07;	A phosphodiesterase inhibitor that blocks uptake and metabolism of adenosine by erythrocytes and vascular endothelial cells. Dipyridamole also potentiates the antiaggregating action of prostacyclin. (From AMA Drug Evaluations Annual, 1994, p752)	For as an adjunct to coumarin anticoagulants in the prevention of postoperative thromboembolic complications of cardiac valve replacement and also used in prevention of angina.	3108	0.289985	0.136283
DB00496	Darifenacin Hydrobromide	BRD-K95773607	darifenacin	approved;investigational;	G04BD10;	This compound belongs to the class of organic compounds known as diphenylmethanes. These are compounds containing a diphenylmethane moiety, which consists of a methane wherein two hydrogen atoms are replaced by two phenyl groups.	For the treatment of overactive bladder with symptoms of urge urinary incontinence, urgency and frequency.	444031	0.28767	0.10268
DB00207	Azithromycin dihydrate	BRD-K74501079	azithromycin	approved;	J01FA10;J01RA07;S01AA26;	This compound belongs to the class of organic compounds known as macrolides and analogues. These are organic compounds containing a lactone ring of at least twelve members.	For the treatment of patients with mild to moderate infections caused by susceptible strains of the designated microorganisms in the specific conditions: &lt;i&gt;H. influenzae&lt;/i&gt;, &lt;i&gt;M. catarrhalis&lt;/i&gt;, &lt;i&gt;S. pneumoniae&lt;/i&gt;, &lt;i&gt;C. pneumoniae&lt;/i&gt;, &lt;i&gt;M. pneumoniae&lt;/i&gt;, &lt;i&gt;S. pyogenes&lt;/i&gt;, &lt;i&gt;S. aureus&lt;/i&gt;, &lt;i&gt;S. …	447043	0.136995	0.063585
DB01199	Tubocurarine chloride pentahydrate	BRD-K99621550	tubocurarine	approved;	M03AA02;	This compound belongs to the class of organic compounds known as benzylisoquinolines. These are organic compounds containing an isoquinoline to which a benzyl group is attached.	Used as a diagnosis agent for myasthenia gravis, and also to facilitate the intubation after induction of anesthesia in surgical procedure	6000	0.13473	0.13473
DB01261	Sitagliptin	BRD-K19416115	sitagliptin	approved;investigational;	A10BD07;A10BD12;A10BH01;A10BH51;	Sitagliptin is a new oral hypoglycemic (anti-diabetic drug) of the new dipeptidyl peptidase-4 (DPP-4) inhibitor class of drugs. This enzyme-inhibiting drug is to be used either alone or in combination with metformin or a thiazolidinedione for control of type 2 diabetes mellitus. The drug works to competitively inhibit a protein/enzyme, dipeptidyl peptidase 4 (DPP-4), that results in an increased …	For use as an adjunct to diet and exercise to improve glycemic control in patients with type 2 diabetes mellitus. Also for use in patients with type 2 diabetes mellitus to improve glycemic control in combination with metformin or a PPARγ agonist (e.g., thiazolidinediones) when the single agent alone, with diet and exercise, does not provide adequate glycemic control.	4369359	0.086685	0.029655
DB00502	Haloperidol decanoate	BRD-K67783091	haloperidol	approved;	N05AD01;	This compound belongs to the class of organic compounds known as phenylpiperidines. These are compounds containing a phenylpiperidine skeleton, which consists of a piperidine bound to a phenyl group.	For the management of psychotic disorders (eg. schizophrenia) and delirium, as well as to control tics and vocal utterances of Tourette's syndrome (Gilles de la Tourette's syndrome). Also used for the treatment of severe behavioural problems in children with disrubtive behaviour disorder or ADHD (attention-deficit hyperactivity disorder). Haloperidol has been used in the prevention and control of…	3559	0.08318	0.0635975
DB00281	Lidocaine hydrochloride	BRD-K52662033	lidocaine	approved;vet_approved;	C01BB01;C05AD01;D04AB01;N01BB02;N01BB52;R02AD02;S01HA07;S02DA01;	This compound belongs to the class of organic compounds known as alpha amino acid amides. These are amide derivatives of alpha amino acids.	For production of local or regional anesthesia by infiltration techniques such as percutaneous injection and intravenous regional anesthesia by peripheral nerve block techniques such as brachial plexus and intercostal and by central neural techniques such as lumbar and caudal epidural blocks.	3676	0.080645	0.050255
DB00694	Daunorubicin citrate	BRD-K43389675	daunorubicin	approved;	L01DB02;	This compound belongs to the class of organic compounds known as anthracyclines. These are polyketides containing a tetracenequinone?ring structure with a sugar attached by glycosidic linkage.	For remission induction in acute nonlymphocytic leukemia (myelogenous, monocytic, erythroid) of adults and for remission induction in acute lymphocytic leukemia of children and adults.	30323	0.06465	0.06465
DB00482	Celecoxib	BRD-K02637541	celecoxib	approved;investigational;	L01XX33;M01AH01;	Celecoxib is a non-steroidal anti-inflammatory drug (NSAID) used in the treatment of osteoarthritis, rheumatoid arthritis, acute pain, painful menstruation and menstrual symptoms, and to reduce numbers of colon and rectum polyps in patients with familial adenomatous polyposis. It is marketed by Pfizer under the brand name Celebrex. In some countries, it is branded Celebra. Celecoxib is available …	For relief and management of osteoarthritis (OA), rheumatoid arthritis (RA), juvenile rheumatoid arthritis (JRA), ankylosing spondylitis, acute pain, primary dysmenorrhea and oral adjunct to usual care for patients with familial adenomatous polyposis	2662	0.05967	0.052445
DB01097	Leflunomide	BRD-K78692225	leflunomide	approved;investigational;	L04AA13;	Leflunomide is a pyrimidine synthesis inhibitor belonging to the DMARD (disease-modifying antirheumatic drug) class of drugs, which are chemically and pharmacologically very heterogeneous. Leflunomide was approved by FDA and in many other countries (e.g., Canada, Europe) in 1999.	For the management of the signs and symptoms of active rheumatoid arthritis (RA) to improve physical function and to slow the progression of structural damage associated with the disease. Has also been used for the prevention of acute and chronic rejection in recipients of solid organ trasnplants and is designated by the FDA as an orphan drug for this use.	3899	0.059595	0.0298075
DB01009	Ketoprofen	BRD-A97739905	ketoprofen	approved;vet_approved;	M01AE03;M01AE53;M02AA10;	Ketoprofen, a propionic acid derivative, is a nonsteroidal anti-inflammatory agent (NSAIA) with analgesic and antipyretic properties.	For symptomatic treatment of acute and chronic rheumatoid arthritis, osteoarthritis, ankylosing spondylitis, primary dysmenorrhea and mild to moderate pain associated with musculotendinous trauma (sprains and strains), postoperative (including dental surgery) or postpartum pain.	3825	0.059425	0.049875
DB06710	Methyltestosterone	BRD-K84036904	testosterone	approved;	G03BA02;G03EA01;G03EK01;	A synthetic anabolic steroid used for treating men with testosterone deficiency or similar androgen replacement therapies. Also, has antineoplastic properties and so has been used secondarily in women with advanced breast cancer. Methyltestosterone is a schedule III drug in the US.	Methyltestosterone is an anabolic steroid hormone used to treat men with a testosterone deficiency. It is also used in women to treat breast cancer, breast pain, swelling due to pregnancy, and with the addition of estrogen it can treat symptoms of menopause.	6010	0.057415	0.021855
DB01357	Mestranol	BRD-K31920458	mestranol	approved;		The 3-methyl ether of ethinyl estradiol. It must be demethylated to be biologically active. It is used as the estrogen component of many combination ORAL contraceptives. [PubChem]	Mestranol was used as one of the first oral contraceptives.	6291	0.05667	0.042025
DB01006	Letrozole	BRD-K88789588	letrozole	approved;investigational;	L02BG04;	alkaloid metabolic process	For the extended adjuvant treatment of early breast cancer in postmenopausal women who have received 5 years of adjuvant tamoxifen therapy. Also for first-line treatment of postmenopausal women with hormone receptor positive or hormone receptor unknown locally advanced or metastatic breast cancer. Also indicated for the treatment of advanced breast cancer in postmenopausal women with disease prog…	3902	0.056545	0.0097175
DB01205	Flumazenil	BRD-K98769987	flumazenil	approved;	V03AB25;	Fumazenil is an imidazobenzodiazepine derivative and a potent benzodiazepine receptor antagonist that competitively inhibits the activity at the benzodiazepine recognition site on the GABA/benzodiazepine receptor complex, thereby reversing the effects of benzodiazepine on the central nervous system.	For the complete or partial reversal of the sedative effects of benzodiazepines in cases where general anesthesia has been induced and/or maintained with benzodiazepines, and where sedation has been produced with benzodiazepines for diagnostic and therapeutic procedures. Also for the management of benzodiazepine overdose as an adjunct for appropriate supportive and symptomatic measures.	3373	0.054245	0.019975
DB01001	Levalbuterol hydrochloride	BRD-A88254928	salbutamol	approved;vet_approved;	R03AC02;R03AK04;R03AL02;R03CC02;	This compound belongs to the class of organic compounds known as benzyl alcohols. These are organic compounds containing the phenylmethanol substructure.	For symptomatic relief and prevention of bronchospasm due to bronchial asthma, chronic bronchitis, and other chronic bronchopulmonary disorders such as COPD.	2083	0.05409	0.0131675
DB05266	Ibudilast	BRD-K16444452	ibudilast	approved;investigational;	R03DC04;	Ibudilast is an anti-inflammatory and neuroprotective oral agent which shows an excellent safety profile at 60 mg/day and provides significantly prolonged time-to-first relapse and attenuated brain volume shrinkage in patients with relapsing-remitting (RR) and/or secondary progressive (SP) multiple sclerosis (MS). Ibudilast is currently in development in the U.S. (codes: AV-411 or MN-166), but is…	For the treatment of multiple sclerosis, asthma, and cerebrovascular disease.	3671	0.052245	0.04344
DB01171	Moclobemide	BRD-K07237224	moclobemide	approved;	N06AG02;	A reversible monoamine oxidase inhibitor (MAOI) selective for isoform A (RIMA) used to treat major depressive disorder.	For the treatment of depression.	4235	0.04832	0.0385
DB00208	Ticlopidine Hydrochloride	BRD-K00603606	ticlopidine	approved;	B01AC05;	This compound belongs to the class of organic compounds known as thienopyridines. These are heterocyclic compounds containing a thiophene ring fused to a pyridine ring. Thiophene is 5-membered ring consisting of four carbon atoms and one sulfur atom. Pyridine is a 6-membered ring consisting of five carbon atoms and one nitrogen center.		5472	0.029375	0.0050275
DB00977	Ethinyl Estradiol	BRD-K48195008	ethinylestradiol	approved;	G03AA01;G03AA02;G03AA03;G03AA04;G03AA05;G03AA06;G03AA07;G03AA08;G03AA09;G03AA10;G03AA11;G03AA12;G03AA13;G03AA15;G03AA16;G03AB01;G03AB02;G03AB03;G03AB04;G03AB05;G03AB06;G03AB07;G03CA01;L02AA03;	A semisynthetic alkylated estradiol with a 17-alpha-ethinyl substitution. It has high estrogenic potency when administered orally and is often used as the estrogenic component in oral contraceptives [PubChem]. Ethinyl estradiol is marketed mostly as a combination oral contraceptive under several brand names such as Alesse, Tri-Cyclen, Triphasil, and Yasmin. The FDA label includes a black box warn…	For treatment of moderate to severe vasomotor symptoms associated with the menopause, female hypogonadism, prostatic carcinoma-palliative therapy of advanced disease, breast cancer, as an oral contraceptive, and as emergency contraceptive.	5991	0.029355	0.0115925
DB00763	Methimazole	BRD-K54416256	methimazole	approved;	H03BB02;H03BB52;	A thioureylene antithyroid agent that inhibits the formation of thyroid hormones by interfering with the incorporation of iodine into tyrosyl residues of thyroglobulin. This is done by interfering with the oxidation of iodide ion and iodotyrosyl groups through inhibition of the peroxidase enzyme. [PubChem]	For the treatment of hyperthyroidism, goiter, Graves disease and psoriasis.	1349907	0.00755	0.0007325

## Sheet: 144h_all drugs
This table shows ES of all compounds compared with eIF4G1-silenced cells at 144 h after irradiation. The threshold of maximum ES is 0.49 and the threshold of average ES is 0.36.
Drugbank_id	Drug_name	Pert_id	Pert_name	Drug_group	ATC_code	Drug_description	Drug_indication	Pubchem_id	ES_maximum	ES_average
DB00001	Lepirudin	BRD-K10436544/BRD-K54343811/BRD-K85133207/BRD-K98109757/BRD-U88459701/BRD-K19826688/BRD-K01621458/BRD-K29313308/BRD-K03641750/BRD-K61894884/BRD-K29107232/BRD-K35832492/BRD-K26510616/CMAP-PRISM-TP7/CMAP-AZD-1152HQPA/BRD-U94846492/BRD-U19872303	BRD-K10436544/BRD-K54343811/HDAC1-selective/cyclopentene/atorvastatin/BRD-K19826688/BRD-K01621458/HDAC3-selective/FL-HDAC-025/BRD-K61894884/Broad-Sai-595/BRD-K35832492/BRD-K26510616/TP7/AZD-1152HQPA/quinine/spiramycin	approved;	B01AE02;	Lepirudin is identical to natural hirudin except for substitution of leucine for isoleucine at the N-terminal end of the molecule and the absence of a sulfate group on the tyrosine at position 63. It is produced via yeast cells. Bayer ceased the production of lepirudin (Refludan) effective May 31, 2012.	For the treatment of heparin-induced thrombocytopenia	NA	0.56487	0.246981
DB02375	Myricetin	BRD-K43149758	myricetin	experimental;		xylan catabolic process		5281672	0.498545	0.272847
DB00806	Pentoxifylline	BRD-K57569181	pentoxifylline	approved;investigational;	C04AD03;	A methylxanthine derivative that inhibits phosphodiesterase and affects blood rheology. It improves blood flow by increasing erythrocyte and leukocyte flexibility. It also inhibits platelet aggregation. Pentoxifylline modulates immunologic activity by stimulating cytokine production. [PubChem]	For the treatment of patients with intermittent lameness or immobility arising from chronic occlusive arterial disease of the limbs.	4740	0.49826	0.0669403
DB07101	N-{[(2R)-2,3-dihydroxypropyl]oxy}-3,4-difluoro-2-[(2-fluoro-4-iodophenyl)amino]benzamide	BRD-K49865102	PD-0325901	experimental;		innate immune response		9826528	0.49696	0.400636
DB00359	Sulfadiazine sodium	BRD-K32273377	sulfadiazine	approved;vet_approved;	J01EC02;J01EE02;J01EE06;	This compound belongs to the class of organic compounds known as aminobenzenesulfonamides. These are organic compounds containing a benzenesulfonamide moiety with an amine group attached to the benzene ring.	For the treatment of rheumatic fever and meningococcal meningitis	5215	0.48815	0.0142075
DB08911	Trametinib	BRD-K12343256	trametinib	approved;	L01XE25;	Trametinib dimethyl sulfoxide is a kinase inhibitor. Each 1-mg tablet contains 1.127 mg trametinib dimethyl sulfoxide equivalent to 1 mg of trametinib non-solvated parent. FDA approved on May 29, 2013.	Trametinib is indicated for the treatment of unresectable or metastatic melanoma with BRAF V600E or V600K mutations, as detected by an FDA-approved test.	11707110	0.488075	0.237884
DB07232	Veliparib	BRD-K87142802	veliparib	investigational;		extracellular matrix organization		11960529	0.48739	0.0265983
DB00425	Zolpidem tartrate	BRD-K44876623	zolpidem	approved;	N05CF02;	This compound belongs to the class of organic compounds known as phenylimidazoles. These are polycyclic aromatic compounds containing a benzene ring linked to an imidazole ring through a CC or CN bond.	For the short-term treatment of insomnia.	5732	0.482515	0.249257
DB00829	Diazepam	BRD-K16508793	diazepam	approved;illicit;vet_approved;	N05BA01;	A benzodiazepine with anticonvulsant, anxiolytic, sedative, muscle relaxant, and amnesic properties and a long duration of action. Its actions are mediated by enhancement of gamma-aminobutyric acid activity. It is used in the treatment of severe anxiety disorders, as a hypnotic in the short-term management of insomnia, as a sedative and premedicant, as an anticonvulsant, and in the management of …	Used in the treatment of severe anxiety disorders, as a hypnotic in the short-term management of insomnia, as a sedative and premedicant, as an anticonvulsant, and in the management of alcohol withdrawal syndrome.	3016	0.47934	0.271895
DB00170	Menadiol diphosphate	BRD-K78126613	menadione	approved;nutraceutical;	B02BA02;	This compound belongs to the class of organic compounds known as naphthoquinones. These are compounds containing a naphthohydroquinone moiety, which consists of a benzene ring linearly fused to a bezene-1,4-dione (quinone).	The primary known function of vitamin K is to assist in the normal clotting of blood, but it may also play a role in normal bone calcification.	4055	0.479	0.125243
DB02546	Vorinostat	BRD-K81418486	vorinostat	approved;investigational;	L01XX38;	Vorinostat (rINN) or suberoylanilide hydroxamic acid (SAHA), is a drug currently under investigation for the treatment of cutaneous T cell lymphoma (CTCL), a type of skin cancer, to be used when the disease persists, gets worse, or comes back during or after treatment with other medicines. It is the first in a new class of agents known as histone deacetylase inhibitors. A recent study suggested t…	For the treatment of cutaneous manifestations in patients with cutaneous T-cell lymphoma who have progressive, persistent or recurrent disease on or following two systemic therapies.	5311	0.47504	0.122015
DB01299	Sulfadoxine	BRD-K55250441	sulfadoxine	approved;		A long acting sulfonamide that is used, usually in combination with other drugs, for respiratory, urinary tract, and malarial infections. [PubChem]		17134	0.47452	0.238685
DB00588	Fluticasone Propionate	BRD-K62310379	fluticasone	approved;	D07AC17;R01AD08;R01AD58;R03AK06;R03AK11;R03BA05;	Fluticasone propionate, a medium-potency synthetic corticosteroid, is used topically to relieve inflammatory and pruritic symptoms of dermatoses and psoriasis, intranasally to manage symptoms of allergic and non-allergic rhinitis, and orally for the treatment of asthma. Fluticasone proprionate is marketed under several different brand names such as Flonase?. Fluticasone propionate is also availab…	Fluticasone propionate, a medium-potency synthetic corticosteroid, is used topically to relieve inflammatory and pruritic symptoms of dermatoses and psoriasis, intranasally to manage symptoms of allergic and non-allergic rhinitis, and orally for the maintenance treatment of asthma as prophylactic therapy and for patients requiring oral corticosteroid therapy for asthma.	444036	0.473385	0.0226675
DB01357	Mestranol	BRD-K31920458	mestranol	approved;		The 3-methyl ether of ethinyl estradiol. It must be demethylated to be biologically active. It is used as the estrogen component of many combination ORAL contraceptives. [PubChem]	Mestranol was used as one of the first oral contraceptives.	6291	0.469095	0.022505
DB00203	Sildenafil Citrate	BRD-K79759585/BRD-K50128260	sildenafil	approved;investigational;	G04BE03;	This compound belongs to the class of organic compounds known as benzenesulfonamides. These are organic compounds containing a sulfonamide group that is S-linked to a benzene ring.	For the treatment of erectile dysfunction and to relieve symptoms of pulmonary arterial hypertension (PAH).	5212	0.468115	0.153978
DB01254	Dasatinib monohydrate	BRD-K49328571	dasatinib	approved;investigational;	L01XE06;	This compound belongs to the class of organic compounds known as n-arylpiperazines. These are organic compounds containing a piperazine ring where the nitrogen ring atom carries an aryl group.	For the treatment of adults with chronic, accelerated, or myeloid or lymphoid blast phase chronic myeloid leukemia with resistance or intolerance to prior therapy. Also indicated for the treatment of adults with Philadelphia chromosome-positive acute lymphoblastic leukemia with resistance or intolerance to prior therapy.	3062316	0.46682	0.142799
DB07138	5-(2,6-dichlorophenyl)-2-[(2,4-difluorophenyl)sulfanyl]-6H-pyrimido[1,6-b]pyridazin-6-one	BRD-K91900765	VX-745	experimental;		organ regeneration		3038525	0.46648	0.0217831
DB06151	Acetylcysteine amide	BRD-K59058747	acetylcysteine	approved;	R05CB01;S01XA08;V03AB23;	This compound belongs to the class of organic compounds known as n-acyl-aliphatic-alpha amino acids. These are alpha amino acids carrying a N-acylated aliphatic chain.	Acetylcysteine is used mainly as a mucolytic and in the management of paracetamol (acetaminophen) overdose.	12035	0.46472	0.103389
DB00783	Estradiol acetate	BRD-K18910433	estradiol	approved;investigational;vet_approved;	G02BB01;G03AA14;G03AB08;G03CA03;G03CA53;G03EA01;G03EA02;G03EA03;G03FA01;G03FA02;G03FA03;G03FA04;G03FA05;G03FA06;G03FA07;G03FA08;G03FA09;G03FA10;G03FA11;G03FA12;G03FA13;G03FA14;G03FA15;G03FA16;G03FA17;G03FB01;G03FB02;G03FB03;G03FB04;G03FB05;G03FB06;G03FB07;G03FB08;G03FB09;G03FB10;G03FB11;G03FB12;G03HB01;	This compound belongs to the class of organic compounds known as estrogens and derivatives. These are steroids with a structure containing a 3-hydroxylated estrane.	For the treatment of urogenital symptoms associated with post-menopausal atrophy of the vagina (such as dryness, burning, pruritus and dyspareunia) and/or the lower urinary tract (urinary urgency and dysuria).	5757	0.463905	0.023771
DB07677	2-methyl-3,5,7,8-tetrahydro-4H-thiopyrano[4,3-d]pyrimidin-4-one	BRD-K94920105	DR-2313	experimental;		peptidyl-serine phosphorylation		10219702	0.46175	0.187256
DB00356	Chlorzoxazone	BRD-K98174813	chlorzoxazone	approved;	M03BB03;M03BB53;M03BB73;	A centrally acting central muscle relaxant with sedative properties. It is claimed to inhibit muscle spasm by exerting an effect primarily at the level of the spinal cord and subcortical areas of the brain. (From Martindale, The Extra Pharmacopoea, 30th ed, p1202)	For the relief of discomfort associated with acute painful musculoskeletal conditions.	2733	0.459765	0.0270825
DB09079	Nintedanib Esylate	BRD-K49075727	nintedanib	approved;	L01XE31;	This compound belongs to the class of organic compounds known as indolecarboxylic acids. These are compounds containing a carboxylic acid group linked to an indole.	Nintedanib is indicated for the treatment of idiopathic pulmonary fibrosis (IPF).	9809715	0.458665	0.103094
DB01782	2,6-Dihydroanthra/1,9-Cd/Pyrazol-6-One	BRD-K01567962	pyrazolanthrone	experimental;		substantia nigra development		8515	0.458005	0.189221
DB00760	Meropenem	BRD-K01612348	meropenem	approved;investigational;	J01DH02;	Meropenem is a broad-spectrum carbapenem antibiotic. It is active against Gram-positive and Gram-negative bacteria. Meropenem exerts its action by penetrating bacterial cells readily and interfering with the synthesis of vital cell wall components, which leads to cell death.	For use as single agent therapy for the treatment of the following infections when caused by susceptible isolates of the designated microorganisms: &lt;b&gt;complicated skin and skin structure infections&lt;/b&gt; due to &lt;i&gt;Staphylococcus aureus&lt;/i&gt; (b-lactamase and non-b-lactamase producing, methicillin-susceptible isolates only), &lt;i&gt;Streptococcus pyogenes&lt;/i&gt;, &lt;i&gt;S…	441130	0.45686	0.044195
DB01054	Nitrendipine	BRD-A12560204/BRD-A02006392	nitrendipine	approved;	C08CA08;C09BB06;	A calcium channel blocker with marked vasodilator action. It is an effective antihypertensive agent and differs from other calcium channel blockers in that it does not reduce glomerular filtration rate and is mildly natriuretic, rather than sodium retentive. [PubChem]	For the treatment of mild to moderate hypertension	4507	0.45646	0.0523337
DB00213	Pantoprazole Magnesium	BRD-A22380646	pantoprazole	approved;	A02BC02;A02BD04;A02BD11;	This compound belongs to the class of organic compounds known as sulfinylbenzimidazoles. These are polycyclic aromatic compounds containing a sulfinyl group attached at the position 2 of a benzimidazole moiety.	Short-term (up to 16 weeks) treatment of erosive esophagitis.	4679	0.454925	0.0020725
DB09073	Palbociclib Isethionate	BRD-K51313569	palbociclib	approved;	L01XE33;	This compound belongs to the class of organic compounds known as pyridinylpiperazines. These are compounds containing a pyridinylpiperazine skeleton, which consists of a pyridine linked (not fused) to a piperazine by a bond by a single bond that is not part of a ring.	Palbociclib is indicated in combination with letrozole for the treatment of postmenopausal women with estrogen receptor (ER)-positive, human epidermal growth factor receptor 2 (HER2)-negative advanced breast cancer as initial endocrine-based therapy for their metastatic disease. This indication is approved under accelerated approval based on progression-free survival (PFS). Continued approval for…	5330286	0.45279	0.0702275
DB00415	Ampicillin sodium	BRD-K68432770	ampicillin	approved;vet_approved;	J01CA01;J01CA51;J01CR01;S01AA19;	This compound belongs to the class of organic compounds known as penicillins. These are organic compounds containing the penicillin core structure, which is structurally characterized by a penam ring bearing two methyl groups at position 2, and an amide group at position 6 [starting from the sulfur atom at position 1].	For treatment of infection (Respiratory, GI, UTI and meningitis) due to E. coli, P. mirabilis, enterococci, Shigella, S. typhosa and other Salmonella, nonpenicillinase-producing N. gononhoeae, H. influenzae, staphylococci, streptococci including streptoc	6249	0.45062	0.03034
DB00285	Venlafaxine Hydrochloride	BRD-A51714012	venlafaxine	approved;	N06AX16;	This compound belongs to the class of organic compounds known as phenylpropylamines. These are compounds containing a phenylpropylamine moiety, which consists of a phenyl group substituted at the third carbon by an propan-1-amine.	For the management of major depressive disorder (MDD), generalized anxiety disorder (GAD), social anxiety disorder (social phobia), panic disorder with or without agoraphobia, vasomotor symptoms in women with breast cancer and in postmenopausal women, and neuropathic pain.	5656	0.449125	0.037255
DB08584	6-{[6-(1-methyl-1H-pyrazol-4-yl)[1,2,4]triazolo[4,3-b]pyridazin-3-yl]sulfanyl}quinoline	BRD-K19477839	SGX523	experimental;		peptidyl-tyrosine phosphorylation		24779724	0.4463	0.293377
DB00336	Nitrofural	BRD-K53815609/BRD-K79092138	nitrofural	approved;vet_approved;	B05CA03;D08AF01;D09AA03;P01CC02;S01AX04;S02AA02;	A topical anti-infective agent effective against gram-negative and gram-positive bacteria. It is used for superficial wounds, burns, ulcers, and skin infections. Nitrofurazone has also been administered orally in the treatment of trypanosomiasis. [PubChem]	For the treatement of bacterial skin infections including pyodermas, infected dermatoses and infections of cuts, wounds, burns and ulcers due to susceptible organisms.	5447130	0.443385	0.148998
DB00776	Oxcarbazepine	BRD-K04196797	oxcarbazepine	approved;	N03AF02;	Oxcarbazepine is structurally a derivative of carbamazepine, adding an extra oxygen atom to the benzylcarboxamide group. This difference helps reduce the impact on the liver of metabolizing the drug, and also prevents the serious forms of anemia occasionally associated with carbamazepine. Aside from this reduction in side effects, it is thought to have the same mechanism as carbamazepine - sodium…	For use as monotherapy or adjunctive therapy in the treatment of partial seizures in adults with epilepsy and as adjunctive therapy in the treatment of partial seizures in children ages 4-16 with epilepsy.	34312	0.443125	0.242787
DB08183	3-{(3R,4R)-4-methyl-3-[methyl(7H-pyrrolo[2,3-d]pyrimidin-4-yl)amino]piperidin-1-yl}-3-oxopropanenitrile	BRD-K31283835	tofacitinib	experimental;		organ regeneration		9926791	0.44295	0.206122
DB07697	1-(2,3-dihydro-1,4-benzodioxin-6-ylsulfonyl)-4-[(4-methoxyphenyl)sulfonyl]piperazine	BRD-K44241590	ASN-05257430	experimental;		cellular component disassembly involved in execution phase of apoptosis		650361	0.44228	0.0421212
DB08916	Afatinib Dimaleate	BRD-K66175015	afatinib	approved;	L01XE13;	This compound belongs to the class of organic compounds known as quinazolinamines. These are heterocyclic aromatic compounds containing a quianazoline moiety substituted by one or more amine groups.	Afatinib is a kinase inhibitor indicated for the first-line treatment of patient with metastatic non-small cell lung cancer (NSCLC) whose tumours have epidermal growth factor receptor (EGFR) exon 19 deletions or exon 21 (L858R) substitution mutations as detected by an FDA-approved test.	10184653	0.441655	0.238662
DB07859	4-(4-CHLOROPHENYL)-4-[4-(1H-PYRAZOL-4-YL)PHENYL]PIPERIDINE	BRD-K12040459	AT7867	experimental;		regulation of G2/M transition of mitotic cell cycle		11175137	0.44154	0.183467
DB07503	(5E)-5-[(2,2-DIFLUORO-1,3-BENZODIOXOL-5-YL)METHYLENE]-1,3-THIAZOLIDINE-2,4-DIONE	BRD-K63915849	AS-604850	experimental;		innate immune response		5287855	0.441035	0.03837
DB00608	Chloroquine diphosphate	BRD-A91699651	chloroquine	approved;vet_approved;	P01BA01;	This compound belongs to the class of organic compounds known as aminoquinolines and derivatives. These are organic compounds containing an amino group attached to a quinoline ring system.	For the suppressive treatment and for acute attacks of malaria due to P. vivax, P.malariae, P. ovale, and susceptible strains of P. falciparum, Second-line agent in treatment of Rheumatoid Arthritis	2719	0.43316	0.0997142
DB04794	Bifonazole	BRD-A94543220	bifonazole	approved;	D01AC10;D01AC60;	Bifonazole is an azole antifungal drug. [Wikipedia]	Used for the treatment of various topical fungal infections, including athlete's foot (tinea pedis).	2378	0.432045	0.38815
DB00903	Ethacrynate sodium	BRD-K63630713	etacrynic-acid	approved;	C03CC01;	This compound belongs to the class of organic compounds known as phenoxyacetic acid derivatives. These are compounds containing an anisole where the methane group is linked to an acetic acid or a derivative.	For the treatment of high blood pressure and edema caused by diseases like congestive heart failure, liver failure, and kidney failure.	3278	0.4318	0.0535475
DB00382	Tacrine Hydrochloride	BRD-K81473089	tacrine	withdrawn;	N06DA01;	This compound belongs to the class of organic compounds known as acridines. These are organic compounds containing the acridine moiety, a linear tricyclic heterocycle which consists of two benzene rings joined by a pyridine ring.	For the palliative treatment of mild to moderate dementia of the Alzheimer's type.	1935	0.431465	0.0276425
DB03777	Rbt205 Inhibitor	BRD-K31342827	bisindolylmaleimide	experimental;		This compound belongs to the class of organic compounds known as alpha-hydroxyaldehydes. These are organic compounds containing an aldehyde substituted with a hydroxyl group on the adjacent carbon.		2396	0.429985	0.109756
DB00503	Ritonavir	BRD-K51485625	ritonavir	approved;investigational;	J05AE03;J05AR10;J05AX66;J05AX67;	An HIV protease inhibitor that works by interfering with the reproductive cycle of HIV. [PubChem]	Indicated in combination with other antiretroviral agents for the treatment of HIV-infection.	392622	0.429525	0.0178925
DB01083	Orlistat	BRD-K63343048	orlistat	approved;investigational;	A08AB01;	Orlistat is a drug designed to treat obesity. Its primary function is preventing the absorption of fats from the human diet, thereby reducing caloric intake. Orlistat works by inhibiting pancreatic lipase, an enzyme that breaks down triglycerides in the intestine. Without this enzyme, triglycerides from the diet are prevented from being hydrolyzed into absorbable free fatty acids and are excreted…	For obesity management including weight loss and weight maintenance when used in conjunction with a reduced-calorie diet. Also used to reduce the risk for weight regain after prior weight loss. Use of orlistat is pending revision due to reports of liver-related adverse events.	3034010	0.429045	0.224115
DB00600	Monobenzone	BRD-K54262262	monobenzone	approved;	D11AX13;	alkaloid catabolic process	Used topically to treat the loss of skin color (vitiligo).	7638	0.426295	0.214583
DB01144	Diclofenamide	BRD-K71499074	diclofenamide	approved;	S01EC02;	A carbonic anhydrase inhibitor that is used in the treatment of glaucoma. [PubChem]	For adjunctive treatment of: chronic simple (open-angle) glaucoma, secondary glaucoma, and preoperatively in acute angle-closure glaucoma where delay of surgery is desired in order to lower intraocular pressure	3038	0.42624	0.0372225
DB00869	Dorzolamide Hydrochloride	BRD-K48617017	dorzolamide	approved;	S01EC03;	This compound belongs to the class of organic compounds known as 2,3,5-trisubstituted thiophenes. These are organic compounds containing a thiophene that is trisubstituted at the C-2, C3- and C5-positions.	For the treatment of elevated intraocular pressure in patients with ocular hypertension or open-angle glaucoma. Also used prophylatically for the inhibition of perioperative IOP increase (before neodynium yttrium aluminum garnet laser posterior capsulotomy).	5284549	0.426125	0.0126175
DB00839	Tolazamide	BRD-K32164935	tolazamide	approved;	A10BB05;	A sulphonylurea hypoglycemic agent with actions and uses similar to those of chlorpropamide. [PubChem]	For use as an adjunct to diet to lower the blood glucose in patients with non-insulin dependent diabetes mellitus (Type II) whose hyperglycemia cannot be satisfactorily controlled by diet alone.	5503	0.42327	0.0408113
DB00561	Doxapram Hydrochloride	BRD-A46179541	doxapram	approved;vet_approved;	R07AB01;	This compound belongs to the class of organic compounds known as diphenylmethanes. These are compounds containing a diphenylmethane moiety, which consists of a methane wherein two hydrogen atoms are replaced by two phenyl groups.	For use as a temporary measure in hospitalized patients with acute respiratory insufficiency superimposed on chronic obstructive pulmonary disease.	3156	0.420165	0.022105
DB00233	Aminosalicylate Sodium	BRD-K80267133	aminosalicylic-acid	approved;	J04AA01;	This compound belongs to the class of organic compounds known as aminosalicylic acids. These are salicylic acids carrying an amino group on the benzene ring.	For the treatment of tuberculosis	4649	0.418935	0.00668
DB01009	Ketoprofen	BRD-A97739905	ketoprofen	approved;vet_approved;	M01AE03;M01AE53;M02AA10;	Ketoprofen, a propionic acid derivative, is a nonsteroidal anti-inflammatory agent (NSAIA) with analgesic and antipyretic properties.	For symptomatic treatment of acute and chronic rheumatoid arthritis, osteoarthritis, ankylosing spondylitis, primary dysmenorrhea and mild to moderate pain associated with musculotendinous trauma (sprains and strains), postoperative (including dental surgery) or postpartum pain.	3825	0.417225	0.01547
DB01011	Metyrapone	BRD-K46862739	metyrapone	approved;	V04CD01;	An inhibitor of the enzyme steroid 11-beta-monooxygenase. It is used as a test of the feedback hypothalamic-pituitary mechanism in the diagnosis of cushing syndrome. [PubChem]	Used as a diagnostic drug for testing hypothalamic-pituitary ACTH function. Occasionally used in Cushing's syndrome.	4174	0.41691	0.021285
DB00409	Remoxipride	BRD-K54094468	remoxipride	approved;withdrawn;	N05AL04;	An antipsychotic agent that is specific for dopamine D2 receptors. It has been shown to be effective in the treatment of schizophrenia. [PubChem]	Remoxipride is an atypical antipsychotic once used for the treatment of schizophrenia.	54477	0.416235	0.205038
DB00990	Exemestane	BRD-K33425534	exemestane	approved;investigational;	L02BG06;	Exemestane is an oral steroidal aromatase inhibitor used in the adjuvant treatment of hormonally-responsive (also called hormone-receptor-positive, estrogen-responsive) breast cancer in postmenopausal women. It acts as a false substrate for the aromatase enzyme, and is processed to an intermediate that binds irreversibly to the active site of the enzyme causing its inactivation.	For the treatment of advanced breast cancer in postmenopausal women whose disease has progressed following tamoxifen therapy.	60198	0.4159	0.228015
DB00175	Pravastatin Sodium	BRD-K60511616	pravastatin	approved;	C10AA03;C10BA03;C10BX02;	This compound belongs to the class of organic compounds known as carbocyclic fatty acids. These are fatty acids containing a carbocylic ring .	For the treatment of hypercholesterolemia and to reduce the risk of cardiovascular disease.	54687	0.414265	0.129238
DB01119	Diazoxide	BRD-K73109821	diazoxide	approved;	C02DA01;V03AH01;	A benzothiadiazine derivative that is a peripheral vasodilator used for hypertensive emergencies. It lacks diuretic effect, apparently because it lacks a sulfonamide group. [PubChem]	Used parentally to treat hypertensive emergencies. Also used to treat hypoglycemia secondary to insulinoma.	3019	0.413835	0.180962
DB05424	CI-1033	BRD-K50168500	canertinib	investigational;		transcription initiation from RNA polymerase II promoter	Investigated for use/treatment in breast cancer and lung cancer.	156414	0.41373	0.0240519
DB06603	Panobinostat lactate	BRD-K02130563	panobinostat	approved;investigational;	L01XX42;	This compound belongs to the class of organic compounds known as tryptamines and derivatives. These are compounds containing the tryptamine backbone, which is structurally characterized by an indole ring subsituted at the 3-position by an ethanamine.	Panobinostat is indicated in the treatment of multiple myeloma in combination with dexamethasone and bortezomib in patients who have received 2 previous treatment regimens including bortezomib and an immunomodulatory agent. This indication is approved by accelerated approval based on progression free survival as of February 23, 2015.	6918837	0.412555	0.0703839
DB06710	Methyltestosterone	BRD-K84036904	testosterone	approved;	G03BA02;G03EA01;G03EK01;	A synthetic anabolic steroid used for treating men with testosterone deficiency or similar androgen replacement therapies. Also, has antineoplastic properties and so has been used secondarily in women with advanced breast cancer. Methyltestosterone is a schedule III drug in the US.	Methyltestosterone is an anabolic steroid hormone used to treat men with a testosterone deficiency. It is also used in women to treat breast cancer, breast pain, swelling due to pregnancy, and with the addition of estrogen it can treat symptoms of menopause.	6010	0.41219	0.20304
DB01205	Flumazenil	BRD-K98769987	flumazenil	approved;	V03AB25;	Fumazenil is an imidazobenzodiazepine derivative and a potent benzodiazepine receptor antagonist that competitively inhibits the activity at the benzodiazepine recognition site on the GABA/benzodiazepine receptor complex, thereby reversing the effects of benzodiazepine on the central nervous system.	For the complete or partial reversal of the sedative effects of benzodiazepines in cases where general anesthesia has been induced and/or maintained with benzodiazepines, and where sedation has been produced with benzodiazepines for diagnostic and therapeutic procedures. Also for the management of benzodiazepine overdose as an adjunct for appropriate supportive and symptomatic measures.	3373	0.411465	0.0197625
DB04342	7-((Carboxy(4-Hydroxyphenyl)Acetyl)Amino)-7-Methoxy-(3-((1-Methyl-1h-Tetrazol-5-Yl)Thio)Methyl)-8-Oxo-5-Oxa-1-Azabicyclo[4.2.0]Oct-2-Ene-2-Carboxylic Acid	BRD-K40831222	latamoxef	experimental;		This compound belongs to the class of organic compounds known as gamma-glutamyl peptides. These are oligo- and polypeptides consisting of any C-terminal alpha peptide having a gamma-glutamyl residue attached at the N alpha-position.		5488645	0.4099	0.03098
DB00158	Folate sodium	BRD-K18673820	folic-acid	approved;nutraceutical;vet_approved;	B03AE01;B03AE02;B03BB01;B03BB51;	This compound belongs to the class of organic compounds known as folic acids. These are heterocyclic compounds based on the 4-[(pteridin-6-ylmethyl)amino]benzoic acid skeleton conjugated with one or more L-glutamate units.	For treatment of folic acid deficiency, megaloblastic anemia and in anemias of nutritional supplements, pregnancy, infancy, or childhood.	6037	0.408785	0.0233525
DB04104	3-Methyladenine	BRD-K81647657	BRD-K81647657	experimental;		regulation of mRNA 3'-end processing		1673	0.408645	0.20565
DB00293	Raltitrexed	BRD-K89839824	raltitrexed	approved;investigational;	L01BA03;	Raltitrexed (brand name Tomudex&amp;reg;) is a chemotherapy drug manufactured AstraZeneca Company, is an antimetabolite used in chemotherapy. It is an inhibitor of thymidylate synthase.	For the treatment of malignant neoplasm of colon and rectum	104758	0.408295	0.17399
DB00507	Nitazoxanide	BRD-K96471533	nitazoxanide	approved;investigational;vet_approved;	P01AX11;	Nitazoxanide, also known by the brand name Alinia, is a synthetic nitrothiazolyl-salicylamide derivative and an anti-protozoal agent. It is approved for treatment of infectious diarrhea caused by Cryptosporidium parvum and Giardia lamblia in patients 1 year of age and older. Following oral administration it is rapidly hydrolyzed to its active metabolite, tizoxanide, which is 99% protein bound. Pe…	For the treatment of diarrhea in adults and children caused by the protozoa &lt;i&gt;Giardia lamblia&lt;/i&gt; and for the treatment of diarrhea in children caused by the protozoa &lt;i&gt;Cryptosporidium parvum&lt;/i&gt;.	41684	0.406685	0.196343
DB08877	Ruxolitinib Phosphate	BRD-K53972329	ruxolitinib	approved;	L01XE18;	This compound belongs to the class of organic compounds known as pyrrolopyrimidines. These are compounds containing a pyrrolopyrimidine moiety, which consists of a pyrrole ring fused to a pyrimidine. Pyrrole is 5-membered ring consisting of four carbon atoms and one nitrogen atom. Pyrimidine is a 6-membered ring consisting of four carbon atoms and two nitrogen centers at the 1- and 3- ring positi…	Treatment of intermediate or high-risk myelofibrosis, including primary myelofibrosis, post-polycythemia vera (post-PV) myelofibrosis and post-essential thrombocythemia (post-ET) myelofibrosis. [Lexicomp] Myeolofibrosis is the proliferation of abnormal bone marrow stem cells which cause fibrosis (the excessive formation of connective tissue).	25126798	0.406375	0.0438069
DB01137	Levofloxacin hemihydrate	BRD-K09471561	levofloxacin	approved;investigational;	A02BD10;J01MA12;J01RA05;S01AE05;	This compound belongs to the class of organic compounds known as quinoline carboxylic acids. These are quinolines in which the quinoline ring system is substituted by a carboxyl group at one or more positions.	For the treatment of bacterial conjunctivitis caused by susceptible strains of the following organisms: &lt;i&gt;Corynebacterium&lt;/i&gt; species, &lt;i&gt;Staphylococus aureus&lt;/i&gt;, &lt;i&gt;Staphylococcus epidermidis&lt;/i&gt;, &lt;i&gt;Streptococcus pneumoniae&lt;/i&gt;, &lt;i&gt;Streptococcus&lt;/i&gt; (Groups C/F/G), Viridans group streptococci, &lt;i&gt;Acinetobacter lwoffii&lt;/i&gt;…	149096	0.40625	0.364223
DB00590	Doxazosin	BRD-A13188892	doxazosin	approved;	C02CA04;	Doxazosin is a quinazoline-derivative that selectively antagonizes postsynaptic &amp;alpha;&lt;sub&gt;1&lt;/sub&gt;-adrenergic receptors. It may be used to mild to moderate hypertension and in the management of symptomatic benign prostatic hyperplasia (BPH). &amp;alpha;&lt;sub&gt;1&lt;/sub&gt;-Receptors mediate contraction and hypertrophic growth of smooth muscle cells. Antagonism of these recept…	For treatment and management of mild to moderate hypertension and urinary obstruction symptoms caused by BPH.	3157	0.405995	0.022465
DB00465	Ketorolac tromethamine	BRD-A40639672	ketorolac	approved;	M01AB15;S01BC05;	This compound belongs to the class of organic compounds known as acetophenones. These are organic compounds containing the acetophenone structure.	For the short-term (~5 days) management of moderately severe acute pain that requires analgesia at the opioid level, usually in a postoperative setting.	3826	0.40529	0.196022
DB02709	Resveratrol	BRD-K80738081	resveratrol	experimental;investigational;		Resveratrol (3,5,4'-trihydroxystilbene) is a polyphenolic phytoalexin. It is a stilbenoid, a derivate of stilbene, and is produced in plants with the help of the enzyme stilbene synthase. It exists as two structural isomers: cis-(Z) and trans-(E), with the trans-isomer shown in the top image. The trans- form can undergo isomerisation to the cis- form when heated or exposed to ultraviolet irradiat…	Being investigated for the treatment of Herpes labialis infections (cold sores).	445154	0.404715	0.020443
DB00645	Dyclonine hydrochloride	BRD-K72259270	dyclonine	approved;	N01BX02;R02AD04;	This compound belongs to the class of organic compounds known as phenylpropylamines. These are compounds containing a phenylpropylamine moiety, which consists of a phenyl group substituted at the third carbon by an propan-1-amine.	Used to provide topical anesthesia of accessible mucous membranes prior to examination, endoscopy or instrumentation, or other procedures involving the esophagus, larynx, mouth, pharynx or throat, respiratory tract or trachea, urinary tract, or vagina. Also used to suppress the gag reflex and/or other laryngeal and esophageal reflexes to facilitate dental examination or procedures (including oral…	3180	0.404335	0.0032875
DB03880	Batimastat	BRD-K82818427	batimastat	experimental;		carbohydrate metabolic process		5362422	0.402305	0.193752
DB01025	Amlexanox	BRD-K29530284	amlexanox	approved;investigational;	A01AD07;R03DX01;	Amlexanox is an antiallergic drug, clinically effective for atopic diseases, especially allergic asthma and rhinitis. Amlexanox as a topical paste is a well tolerated treatment of recurrent aphthous ulcers. Recurrent aphthous ulcer (RAU) is the most prevalent oral mucosal disease in humans, estimated to affect between 5% and 50% of the general population.	Used as a paste in the mouth to treat aphthous ulcers (canker sores).	2161	0.40223	0.012975
DB01090	Pentolinium tartrate	BRD-K44942604	pentolinium	approved;		This compound belongs to the class of organic compounds known as n-alkylpyrrolidines. These are compounds containing a pyrrolidine moiety that is substituted at the N1-position with an alkyl group. Pyrrolidine is a five-membered saturated aliphatic heterocycle with one nitrogen atom and four carbon atoms.	Used to produce controlled hypotension during surgical procedures and in hypertensive crises.	5850	0.40145	0.197428
DB08348	N~2~,N~2~-DIMETHYL-N~1~-(6-OXO-5,6-DIHYDROPHENANTHRIDIN-2-YL)GLYCINAMIDE	BRD-K11853856	PJ-34	experimental;		brown fat cell differentiation		4858	0.401105	0.0408392
DB04581	1-benzylimidazole	BRD-K32795028	1-benzylimidazole	experimental;		1-benzylimidazole, an N-imidazole derivative, has been shown to have strong cardiotonic activity.		77918	0.39653	0.388515
DB01039	Choline fenofibrate	BRD-K50388907	fenofibrate	approved;	C10AB05;C10AB11;C10BA03;C10BA04;	This compound belongs to the class of organic compounds known as benzophenones. These are organic compounds containing a ketone attached to two phenyl groups.	For use as adjunctive therapy to diet to reduce elevated LDL-C, Total-C,Triglycerides and Apo B, and to increase HDL-C in adult patients with primary hypercholesterolemia or mixed dyslipidemia (Fredrickson Types IIa and IIb)	3339	0.394665	0.375727
DB01021	Trichlormethiazide	BRD-A28940325	trichlormethiazide	approved;vet_approved;	C03AA06;C03AB06;C03EA02;	A thiazide diuretic with properties similar to those of hydrochlorothiazide. (From Martindale, The Extra Pharmacopoeia, 30th ed, p830)	Used in the treatment of oedema (including that associated with heart failure) and hypertension.	5560	0.394365	0.196543
DB00367	Levonorgestrel	BRD-K35189033	levonorgestrel	approved;investigational;	G03AA07;G03AB03;G03AC03;G03AD01;G03FA11;G03FB09;	A synthetic progestational hormone with actions similar to those of progesterone and about twice as potent as its racemic or (+-)-isomer (norgestrel). It is used for contraception, control of menstrual disorders, and treatment of endometriosis. It is usually supplied in a racemic mixture (Norgestrel, 6533-00-2). Only the levonorgestrel isomer is active. Levonorgestrel is marketed mostly as a comb…	For the treatment of menopausal and postmenopausal disorders and alone or in combination with other hormones as an oral contraceptive.	13109	0.394135	0.01607
DB00868	Benzonatate	BRD-K91699951	benzonatate	approved;	R05DB01;	Benzonatate is a non-narcotic oral antitussive (cough suppressant) drug which works by anesthetizing the tissues of the lungs and pleura responsible for the cough reflex. It is chemically related to other ester anesthetics such as procaine. It has an anesthetic (numbing) action similar to that of benzocaine and numbs the stretch sensors in the lungs. It is the stretching of these sensors with bre…	For the symptomatic relief of cough. Has also been applied locally in the oral cavity in adults by releasing the drug from the liquid-filled capsules to provide oropharyngeal anesthesia for conscious intubation.	7699	0.39329	0.1753
DB00346	Alfuzosin Hydrochloride	BRD-A09056319	alfuzosin	approved;investigational;	G04CA01;G04CA51;	This compound belongs to the class of organic compounds known as quinazolinamines. These are heterocyclic aromatic compounds containing a quianazoline moiety substituted by one or more amine groups.	For the reduction of urinary obstruction and relief of associated manifestations (eg. sensation of incomplete bladder emptying or straining, urgency, interrupted or weak stream) in patients with symptomatic beningn prostatic hyperplasia.	2092	0.393165	0.0254225
DB00342	Terfenadine	BRD-A06352418	terfenadine	withdrawn;	R06AX12;	In the U.S., Terfenadine was superseded by fexofenadine in the 1990s due to the risk of cardiac arrhythmia caused by QT interval prolongation.	For the treatment of allergic rhinitis, hay fever, and allergic skin disorders.	5405	0.392105	0.18764
DB01361	Troleandomycin	BRD-K38310698	troleandomycin	approved;	J01FA08;	A macrolide antibiotic that is similar to erythromycin.	For the treatment of Pneumococcal pneumonia due to susceptible strains and group A beta-hemolytic streptococcal infections of the upper respiratory tract.	202225	0.392095	0.183185
DB05465	MLN-518	BRD-K89162000	tandutinib	investigational;		toll-like receptor 3 signaling pathway	Investigated for use/treatment in leukemia (myeloid).	3038522	0.390705	0.181998
DB07615	Tranilast	BRD-K19533706/BRD-K17849083	tranilast	approved;investigational;		Tranilast is an antiallergic drug developed by Kissei Pharmaceuticals. It was approved in 1982 for use in Japan and South Korea for bronchial asthma. Indications for keloid and hypertrophic scar were added in 1993. It has been used for the treatment of allergic disorders such as asthma, allergic rhinitis and atopic dermatitis.	For the treatment of bronchial asthma, keloid and hypertrophic scar, and allergic disorders such as asthma, allergic rhinitis and atopic dermatitis.	5282230	0.39054	0.0225025
DB01006	Letrozole	BRD-K88789588	letrozole	approved;investigational;	L02BG04;	alkaloid metabolic process	For the extended adjuvant treatment of early breast cancer in postmenopausal women who have received 5 years of adjuvant tamoxifen therapy. Also for first-line treatment of postmenopausal women with hormone receptor positive or hormone receptor unknown locally advanced or metastatic breast cancer. Also indicated for the treatment of advanced breast cancer in postmenopausal women with disease prog…	3902	0.389735	0.184058
DB04552	Niflumic Acid	BRD-K98763141	niflumic-acid	approved;	M01AX02;M02AA17;	An analgesic and anti-inflammatory agent used in the treatment of rheumatoid arthritis. [PubChem]	Used in the treatment of rheumatoid arthritis.	4488	0.38791	0.178267
DB01020	Isosorbide Mononitrate	BRD-K82225283	isosorbide	approved;	C01DA14;	regulation of heart contraction	For the prevention of angina pectoris due to coronary artery disease and the treatment of acute and chronic angina pectoris, hypertension, and myocardial infarction.	27661	0.387395	0.38364
DB08078	{4-[3-(4-acetyl-3-hydroxy-2-propylphenoxy)propoxy]phenoxy}acetic acid	BRD-K98372770	L-2167	experimental;		receptor-mediated endocytosis		6603901	0.386925	0.380868
DB00162	Vitamin A acetate	BRD-K22429181	retinol	approved;nutraceutical;vet_approved;	A11CA01;D10AD02;R01AX02;S01XA02;	This compound belongs to the class of organic compounds known as retinoids. These are oxygenated derivatives of 3,7-dimethyl-1-(2,6,6-trimethylcyclohex-1-enyl)nona-1,3,5,7-tetraene and derivatives thereof.	For the treatment of vitamin A deficiency.	445354	0.386805	0.08463
DB00549	Zafirlukast	BRD-K71289571	zafirlukast	approved;investigational;	R03DC01;	nucleic acid phosphodiester bond hydrolysis	For the prophylaxis and chronic treatment of asthma.	5717	0.386395	0.195628
DB00448	Lansoprazole	BRD-A49172652	lansoprazole	approved;investigational;	A02BC03;A02BC53;A02BD02;A02BD03;A02BD07;A02BD09;A02BD10;	Lansoprazole is a proton pump inhibitor which prevents the stomach from producing acid. It is manufactured by TAP Pharmaceutical Products. Lansoprazole has been marketed for many years and is one of several PPI's available.	For the treatment of acid-reflux disorders (GERD), peptic ulcer disease, H. pylori eradication, and prevention of gastroinetestinal bleeds with NSAID use.	3883	0.38639	0.0188525
DB00275	Olmesartan medoxomil	BRD-K83144676	olmesartan	approved;investigational;	C09CA08;C09DA08;C09DB02;C09DX03;	This compound belongs to the class of organic compounds known as biphenyltetrazoles and derivatives. These are organic compounds containing a biphenyl attached to a tetrazole. A carbon atom of the biphenyl moiety is boned to a carbon or the nitrogen atom of the tetrazole moiety.	For the treatment of hypertension.	158781	0.386195	0.0123275
DB08700	3-[(1R)-1-(2,6-dichloro-3-fluorophenyl)ethoxy]-5-(1-piperidin-4-yl-1H-pyrazol-4-yl)pyridin-2-amine	BRD-K78431006	crizotinib	experimental;		innate immune response		11626560	0.38489	0.00477563
DB00245	Benzatropine mesylate	BRD-K68804560	benzatropine	approved;	N04AC01;	This compound belongs to the class of organic compounds known as diphenylmethanes. These are compounds containing a diphenylmethane moiety, which consists of a methane wherein two hydrogen atoms are replaced by two phenyl groups.	For use as an adjunct in the therapy of all forms of parkinsonism and also for use in the control of extrapyramidal disorders due to neuroleptic drugs.	1201549	0.38483	0.211312
DB00821	Carprofen	BRD-A17411484	carprofen	approved;vet_approved;withdrawn;		Carprofen is a non-steroidal anti-inflammatory drug (NSAID) that is used by veterinarians as a supportive treatment for the relief of arthritic symptoms in geriatric dogs. Carprofen was previously used in human medicine for over 10 years (1985-1995). It was generally well tolerated, with the majority of adverse effects being mild, such as gastro-intestinal pain and nausea, similar to those record…	For use as a pain reliever in the treatment of joint pain and post-surgical pain.	2581	0.38362	0.186265
DB00514	Dextromethorphan hydriodide	BRD-K33211335	dextromethorphan	approved;	N07XX59;R05DA09;	This compound belongs to the class of organic compounds known as morphinans. These are polycyclic compounds with a four-ring skeleton with three condensed six-member rings forming a partially hydrogenated phenanthrene moiety, one of which is aromatic while the two others are alicyclic.	For treatment and relief of dry cough.	5360696	0.381445	0.02436
DB01195	Flecainide acetate	BRD-A09472452	flecainide	approved;withdrawn;	C01BC04;	This compound belongs to the class of organic compounds known as salicylamides. These are carboxamide derivatives of salicylic acid. Salicylic acid is the ortho-hydroxylated derivative of benzoic acid.	Flecainide is is a class Ic antiarrhythmic agent and as such, it is used for the prevention of paroxysmal supraventricular tachycardias (PSVT), including atrioventricular nodal reentrant tachycardia, atrioventricular reentrant tachycardia and other supraventricular tachycardias of unspecified mechanism associated with disablin.	3356	0.380785	0.20917
DB00196	Fluconazole	BRD-K05977355	fluconazole	approved;	D01AC15;J01RA07;J02AC01;	Triazole antifungal agent that is used to treat oropharyngeal candidiasis and cryptococcal meningitis in AIDS. [PubChem]	For the treatment of fungal infections.	3365	0.380355	0.164735
DB01217	Anastrozole	BRD-K52172416	anastrozole	approved;investigational;	L02BG03;	Anastrozole is a drug indicated in the treatment of breast cancer in post-menopausal women. It is used both in adjuvant therapy (i.e. following surgery) and in metastatic breast cancer. It decreases the amount of estrogens that the body makes. Anastrozole belongs in the class of drugs known as aromatase inhibitors. It inhibits the enzyme aromatase, which is responsible for converting androgens (p…	For adjuvant treatment of hormone receptor positive breast cancer , as well as hormonal treatment of advanced breast cancer in post-menopausal women. Has also been used to treat pubertal gynecomastia and McCune-Albright syndrome; however, manufacturer states that efficacy for these indications have not been established.	2187	0.38023	0.369897
DB00937	Diethylpropion Hydrochloride	BRD-A37288617	amfepramone	approved;illicit;	A08AA03;	This compound belongs to the class of organic compounds known as acetophenones. These are organic compounds containing the acetophenone structure.	Used in the management of exogenous obesity as a short-term adjunct (a few weeks) in a regimen of weight reduction based on caloric restriction.	7029	0.37855	0.181338
DB00207	Azithromycin dihydrate	BRD-K74501079	azithromycin	approved;	J01FA10;J01RA07;S01AA26;	This compound belongs to the class of organic compounds known as macrolides and analogues. These are organic compounds containing a lactone ring of at least twelve members.	For the treatment of patients with mild to moderate infections caused by susceptible strains of the designated microorganisms in the specific conditions: &lt;i&gt;H. influenzae&lt;/i&gt;, &lt;i&gt;M. catarrhalis&lt;/i&gt;, &lt;i&gt;S. pneumoniae&lt;/i&gt;, &lt;i&gt;C. pneumoniae&lt;/i&gt;, &lt;i&gt;M. pneumoniae&lt;/i&gt;, &lt;i&gt;S. pyogenes&lt;/i&gt;, &lt;i&gt;S. aureus&lt;/i&gt;, &lt;i&gt;S. …	447043	0.37845	0.22924
DB00641	Simvastatin	BRD-K22134346	simvastatin	approved;	A10BH51;C10AA01;C10BA02;C10BA04;C10BX01;C10BX04;	Simvastatin is a lipid-lowering agent that is derived synthetically from the fermentation of Aspergillus terreus. It is a potent competitive inhibitor of 3-hydroxy-3-methylglutaryl coenzyme A reductase (hydroxymethylglutaryl COA reductases), which is the rate-limiting enzyme in cholesterol biosynthesis. It may also interfere with steroid hormone production. Due to the induction of hepatic LDL rec…	For the treatment of hypercholesterolemia and for the reduction in the risk of cardiac heart disease mortality and cardiovascular events. It can also be used in adolescent patients for the treatment of heterozygous familial hypercholesterolemia.	54454	0.3782	0.162505
DB01080	Vigabatrin	BRD-A07893380	vigabatrin	approved;	N03AG04;	An analogue of gamma-aminobutyric acid, vigabatrin is an irreversible inhibitor of 4-aminobutyrate transaminase, the enzyme responsible for the catabolism of gamma-aminobutyric acid. (From Martindale The Extra Pharmacopoeia, 31st ed). Off-label uses include treatment of cocaine dependence.	For use as an adjunct in treatment resistant epilepsy, refractory complex partial seizures, and secondary generalized seizures. It is also used as monotherapy in infantile spasms in West syndrome.	5665	0.378135	0.018215
DB00480	Lenalidomide	BRD-A17883755	lenalidomide	approved;	L04AX04;	Lenalidomide (initially known as CC-5013 and marketed as Revlimid? by Celgene) is a derivative of thalidomide introduced in 2004. It was initially intended as a treatment for multiple myeloma, for which thalidomide is an accepted therapeutic modality, but has also shown efficacy in the hematological disorders known as the myelodysplastic syndromes. [Wikipedia] FDA approved on December 27, 2005.	Lenalidomide is indicated for the treatment of multiple myeloma in combination with dexamethasone. It is also indicated for the treatment of patients with transfusion-dependent anemia due to low- or intermediate- risk myelodysplastic syndromes (MDS) associated with a deletion 5q cytogenetic abnormality with or without additional cytogenetic abnormalities.	216326	0.376885	0.229988
DB00609	Ethionamide	BRD-K51207550	ethionamide	approved;	J04AD03;	A second-line antitubercular agent that inhibits mycolic acid synthesis. It also may be used for treatment of leprosy. (From Smith and Reynard, Textbook of Pharmacology, 1992, p868)	For use in the treatment of pulmonary and extrapulmonary tuberculosis when other antitubercular drugs have failed.	2761171	0.375775	0.21345
DB02925	Piretanide	BRD-K87990216	piretanide	experimental;	C03CA03;	pheromone binding		4849	0.374935	0.002635
DB00496	Darifenacin Hydrobromide	BRD-K95773607	darifenacin	approved;investigational;	G04BD10;	This compound belongs to the class of organic compounds known as diphenylmethanes. These are compounds containing a diphenylmethane moiety, which consists of a methane wherein two hydrogen atoms are replaced by two phenyl groups.	For the treatment of overactive bladder with symptoms of urge urinary incontinence, urgency and frequency.	444031	0.374505	0.19644
DB07159	6-({5-fluoro-2-[(3,4,5-trimethoxyphenyl)amino]pyrimidin-4-yl}amino)-2,2-dimethyl-2H-pyrido[3,2-b][1,4]oxazin-3(4H)-one	BRD-K20285085	fostamatinib	experimental;		regulation of mitotic centrosome separation		11213558	0.37426	0.00636938
DB00201	Caffeine citrate	BRD-K02404261	caffeine	approved;	N06BC01;V04CG30;	This compound belongs to the class of organic compounds known as alkaloids and derivatives. These are naturally occurring chemical compounds that contain mostly basic nitrogen atoms. This group also includes some related compounds with neutral and even weakly acidic properties. Also some synthetic compounds of similar structure are attributed to alkaloids. In addition to carbon, hydrogen and nitr…	For management of fatigue, orthostatic hypotension, and for the short term treatment of apnea of prematurity in infants.	2519	0.373765	0.18505
DB07477	BIPHENYL-4-YL-ACETALDEHYDE	BRD-K91740057	felbinac	experimental;		regulation of anion transport		3332	0.373755	0.195172
DB02659	Cholic Acid	BRD-K43164539	cholic-acid	approved;	A05AA03;	cellulose catabolic process	Oral cholic acid is indicated for: treatment of bile acid synthesis disorders due to single enzyme defects; and as adjunctive treatment of peroxisomal disorders including Zellweger spectrum disorders in patients who exhibit manifestations of liver disease, steatorrhea or complications from decreased fat soluble vitamin absorption.	221493	0.37259	0.0039875
DB00437	Allopurinol Sodium	BRD-K86307448	allopurinol	approved;	M04AA01;M04AA51;	This compound belongs to the class of organic compounds known as pyrazolopyrimidines. These are compounds containing a pyrazolopyrimidine skeleton, which consists of a pyrazole fused to a pyrimidine. Pyrazole is 5-membered ring consisting of three carbon atoms and two adjacent nitrogen centers. Pyrimidine is 6-membered ring consisting of four carbon atoms and two adjacent nitrogen atoms at the 1-…	For the treatment of hyperuricemia associated with primary or secondary gout. Also indicated for the treatment of primary or secondary uric acid nephropathy, with or without the symptoms of gout, as well as chemotherapy-induced hyperuricemia and recurrent renal calculi.	2094	0.37237	0.360215
DB04960	Tipifarnib	BRD-K62965247	tipifarnib-P2	investigational;		Tipifarnib (R-115777) is a substance that is being studied in the treatment of acute myeloid leukemia (AML) and other types of cancer. It belongs to the family of drugs called farnesyltransferase inhibitors. It is also called Zarnestra. In June 2005, the FDA issued a Not Approvable Letter for Zarnestra.	Investigated for use/treatment in colorectal cancer, leukemia (myeloid), pancreatic cancer, and solid tumors.	159324	0.37226	0.011915
DB00502	Haloperidol decanoate	BRD-K67783091	haloperidol	approved;	N05AD01;	This compound belongs to the class of organic compounds known as phenylpiperidines. These are compounds containing a phenylpiperidine skeleton, which consists of a piperidine bound to a phenyl group.	For the management of psychotic disorders (eg. schizophrenia) and delirium, as well as to control tics and vocal utterances of Tourette's syndrome (Gilles de la Tourette's syndrome). Also used for the treatment of severe behavioural problems in children with disrubtive behaviour disorder or ADHD (attention-deficit hyperactivity disorder). Haloperidol has been used in the prevention and control of…	3559	0.371165	0.198405
DB00648	Mitotane	BRD-A31204924	mitotane	approved;	L01XX23;	A derivative of the insecticide dichlorodiphenyldichloroethane that specifically inhibits cells of the adrenal cortex and their production of hormones. It is used to treat adrenocortical tumors and causes CNS damage, but no bone marrow depression. [PubChem]	For treatment of inoperable adrenocortical tumours; Cushing's syndrome	4211	0.37103	0.171123
DB00564	Carbamazepine	BRD-K71799949	carbamazepine	approved;investigational;	N03AF01;	An anticonvulsant used to control grand mal and psychomotor or focal seizures. Its mode of action is not fully understood, but some of its actions resemble those of phenytoin; although there is little chemical resemblance between the two compounds, their three-dimensional structure is similar. [PubChem]	For the treatment of epilepsy and pain associated with true trigeminal neuralgia.	2554	0.37067	0.0569238
DB00669	Sumatriptan Succinate	BRD-K50938287	sumatriptan	approved;investigational;	N02CC01;	This compound belongs to the class of organic compounds known as tryptamines and derivatives. These are compounds containing the tryptamine backbone, which is structurally characterized by an indole ring subsituted at the 3-position by an ethanamine.	For the treatment of migraine attacks with or without aura.	5358	0.369955	0.167118
DB02020	Alrestatin	BRD-K35498378	alrestatin	experimental;		This compound belongs to the class of organic compounds known as anthracenes. These are organic compounds containing a system of three linearly fused benzene rings.		2120	0.36796	0.36796
DB05266	Ibudilast	BRD-K16444452	ibudilast	approved;investigational;	R03DC04;	Ibudilast is an anti-inflammatory and neuroprotective oral agent which shows an excellent safety profile at 60 mg/day and provides significantly prolonged time-to-first relapse and attenuated brain volume shrinkage in patients with relapsing-remitting (RR) and/or secondary progressive (SP) multiple sclerosis (MS). Ibudilast is currently in development in the U.S. (codes: AV-411 or MN-166), but is…	For the treatment of multiple sclerosis, asthma, and cerebrovascular disease.	3671	0.36749	0.1434
DB06282	Levocetirizine dihydrochloride	BRD-K27184429	levocetirizine	approved;	R06AE09;	This compound belongs to the class of organic compounds known as diphenylmethanes. These are compounds containing a diphenylmethane moiety, which consists of a methane wherein two hydrogen atoms are replaced by two phenyl groups.	Levocetirizine is indicated for the relief of symptoms associated with allergic rhinitis (seasonal and perennial) in adults and children 6 years of age and older.	1549000	0.367045	0.186307
DB00562	Benzthiazide	BRD-K21450440	benzthiazide	approved;		Benzthiazide is used to treat hypertension and edema. Like other thiazides, benzthiazide promotes water loss from the body (diuretics). They inhibit Na+/Cl- reabsorption from the distal convoluted tubules in the kidneys. Thiazides also cause loss of potassium and an increase in serum uric acid. Thiazides are often used to treat hypertension, but their hypotensive effects are not necessarily due t…	For the treatment of high blood pressure and management of edema.	2343	0.36633	0.357795
DB00269	Chlorotrianisene	BRD-K27062708	chlorotrianisene	withdrawn;	G03CA06;	A powerful synthetic, non-steroidal estrogen. [PubChem]	Used to treat symptoms of menopause, deficiencies in ovary function (including underdevelopment of female sexual characteristics and some types of infertility), and in rare cases, prostate cancer. Chlorotrianisene may also be used to prevent breast engorgement following childbirth.	11289	0.366275	0.15947
DB00996	Gabapentin	BRD-K62737565	gabapentin	approved;investigational;	N03AX12;	Gabapentin (brand name Neurontin) is a medication originally developed for the treatment of epilepsy. Presently, gabapentin is widely used to relieve pain, especially neuropathic pain. Gabapentin is well tolerated in most patients, has a relatively mild side-effect profile, and passes through the body unmetabolized.	For the management of postherpetic neuralgia in adults and as adjunctive therapy in the treatment of partial seizures with and without secondary generalization in patients over 12 years of age with epilepsy.	3446	0.366225	0.0150025
DB00253	Medrysone	BRD-K56515112	medrysone	approved;	S01BA08;	Medrysone is a corticosteroid used in ophthalmology. [Wikipedia]	For the treatment of allergic conjunctivitis, vernal conjunctivitis, episcleritis, and epinephrine sensitivity.	247839	0.36586	0.167632
DB00146	Calcidiol	BRD-K77175907	calcifediol	approved;nutraceutical;	A11CC06;	The major circulating metabolite of vitamin D3 (cholecalciferol). It is produced in the liver and is the best indicator of the body's vitamin D stores. It is effective in the treatment of rickets and osteomalacia, both in azotemic and non-azotemic patients. Calcifediol also has mineralizing properties. [PubChem]	Used to treat vitamin D deficiency or insufficiency, refractory rickets (vitamin D resistant rickets), familial hypophosphatemia and hypoparathyroidism, and in the management of hypocalcemia and renal osteodystrophy in patients with chronic renal failure undergoing dialysis. Also used in conjunction with calcium in the management and prevention of primary or corticosteroid-induced osteoporosis.	5283731	0.363985	0.346615
DB00249	Idoxuridine	BRD-K76634210	idoxuridine	approved;	D06BB01;J05AB02;S01AD01;	An analog of deoxyuridine that inhibits viral DNA synthesis. The drug is used as an antiviral agent. [PubChem]	For use in keratoconjunctivitis and keratitis caused by herpes simplex virus.	5905	0.36229	0.139865
DB00412	Rosiglitazone Maleate	BRD-A97437073	rosiglitazone	approved;investigational;	A10BD03;A10BD04;A10BG02;	This compound belongs to the class of organic compounds known as phenol ethers. These are aromatic compounds containing an ether group substituted with a benzene ring.	Rosiglitazone is indicated as an adjunct to diet and exercise to improve glycemic control in adults with type 2 diabetes mellitus.	77999	0.36228	0.0140613
DB03585	Oxyphenbutazone	BRD-A33749298	oxyphenbutazone	withdrawn;	M01AA03;M02AA04;S01BC02;	Oxyphenbutazone was withdrawn from the Canadian market in March 1985 due to concerns regarding bone marrow suppression.		4641	0.36168	0.188275
DB00498	Phenindione	BRD-K70592963	phenindione	approved;	B01AA02;	An indandione that has been used as an anticoagulant. Phenindione has actions similar to warfarin, but it is now rarely employed because of its higher incidence of severe adverse effects. (From Martindale, The Extra Pharmacopoeia, 30th ed, p234)	For the treatment of pulmonary embolism, cardiomyopathy, atrial fibrillation and flutter, cerebral embolism, mural thrombosis, and thrombophili. Also used for anticoagulant prophylaxis.	4760	0.36072	0.347405
[truncated: 49 more rows]

## Sheet: 144h_approved drugs
This table shows ES of approved compounds compared with eIF4G1-silenced cells at 144 h after irradiation. The threshold of maximum ES is 0.47 and the threshold of average ES is 0.30.
Drugbank_id	Drug_name	Pert_id	Pert_name	Drug_group	ATC_code	Drug_description	Drug_indication	Pubchem_id	ES_maximum	ES_average
[truncated: 142 more rows]
